# Supplementary material for: Green oxidant H2O2 as a hydrogen atom transfer reagent for visible light-mediated Minisci reaction
Source: Royal Society of Chemistry journal article supplement (doi:10.1039/c9nj03106e), 2019-01-01

New Journal of Chemistry

# **Green Oxidant H<sub>2</sub>O<sub>2</sub> as a Hydrogen Atom Transfer Reagent for Visible Light-Mediated Minisci Reaction**

Hong Zhao, Zhenlong Li, and Jian Jin\*

## **Table of Contents**

**I. General Information**

**II. Preliminary Mechanistic Studies**

**III. Reaction Setup**

**IV. Experimental Procedures and Product Characterization**

**V. NMR Spectra**

## I. General Information

Commercial reagents, lepidine, cyclohexane, hydrogen peroxide ( $\text{H}_2\text{O}_2$ , 29-32% in water), hydrochloric acid (HCl, 36-38% in water), and MeCN were purchased from J&K, TCI, Alfa Aesar, and used directly without purification. All heteroarenes, alkanes, ethers and other reagents were utilized directly from commercial suppliers. Organic solutions were concentrated under reduced pressure on a Büchi rotary evaporator with a recirculating cooling system. Chromatographic purification of products was accomplished by flash chromatography on silica gel (Santai, 230-400 mesh). Thin layer chromatography (TLC) was performed on Huanghai 0.4-0.5 mm silica gel plates. Visualization of the developed chromatogram was performed by fluorescence quenching.  $^1\text{H}$  and  $^{13}\text{C}$  NMR spectra were recorded on a Bruker UltraShield Plus 400 MHz (101 MHz) instrument, and are internally referenced to residual protio solvent signals (note:  $\text{CDCl}_3$  referenced at 7.26 and 77.0 ppm respectively). Data for  $^1\text{H}$  NMR are reported as follows: chemical shift ( $\delta$  ppm), multiplicity (s = singlet, d = doublet, t = triplet, q = quartet, m = multiplet, dd = doublet of doublets, dt = doublet of triplets, br = broad), coupling constant (Hz) and integration. Data for  $^{13}\text{C}$  NMR are reported in terms of chemical shift and no special nomenclature is used for equivalent carbons. IR spectra were recorded on a Perkin Elmer Spectrum 100 FTIR spectrometer and are reported in wavenumbers ( $\text{cm}^{-1}$ ). High resolution mass spectra were obtained at National Center for Organic Mass Spectrometry in Shanghai Institute of Organic Chemistry, Chinese Academy of Sciences on a Thermo Fisher Scientific LTQ FTICR-MS instrument with electrospray ionization method.

## II. Preliminary Mechanistic Studies

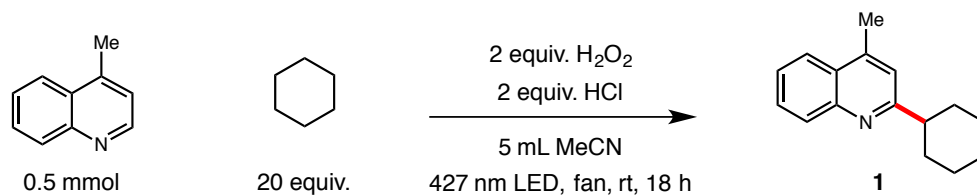

| Entry | Radical Scavenger           | Product <b>1</b> |
|-------|-----------------------------|------------------|
| 1     | TEMPO, 1.0 equiv., [0.10 M] | 9%               |
| 2     | TEMPO, 1.5 equiv., [0.15 M] | 0%               |

Yield determined by <sup>1</sup>H NMR using 1,3-benzodioxole as the internal standard.

**Figure S1. Radical quenching experiments.**

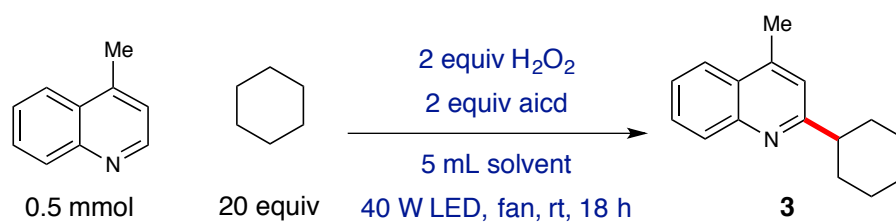

| entry           | solvent | acid        | wavelength  | Yield [%] |
|-----------------|---------|-------------|-------------|-----------|
| 1               | acetone | 2 equiv TFA | 427 nm      | 7         |
| 2               | acetone | 2 equiv HCl | 427 nm      | 40        |
| 3               | MeCN    | 2 equiv TFA | 427 nm      | 29        |
| 4               | MeCN    | 2 equiv HCl | 427 nm      | 87        |
| 5               | MeCN    | none        | 427 nm      | 0         |
| 6               | MeCN    | 2 equiv HCl | 390 nm      | 60        |
| 7               | MeCN    | 2 equiv HCl | 440 nm      | 73        |
| 8               | MeCN    | 2 equiv HCl | 456 nm      | 32        |
| 9               | MeCN    | 2 equiv HCl | dark        | 0         |
| 10              | MeCN    | 2 equiv HCl | dark, 50 °C | 0         |
| 11 <sup>b</sup> | MeCN    | 2 equiv HCl | 427 nm      | 87        |
| 12 <sup>c</sup> | MeCN    | 2 equiv HCl | 427 nm      | 0         |

<sup>a</sup>Yields determined by <sup>1</sup>H NMR using 1,3-benzodioxole as the internal standard. <sup>b</sup>At 2 mmol scale, isolated yield. <sup>c</sup>1.5 equiv of TEMPO added. LED = light-emitting diode.

**Figure S2. Control experiments.**

### III. Reaction Setup

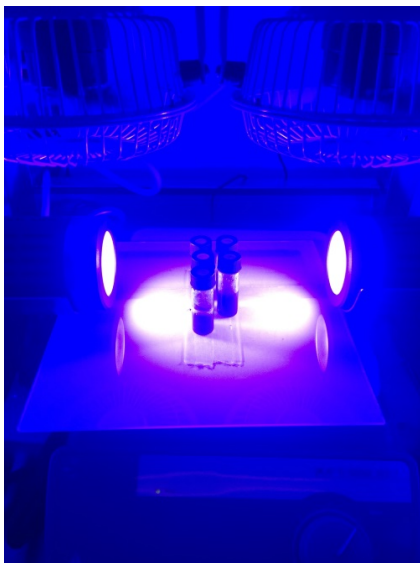

**Figure S3. Reaction setup with a magnetic stirrer, two Kessil 40 W 427 nm or 390 nm LED lamps, two mini fans and four reaction vials.**

#### Kessil PR160\_Spectrum

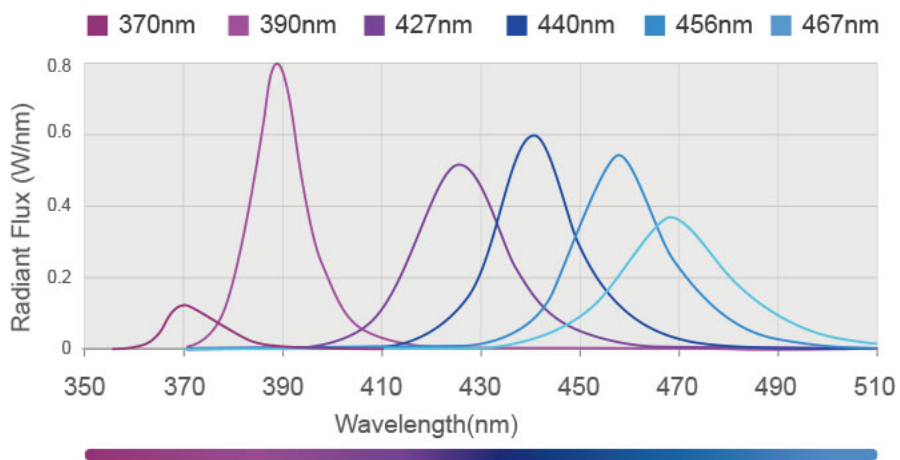

## IV. Experimental Procedures and Product Characterization

**General Procedure for the Oxidative Alkylation:** To an 8 mL vial equipped with a Teflon septum and a magnetic stir bar was charged heteroarene (0.50 mmol, 1.0 equiv.), 5.0 mL of MeCN, and hydrogen peroxide (H<sub>2</sub>O<sub>2</sub>, 29-32% in water, 0.1 mL, 1.0 mmol, 2.0 equiv.). The reaction mixture was degassed by sparging with nitrogen for 10 min with an outlet needle, and added with hydrochloric acid (HCl, 36-38% in water, 86.0  $\mu$ L, 1.0 mmol, 2.0 equiv.), alkane (10.0 mmol, 20.0 equiv.), then irradiated with Kessil 40 W 427 nm LEDs (approximately 8 cm away from the light source) under two mini fans at room temperature. Upon reaction completion as judged by TLC and LCMS (18 hours), the reaction mixture was diluted with 1 M NaOH aqueous solution (10 mL) and 1 M Na<sub>2</sub>S<sub>2</sub>O<sub>3</sub> aqueous solution (10 mL), and extracted with CH<sub>2</sub>Cl<sub>2</sub> (3 $\times$ 20 mL), dried over Na<sub>2</sub>SO<sub>4</sub>, and concentrated *in vacuo*. Purification of the crude product by flash chromatography on silica gel using the indicated solvent system afforded the desired product.

**Representative example at 2 mmol scale:** To a 40 mL vial equipped with a Teflon septum and a magnetic stir bar was charged lepidine (286.4 mg, 2.0 mmol, 1.0 equiv.), 20.0 mL of MeCN, and hydrogen peroxide (H<sub>2</sub>O<sub>2</sub>, 29-32% in water, 0.4 mL, 4.0 mmol, 2.0 equiv.). The reaction mixture was degassed by sparging with nitrogen for 10 min with an outlet needle, and added with hydrochloric acid (HCl, 36-38% in water, 344.0  $\mu$ L, 4.0 mmol, 2.0 equiv.), alkane (4.4 mL, 40.0 mmol, 20.0 equiv.), then irradiated with Kessil 40 W 427 nm LEDs (approximately 8 cm away from the light source) under two mini fans at room temperature for 18 h. The reaction mixture was diluted with 1 M NaOH aqueous solution (40 mL) and 1 M Na<sub>2</sub>S<sub>2</sub>O<sub>3</sub> aqueous solution (40 mL), and extracted

with CH<sub>2</sub>Cl<sub>2</sub> (3×80 mL), dried over Na<sub>2</sub>SO<sub>4</sub>, and concentrated *in vacuo*. Purification of the crude product by flash chromatography (10% ethyl acetate/hexanes) on silica gel provided the desired product 2-cyclohexyl-4-methylquinoline as a colorless oil (388.5 mg, 87% yield).

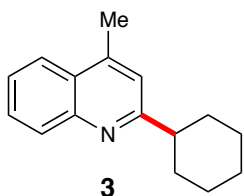

**2-Cyclohexyl-4-methylquinoline (3):** According to the general procedure, lepidine (71.6 mg, 0.50 mmol, 1.0 equiv.), 5.0 mL of MeCN, H<sub>2</sub>O<sub>2</sub> (0.1 mL, 1.0 mmol, 2.0 equiv.), HCl (86.0 μL, 1.0 mmol, 2.0 equiv.), cyclohexane (1.10 ml, 10.0 mmol, 20.0 equiv.) were used. After 18 hours, the reaction mixture was subjected to the workup procedure outlined in the general procedure and purified by flash chromatography (10% ethyl acetate/hexanes) to provide the title compound as a colorless oil (98.0 mg, 87% yield). <sup>1</sup>H NMR (400 MHz, CDCl<sub>3</sub>) δ 8.05 (d, *J* = 8.4 Hz, 1H), 7.93 (d, *J* = 8.3 Hz, 1H), 7.66 (ddd, *J* = 8.4, 6.9, 1.5 Hz, 1H), 7.48 (ddd, *J* = 8.2, 6.8, 1.3 Hz, 1H), 7.16 (s, 1H), 2.88 (tt, *J* = 12.0, 3.4 Hz, 1H), 2.67 (s, 3H), 2.07 – 1.96 (m, 2H), 1.94 – 1.84 (m, 2H), 1.83 – 1.74 (m, 1H), 1.62 (qd, *J* = 12.4, 2.9 Hz, 2H), 1.47 (qt, *J* = 12.6, 3.1 Hz, 2H), 1.35 (tt, *J* = 12.6, 3.3 Hz, 1H); <sup>13</sup>C NMR (101 MHz, CDCl<sub>3</sub>) δ 166.44, 147.52, 144.20, 129.39, 128.88, 126.97, 125.30, 123.50, 120.17, 47.54, 32.77, 26.50, 26.06, 18.79. Spectra data are consistent with those reported in the literature: *Angew. Chem. Int. Ed.* **2013**, 52, 3267–3271.

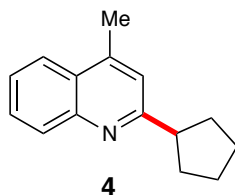

**2-Cyclopentyl-4-methylquinoline (4):** According to the general procedure, lepidine (71.6 mg, 0.50 mmol, 1.0 equiv.), 5.0 mL of MeCN, H<sub>2</sub>O<sub>2</sub> (0.1 mL, 1.0 mmol, 2.0 equiv.), HCl (86.0  $\mu$ L, 1.0 mmol, 2.0 equiv.), cyclopentane (0.90 ml, 10.0 mmol, 20.0 equiv.) were used. After 18 hours, the reaction mixture was subjected to the workup procedure outlined in the general procedure and purified by flash chromatography (10% ethyl acetate/hexanes) to provide the title compound as a colorless oil (85.6 mg, 81% yield). <sup>1</sup>H NMR (400 MHz, Chloroform-*d*)  $\delta$  8.06 (d, *J* = 8.4 Hz, 1H), 7.89 (d, *J* = 8.3 Hz, 1H), 7.64 (ddd, *J* = 8.4, 6.9, 1.5 Hz, 1H), 7.46 (ddd, *J* = 8.2, 6.8, 1.3 Hz, 1H), 7.15 (s, 1H), 3.33 (p, *J* = 8.6 Hz, 1H), 2.64 (s, 3H), 2.22 – 2.11 (m, 2H), 1.95 – 1.81 (m, 4H), 1.81 – 1.69 (m, 2H); <sup>13</sup>C NMR (101 MHz, CDCl<sub>3</sub>)  $\delta$  165.73, 147.38, 143.94, 129.32, 128.76, 126.81, 125.20, 123.38, 120.51, 48.66, 33.43, 25.91, 18.65. Spectra data are consistent with those reported in the literature: *Org. Lett.* **2017**, *19*, 6594-6597.

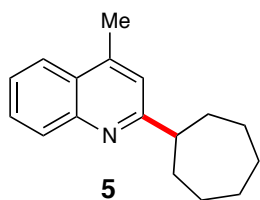

**2-Cycloheptyl-4-methylquinoline (5):** According to the general procedure, lepidine (71.6 mg, 0.50 mmol, 1.0 equiv.), 5.0 mL of MeCN, H<sub>2</sub>O<sub>2</sub> (0.1 mL, 1.0 mmol, 2.0 equiv.), HCl (86.0  $\mu$ L, 1.0 mmol, 2.0 equiv.), cycloheptane (1.20 ml, 10.0 mmol, 20.0 equiv.) were used. After 18 hours, the reaction mixture was subjected to the workup procedure outlined in the general procedure and purified by flash chromatography (10% ethyl acetate/hexanes) to provide the title compound as a colorless oil (91.0 mg, 76% yield). <sup>1</sup>H NMR (400 MHz, CDCl<sub>3</sub>)  $\delta$  8.04 (d, *J* = 8.4 Hz, 1H), 7.92 – 7.86 (m, 1H), 7.63 (ddd, *J* = 8.4, 6.8, 1.5 Hz, 1H), 7.45 (ddd, *J* = 8.2, 6.8, 1.3 Hz, 1H), 7.11 (s, 1H), 3.03 (tt, *J* = 10.5,

3.5 Hz, 1H), 2.63 (s, 3H), 2.10 – 1.97 (m, 2H), 1.90 – 1.76 (m, 4H), 1.76 – 1.68 (m, 2H), 1.68 – 1.56 (m, 4H);  $^{13}\text{C}$  NMR (101 MHz,  $\text{CDCl}_3$ )  $\delta$  167.88, 147.20, 144.15, 129.25, 128.73, 126.74, 125.12, 123.33, 120.10, 49.41, 34.89, 27.80, 27.29, 18.63. Spectra data are consistent with those reported in the literature: *Org. Lett.* **2019**, *21*, DOI: [acs.orglett.9b01439](https://doi.org/10.1021/acs.orglett.9b01439).

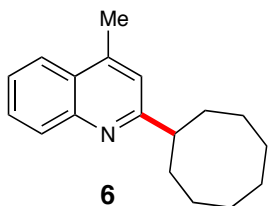

**2-Cyclooctyl-4-methylquinoline (6):** According to the general procedure, lepidine (71.6 mg, 0.50 mmol, 1.0 equiv.), 5.0 mL of MeCN,  $\text{H}_2\text{O}_2$  (0.1 mL, 1.0 mmol, 2.0 equiv.), HCl (86.0  $\mu\text{L}$ , 1.0 mmol, 2.0 equiv.), cyclooctane (1.30 mL, 10.0 mmol, 20.0 equiv.) were used. After 18 hours, the reaction mixture was subjected to the workup procedure outlined in the general procedure and purified by flash chromatography (10% ethyl acetate/hexanes) to provide the title compound as a colorless oil (86.2 mg, 68% yield).  $^1\text{H}$  NMR (400 MHz,  $\text{CDCl}_3$ )  $\delta$  8.06 (d,  $J = 8.4$  Hz, 1H), 7.89 (d,  $J = 8.3$  Hz, 1H), 7.64 (ddd,  $J = 8.4, 6.8, 1.5$  Hz, 1H), 7.45 (ddd,  $J = 8.2, 6.8, 1.3$  Hz, 1H), 7.11 (s, 1H), 3.11 (tt,  $J = 9.8, 3.6$  Hz, 1H), 2.64 (s, 3H), 2.05 – 1.93 (m, 2H), 1.93 – 1.77 (m, 4H), 1.77 – 1.54 (m, 8H);  $^{13}\text{C}$  NMR (101 MHz,  $\text{CDCl}_3$ )  $\delta$  168.66, 147.23, 144.17, 129.33, 128.78, 126.76, 125.18, 123.39, 120.53, 47.40, 33.39, 26.49, 26.30, 26.04, 18.71. Spectra data are consistent with those reported in the literature: *Org. Lett.* **2019**, *21*, DOI: [acs.orglett.9b01635](https://doi.org/10.1021/acs.orglett.9b01635).

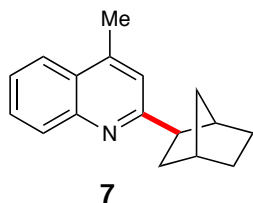



**2-(Bicyclo[2.2.1]heptan-2-yl)-4-methylquinoline (7):** According to the general procedure, lepidine (71.6 mg, 0.50 mmol, 1.0 equiv.), 5.0 mL of MeCN, H<sub>2</sub>O<sub>2</sub> (0.1 mL, 1.0 mmol, 2.0 equiv.), HCl (86.0  $\mu$ L, 1.0 mmol, 2.0 equiv.), bicyclo[2.2.1]heptane (721.3 mg, 7.5 mmol, 15.0 equiv.) were used. After 18 hours, the reaction mixture was subjected to the workup procedure outlined in the general procedure and purified by flash chromatography (20% ethyl acetate/hexanes) to provide the title compound as a colorless oil (87.8 mg, 74% yield). <sup>1</sup>H NMR (400 MHz, CDCl<sub>3</sub>)  $\delta$  8.06 (dd, *J* = 8.4, 1.3 Hz, 1H), 7.92 (dd, *J* = 8.3, 1.4 Hz, 1H), 7.65 (ddd, *J* = 8.4, 6.9, 1.5 Hz, 1H), 7.48 (ddd, *J* = 8.2, 6.8, 1.3 Hz, 1H), 7.18 (s, 1H), 3.01 (dd, *J* = 8.8, 5.5 Hz, 1H), 2.66 (s, 3H), 2.59 – 2.54 (d, *J* = 1.9 Hz, 1H), 2.45 – 2.39 (s, 1H), 2.31 – 2.21 (m, 1H), 1.79 – 1.56 (m, 4H), 1.52 – 1.44 (m, 1H), 1.38 – 1.31 (m, 1H), 1.22 – 1.16 (m, 1H); <sup>13</sup>C NMR (101 MHz, CDCl<sub>3</sub>)  $\delta$  165.45, 147.35, 143.65, 129.60, 128.71, 126.66, 125.21, 123.39, 121.47, 49.96, 42.98, 36.68, 36.18, 36.00, 30.46, 29.09, 18.70. Spectra data are consistent with those reported in the literature: *Org. Lett.* **2019**, *21*, DOI: [acs.orglett.9b01635](https://doi.org/10.1021/acs.orglett.9b01635).

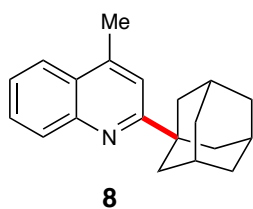

**2-(Adamantan-1-yl)-4-methylquinoline (8):** According to the general procedure, lepidine (71.6 mg, 0.50 mmol, 1.0 equiv.), 5.0 mL of MeCN, H<sub>2</sub>O<sub>2</sub> (0.1 mL, 1.0 mmol, 2.0 equiv.), HCl (86.0  $\mu$ L, 1.0 mmol, 2.0 equiv.), Adamantane (1.02 g, 7.5 mmol, 15.0 equiv.) were used. After 18 hours, the reaction mixture was subjected to the workup procedure outlined in the general procedure and purified by flash chromatography (20% ethyl acetate/hexanes) to provide the title compounds as a white solid (58.3 mg, 42%

yield).  $^1\text{H}$  NMR (400 MHz,  $\text{CDCl}_3$ )  $\delta$  8.08 (d,  $J = 8.4$  Hz, 1H), 7.94 (d,  $J = 8.3$  Hz, 1H), 7.66 (ddd,  $J = 8.4, 6.8, 1.5$  Hz, 1H), 7.49 (ddd,  $J = 8.2, 6.8, 1.3$  Hz, 1H), 7.33 (s, 1H), 2.69 (s, 3H), 2.16 (s, 3H), 2.13 (s, 6H), 1.84 (s, 6H);  $^{13}\text{C}$  NMR (101 MHz,  $\text{CDCl}_3$ )  $\delta$  168.64, 147.46, 143.54, 129.87, 128.59, 126.66, 125.28, 123.38, 118.48, 41.75, 39.50, 36.85, 28.80, 18.95; HRMS (ESI)  $m/z$  calculated for  $\text{C}_{20}\text{H}_{24}\text{N}$   $[(\text{M}+\text{H})^+]$  278.1903, found 278.1901. IR (film) 2902, 2846, 1595, 1552, 1505, 1444, 1412, 1340, 1309, 757  $\text{cm}^{-1}$ . Spectra data are consistent with those reported in the literature: *Org. Lett.* **2019**, *21*, DOI: [acs.orglett.9b01439](https://doi.org/10.1021/acs.orglett.9b01439).

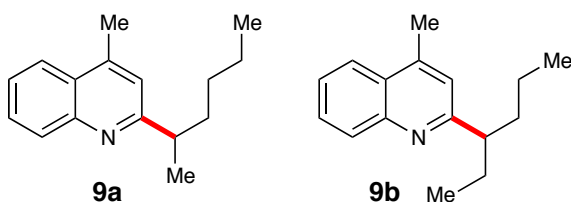

**2-(Hexan-2-yl)-4-methylquinoline (9a) and 2-(Hexan-3-yl)-4-methylquinoline (9b):**

According to the general procedure, lepidine (71.6 mg, 0.50 mmol, 1.0 equiv.), 5.0 mL of MeCN,  $\text{H}_2\text{O}_2$  (0.1 mL, 1.0 mmol, 2.0 equiv.), HCl (86.0  $\mu\text{L}$ , 1.0 mmol, 2.0 equiv.), hexane (1.30 mL, 10.0 mmol, 20.0 equiv.) were used. After 18 hours, the reaction mixture was subjected to the workup procedure outlined in the general procedure and purified by flash chromatography (10% ethyl acetate/hexanes) to provide the title compounds as a colorless oil mixture of 50.1 mg, 44% total yield (28% yield for **9a**; 16% yield for **9b**).

Compound **9a**:  $^1\text{H}$  NMR (400 MHz,  $\text{CDCl}_3$ )  $\delta$  8.06 (d,  $J = 8.3$  Hz, 1H), 7.95 (d,  $J = 8.3$  Hz, 1H), 7.66 (ddd,  $J = 8.4, 6.8, 1.4$  Hz, 1H), 7.49 (ddd,  $J = 8.2, 6.9, 1.3$  Hz, 1H), 7.14 (s, 1H), 3.03 (h,  $J = 7.0$  Hz, 1H), 2.68 (s, 3H), 1.88 – 1.57 (m, 3H), 1.37 – 1.25 (m, 2H), 1.35 (d,  $J = 7.0$  Hz, 3H), 1.24 – 1.12 (m, 1H), 0.85 (t,  $J = 7.0$  Hz, 3H);  $^{13}\text{C}$  NMR (101 MHz,

CDCl<sub>3</sub>)  $\delta$  166.91, 147.50, 144.23, 129.45, 128.87, 126.99, 125.34, 123.53, 120.10, 42.89, 36.77, 29.93, 22.80, 20.78, 18.84, 14.00. Spectra data are consistent with those reported in the literature: *Org. Lett.* **2019**, *21*, DOI: acs.orglett.9b01635.

Compound **9b**: <sup>1</sup>H NMR (400 MHz, CDCl<sub>3</sub>)  $\delta$  8.08 (d, *J* = 8.3 Hz, 1H), 7.95 (d, *J* = 8.3 Hz, 1H), 7.66 (ddd, *J* = 8.4, 6.8, 1.4 Hz, 1H), 7.49 (ddd, *J* = 8.2, 6.9, 1.3 Hz, 1H), 7.10 (s, 1H), 2.83 (p, *J* = 7.2 Hz, 1H), 2.68 (s, 3H), 1.88 – 1.57 (m, 2H), 1.37 – 1.25 (m, 3H), 1.24 – 1.12 (m, 1H), 0.86 (t, *J* = 7.0 Hz, 3H), 0.82 (t, *J* = 7.0 Hz, 3H); <sup>13</sup>C NMR (101 MHz, CDCl<sub>3</sub>)  $\delta$  165.78, 147.54, 143.95, 129.50, 128.80, 127.00, 125.30, 123.53, 120.65, 50.27, 37.66, 28.51, 20.82, 18.84, 14.23, 12.21. Spectra data are consistent with those reported in the literature: *Org. Lett.* **2019**, *21*, DOI: acs.orglett.9b01635.

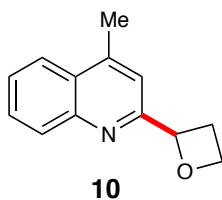

**4-Methyl-2-(oxetan-2-yl)quinoline (10):** According to the general procedure, lepidine (71.6 mg, 0.50 mmol, 1.0 equiv.), 5.0 mL of MeCN, H<sub>2</sub>O<sub>2</sub> (0.1 mL, 1.0 mmol, 2.0 equiv.), HCl (86.0  $\mu$ L, 1.0 mmol, 2.0 equiv.), trimethylene oxide (0.65 mL, 10.0 mmol, 20.0 equiv.) were used. After 18 hours, the reaction mixture was subjected to the workup procedure outlined in the general procedure and purified by flash chromatography (40% ethyl acetate/hexanes) to provide the title compound as a colorless oil (45.8 mg, 46% yield). <sup>1</sup>H NMR (400 MHz, CDCl<sub>3</sub>)  $\delta$  8.05 (d, *J* = 8.4 Hz, 1H), 7.98 (d, *J* = 8.3 Hz, 1H), 7.68 (ddd, *J* = 8.3, 6.9, 1.3 Hz, 1H), 7.67 (s, 1H), 7.53 (ddd, *J* = 8.3, 6.9, 1.3 Hz, 1H), 5.98 (dd, *J* = 8.4, 6.9 Hz, 1H), 4.92 (td, *J* = 8.0, 5.9 Hz, 1H), 4.77 (dt, *J* = 9.1, 6.0 Hz, 1H), 3.19 (dtd, *J* = 11.2, 8.4, 6.0 Hz, 1H), 2.80 (ddt, *J* = 11.3, 9.2, 7.3 Hz, 1H), 2.74 (s,

3H);  $^{13}\text{C}$  NMR (101 MHz,  $\text{CDCl}_3$ )  $\delta$  162.52, 147.30, 145.48, 129.58, 129.33, 127.52, 126.09, 123.75, 118.21, 83.62, 69.20, 29.02, 18.93; HRMS (ESI)  $m/z$  calculated for  $\text{C}_{13}\text{H}_{14}\text{ON}$   $[(\text{M}+\text{H})^+]$  200.1070, found 200.1069. IR (film) 3062, 2885, 1601, 1562, 1508, 1448, 1412, 1348, 1306, 1226, 1038, 980  $760\text{ cm}^{-1}$ . Spectra data are consistent with those reported in the literature: *Org. Lett.* **2019**, *21*, DOI: [acs.orglett.9b01635](https://doi.org/10.1021/acs.orglett.9b01635).

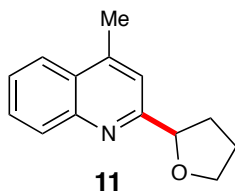

**4-Methyl-2-(tetrahydrofuran-2-yl)quinoline (11):** According to the general procedure, lepidine (71.6 mg, 0.50 mmol, 1.0 equiv.), 5.0 mL of MeCN,  $\text{H}_2\text{O}_2$  (0.1 mL, 1.0 mmol, 2.0 equiv.), HCl (86.0  $\mu\text{L}$ , 1.0 mmol, 2.0 equiv.), tetrahydrofuran (0.91 mL, 10.0 mmol, 20.0 equiv.) were used. After 18 hours, the reaction mixture was subjected to the workup procedure outlined in the general procedure and purified by flash chromatography (20% ethyl acetate/hexanes) to provide the title compound as a colorless oil (69.3 mg, 65% yield).  $^1\text{H}$  NMR (400 MHz,  $\text{CDCl}_3$ )  $\delta$  8.05 (d,  $J = 8.4$  Hz, 1H), 7.96 (d,  $J = 8.3$  Hz, 1H), 7.68 (ddd,  $J = 8.4, 6.8, 1.4$  Hz, 1H), 7.52 (ddd,  $J = 8.2, 6.8, 1.3$  Hz, 1H), 7.44 (s, 1H), 5.14 (t,  $J = 6.9$  Hz, 1H), 4.21 – 4.13 (m, 1H), 4.07 – 3.99 (m, 1H), 2.70 (s, 3H), 2.56 – 2.45 (m, 1H), 2.11 – 1.98 (m, 3H);  $^{13}\text{C}$  NMR (101 MHz,  $\text{CDCl}_3$ )  $\delta$  163.03, 147.21, 144.97, 129.44, 129.11, 127.40, 125.78, 123.65, 118.53, 82.00, 69.22, 33.30, 25.93, 18.87. Spectra data are consistent with those reported in the literature: *Synlett*, **2016**, *27*, 1282-1286.

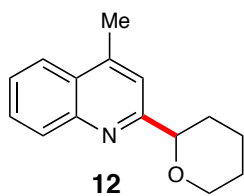

**4-Methyl-2-(tetrahydro-2H-pyran-2-yl)quinoline (12):** According to the general procedure, lepidine (71.6 mg, 0.50 mmol, 1.0 equiv.), 5.0 mL of MeCN, H<sub>2</sub>O<sub>2</sub> (0.1 mL, 1.0 mmol, 2.0 equiv.), HCl (86.0 μL, 1.0 mmol, 2.0 equiv.), tetrahydro- 2H-pyran (1.10 ml, 10.0 mmol, 20.0 equiv.) were used. After 18 hours, the reaction mixture was subjected to the workup procedure outlined in the general procedure and purified by flash chromatography (20% ethyl acetate/hexanes) to provide the title compound as a colorless oil (76.1 mg, 67% yield). <sup>1</sup>H NMR (400 MHz, CDCl<sub>3</sub>) δ 8.05 (d, *J* = 8.4 Hz, 1H), 7.93 (d, *J* = 8.3 Hz, 1H), 7.65 (ddd, *J* = 8.4, 6.8, 1.4 Hz, 1H), 7.48 (ddd, *J* = 8.3, 6.8, 1.3 Hz, 1H), 7.45 (s, 1H), 4.59 (dd, *J* = 11.1, 2.3 Hz, 1H), 4.24 – 4.15 (m, 1H), 3.67 (td, *J* = 11.6, 2.5 Hz, 1H), 2.67 (s, 3H), 2.09 (dt, *J* = 12.5, 2.1 Hz, 1H), 2.00 – 1.91 (m, 1H), 1.80 – 1.68 (m, 2H), 1.67 – 1.52 (m, 2H); <sup>13</sup>C NMR (101 MHz, CDCl<sub>3</sub>) δ 161.99, 146.99, 144.86, 129.46, 128.93, 127.37, 125.70, 123.50, 118.67, 81.47, 68.75, 32.65, 25.73, 23.60, 18.70. Spectra data are consistent with those reported in the literature: *Angew. Chem. Int. Ed.* **2015**, *54*, 1565-1569.

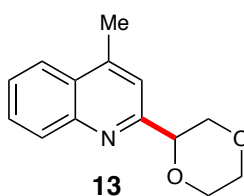

**2-(1,4-Dioxan-2-yl)-4-methylquinoline (13):** According to the general procedure, lepidine (71.6 mg, 0.50 mmol, 1.0 equiv.), 5.0 mL of MeCN, H<sub>2</sub>O<sub>2</sub> (0.1 mL, 1.0 mmol, 2.0 equiv.), HCl (86.0 μL, 1.0 mmol, 2.0 equiv.), 1,4-dioxane (0.94 ml, 10.0 mmol, 20.0

equiv.) were used. After 18 hours, the reaction mixture was subjected to the workup procedure outlined in the general procedure and purified by flash chromatography (20% ethyl acetate/hexanes) to provide the title compound as a white solid (86.0 mg, 75% yield).  $^1\text{H}$  NMR (400 MHz,  $\text{CDCl}_3$ )  $\delta$  8.05 (d,  $J = 8.3$  Hz, 1H), 7.93 (d,  $J = 8.3$  Hz, 1H), 7.66 (ddd,  $J = 8.4, 6.8, 1.4$  Hz, 1H), 7.50 (ddd,  $J = 8.3, 6.8, 1.3$  Hz, 1H), 7.43 (s, 1H), 4.87 (dd,  $J = 10.1, 2.9$  Hz, 1H), 4.22 (dd,  $J = 11.6, 3.0$  Hz, 1H), 4.03 – 3.91 (m, 2H), 3.84 – 3.71 (m, 2H), 3.61 (dd,  $J = 11.6, 10.1$  Hz, 1H), 2.67 (s, 3H);  $^{13}\text{C}$  NMR (101 MHz,  $\text{CDCl}_3$ )  $\delta$  157.67, 147.11, 145.00, 129.62, 129.11, 127.44, 126.05, 123.53, 118.95, 78.60, 70.94, 66.91, 66.26, 18.68. Spectra data are consistent with those reported in the literature: *Synlett*, **2016**, 27, 1282-1286.

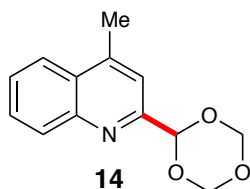

**4-Methyl-2-(1,3,5-trioxan-2-yl)quinoline (14):** According to the general procedure, lepidine (71.6 mg, 0.50 mmol, 1.0 equiv.), 5.0 mL of MeCN,  $\text{H}_2\text{O}_2$  (0.1 mL, 1.0 mmol, 2.0 equiv.), HCl (86.0  $\mu\text{L}$ , 1.0 mmol, 2.0 equiv.), 1,3,5-trioxane (675 mg, 7.5 mmol, 15.0 equiv.) were used. After 18 hours, the reaction mixture was subjected to the workup procedure outlined in the general procedure and purified by flash chromatography (20% ethyl acetate/hexanes) to provide the title compound as a white solid (41.6 mg, 36% yield).  $^1\text{H}$  NMR (400 MHz,  $\text{CDCl}_3$ )  $\delta$  8.14 (d,  $J = 8.4$  Hz, 1H), 8.01 (d,  $J = 8.3$  Hz, 1H), 7.72 (ddd,  $J = 8.4, 6.8, 1.5$  Hz, 1H), 7.66 (s, 1H), 7.59 (ddd,  $J = 8.3, 6.9, 1.3$  Hz, 1H), 6.08 (s, 1H), 5.45 – 5.37 (m, 4H), 2.75 (s, 3H);  $^{13}\text{C}$  NMR (101 MHz,  $\text{CDCl}_3$ )  $\delta$  154.77, 146.99, 145.99, 130.10, 129.48, 128.36, 126.96, 123.72, 118.83, 102.12, 93.69, 18.90.

Spectra data are consistent with those reported in the literature: *Bioorg. Med. Chem. Lett.*

**2012**, 22, 3480-3484.

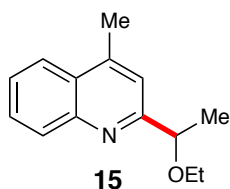

**2-(1-Ethoxyethyl)-4-methylquinoline (15):** According to the general procedure, lepidine (71.6 mg, 0.50 mmol, 1.0 equiv.), 5.0 mL of MeCN, H<sub>2</sub>O<sub>2</sub> (0.1 mL, 1.0 mmol, 2.0 equiv.), HCl (86.0  $\mu$ L, 1.0 mmol, 2.0 equiv.), ethoxyethane (1.04 mL, 10.0 mmol, 20.0 equiv.) were used. After 18 hours, the reaction mixture was subjected to the workup procedure outlined in the general procedure and purified by flash chromatography (10% ethyl acetate/hexanes) to provide the title compound as a colorless oil (92.9 mg, 77% yield). <sup>1</sup>H NMR (400 MHz, CDCl<sub>3</sub>)  $\delta$  8.06 (d,  $J$  = 8.4 Hz, 1H), 7.98 (d,  $J$  = 8.3 Hz, 1H), 7.69 (ddd,  $J$  = 8.4, 6.8, 1.4 Hz, 1H), 7.54 (ddd,  $J$  = 8.3, 6.9, 1.3 Hz, 1H), 7.44 (s, 1H), 4.67 (q,  $J$  = 6.6 Hz, 1H), 3.51 (dq,  $J$  = 9.3, 7.0 Hz, 1H), 3.41 (dq,  $J$  = 9.3, 7.0 Hz, 1H), 2.73 (s, 3H), 1.53 (d,  $J$  = 6.6 Hz, 3H), 1.23 (t,  $J$  = 7.0 Hz, 3H); <sup>13</sup>C NMR (101 MHz, CDCl<sub>3</sub>)  $\delta$  163.95, 147.10, 145.26, 129.45, 129.16, 127.62, 125.96, 123.68, 118.26, 79.67, 64.61, 22.66, 18.98, 15.45. Spectra data are consistent with those reported in the literature: *Synlett*, **2016**, 27, 1282-1286.

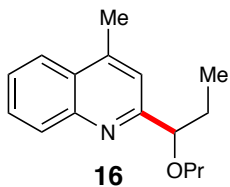

**4-Methyl-2-(1-propoxypropyl)quinoline (16):** According to the general procedure, lepidine (71.6 mg, 0.50 mmol, 1.0 equiv.), 5.0 mL of MeCN, H<sub>2</sub>O<sub>2</sub> (0.1 mL, 1.0 mmol,

2.0 equiv.), HCl (86.0  $\mu$ L, 1.0 mmol, 2.0 equiv.), 1-propoxypropane (1.39 ml, 10.0 mmol, 20.0 equiv.) were used. After 18 hours, the reaction mixture was subjected to the workup procedure outlined in the general procedure and purified by flash chromatography (10% ethyl acetate/hexanes) to provide the title compound as a colorless oil (86.4 mg, 71% yield).  $^1\text{H}$  NMR (400 MHz,  $\text{CDCl}_3$ )  $\delta$  8.06 (d,  $J$  = 8.4 Hz, 1H), 7.95 (d,  $J$  = 7.9 Hz, 1H), 7.66 (ddd,  $J$  = 8.4, 6.9, 1.5 Hz, 1H), 7.50 (ddd,  $J$  = 8.2, 6.9, 1.3 Hz, 1H), 7.40 (s, 1H), 4.40 (dd,  $J$  = 7.9, 5.5 Hz, 1H), 3.34 (td,  $J$  = 6.6, 1.6 Hz, 2H), 2.69 (s, 3H), 1.95 – 1.74 (m, 2H), 1.61 (h,  $J$  = 7.1 Hz, 2H), 0.99 (t,  $J$  = 7.4 Hz, 3H), 0.90 (t,  $J$  = 7.4 Hz, 3H);  $^{13}\text{C}$  NMR (101 MHz,  $\text{CDCl}_3$ )  $\delta$  163.31, 147.09, 144.72, 129.44, 128.95, 127.53, 125.78, 123.57, 118.71, 85.16, 71.21, 29.92, 23.02, 18.84, 10.55, 10.19. Spectra data are consistent with those reported in the literature: *Eur. J. Org. Chem.* **2015**, 2015, 4973-4981.

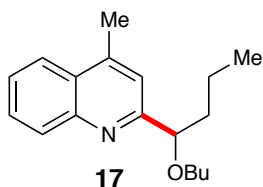

**2-(1-Butoxybutyl)-4-methylquinoline (17):** According to the general procedure, lepidine (71.6 mg, 0.50 mmol, 1.0 equiv.), 5.0 mL of MeCN,  $\text{H}_2\text{O}_2$  (0.1 mL, 1.0 mmol, 2.0 equiv.), HCl (86.0  $\mu$ L, 1.0 mmol, 2.0 equiv.), 1-butoxybutane (1.70 ml, 10.0 mmol, 20.0 equiv.) were used. After 18 hours, the reaction mixture was subjected to the workup procedure outlined in the general procedure and purified by flash chromatography (10% ethyl acetate/hexanes) to provide the title compound as a colorless oil (74.6 mg, 55% yield).  $^1\text{H}$  NMR (400 MHz,  $\text{CDCl}_3$ )  $\delta$  8.07 (d,  $J$  = 8.4 Hz, 1H), 7.97 (d,  $J$  = 8.2 Hz, 1H), 7.68 (ddd,  $J$  = 8.4, 6.8, 1.4 Hz, 1H), 7.52 (ddd,  $J$  = 8.3, 6.9, 1.3 Hz, 1H), 7.41 (s, 1H), 4.48 (dd,  $J$  = 8.5, 4.9 Hz, 1H), 3.37 (t,  $J$  = 6.6 Hz, 2H), 2.71 (s, 3H), 1.89 – 1.77 (m, 1H),



1.77 – 1.66 (m, 1H), 1.63 – 1.50 (m, 3H), 1.46 – 1.33 (m, 3H), 0.93 (t,  $J = 7.4$  Hz, 3H), 0.88 (t,  $J = 7.4$  Hz, 3H);  $^{13}\text{C}$  NMR (101 MHz,  $\text{CDCl}_3$ )  $\delta$  163.63, 147.14, 144.84, 129.51, 129.02, 127.59, 125.84, 123.64, 118.73, 83.85, 69.30, 39.20, 31.98, 19.31, 19.13, 18.92, 13.97, 13.82. Spectra data are consistent with those reported in the literature: *Synlett*, **2016**, 27, 1282-1286.

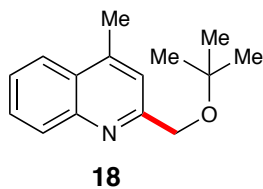

**2-(tert-Butoxymethyl)-4-methylquinoline (18):** According to the general procedure, lepidine (71.6 mg, 0.50 mmol, 1.0 equiv.), 5.0 mL of MeCN,  $\text{H}_2\text{O}_2$  (0.1 mL, 1.0 mmol, 2.0 equiv.), HCl (86.0  $\mu\text{L}$ , 1.0 mmol, 2.0 equiv.), 2-methoxy-2-methylpropane (1.19 mL, 10.0 mmol, 20.0 equiv.) were used. After 18 hours, the reaction mixture was subjected to the workup procedure outlined in the general procedure and purified by flash chromatography (10% ethyl acetate/hexanes) to provide the title compound as a colorless oil (55.0 mg, 48% yield);  $^1\text{H}$  NMR (400 MHz,  $\text{CDCl}_3$ )  $\delta$  8.02 (d,  $J = 8.4$  Hz, 1H), 7.94 (d,  $J = 7.8$  Hz, 1H), 7.65 (ddd,  $J = 8.4, 6.8, 1.5$  Hz, 1H), 7.52 – 7.45 (m, 2H), 4.71 (s, 2H), 2.68 (s, 3H), 1.32 (s, 9H);  $^{13}\text{C}$  NMR (101 MHz,  $\text{CDCl}_3$ )  $\delta$  160.18, 147.07, 144.69, 129.21, 129.02, 127.37, 125.68, 123.61, 119.99, 73.91, 65.93, 27.60, 18.76; HRMS (ESI)  $m/z$  calculated for  $\text{C}_{15}\text{H}_{20}\text{NO}$   $[(\text{M}+\text{H})^+]$  230.1539, found 230.1538. IR (film) 2974, 2931, 1603, 1565, 1509, 1448, 1390, 1363, 1250, 1194, 1096, 758  $\text{cm}^{-1}$ .

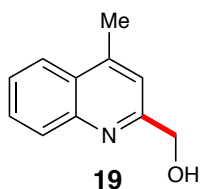

**(4-Methylquinolin-2-yl)methanol (19):** According to the general procedure, lepidine (71.6 mg, 0.50 mmol, 1.0 equiv.), 5.0 mL of MeCN, H<sub>2</sub>O<sub>2</sub> (0.1 mL, 1.0 mmol, 2.0 equiv.), HCl (86.0 μL, 1.0 mmol, 2.0 equiv.), methanol (0.30 ml, 7.5 mmol, 15.0 equiv.) were used. After 18 hours, the reaction mixture was subjected to the workup procedure outlined in the general procedure and purified by flash chromatography (50% ethyl acetate/hexanes) to provide the title compound as a white solid (60.6 mg, 70% yield). <sup>1</sup>H NMR (400 MHz, CDCl<sub>3</sub>) δ 8.06 (d, *J* = 8.4 Hz, 1H), 7.95 (d, *J* = 8.3 Hz, 1H), 7.69 (ddd, *J* = 8.4, 6.9, 1.5 Hz, 1H), 7.54 (ddd, *J* = 8.3, 6.9, 1.3 Hz, 1H), 7.11 (s, 1H), 4.86 (s, 2H), 4.55 (br s, 1H), 2.67 (s, 3H); <sup>13</sup>C NMR (101 MHz, CDCl<sub>3</sub>) δ 158.69, 146.45, 145.09, 129.41, 129.08, 127.57, 126.05, 123.79, 118.96, 64.03, 18.79. Spectra data are consistent with those reported in the literature: *Org. Lett.* **2018**, *20*, 3229-3232.

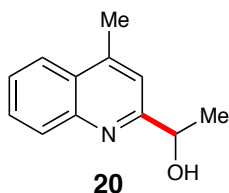

**1-(4-Methylquinolin-2-yl)ethan-1-ol (20):** According to the general procedure, lepidine (71.6 mg, 0.50 mmol, 1.0 equiv.), 5.0 mL of MeCN, H<sub>2</sub>O<sub>2</sub> (0.1 mL, 1.0 mmol, 2.0 equiv.), HCl (86.0 μL, 1.0 mmol, 2.0 equiv.), ethanol (0.44 ml, 7.50 mmol, 15.0 equiv.) were used. After 18 hours, the reaction mixture was subjected to the workup procedure outlined in the general procedure and purified by flash chromatography (30% ethyl acetate/hexanes) to provide the title compound as a white solid (59.0 mg, 63% yield). <sup>1</sup>H NMR (400 MHz, CDCl<sub>3</sub>) δ 8.07 (d, *J* = 8.4 Hz, 1H), 7.97 (d, *J* = 8.3 Hz, 1H), 7.71 (ddd, *J* = 8.4, 6.9, 1.4 Hz, 1H), 7.55 (ddd, *J* = 8.2, 6.9, 1.3 Hz, 1H), 7.18 (s, 1H), 5.14 (br s, 1H), 4.99 (q, *J* = 6.6 Hz, 1H), 2.71 (s, 3H), 1.57 (d, *J* = 6.6 Hz, 3H); <sup>13</sup>C NMR (101 MHz,

CDCl<sub>3</sub>)  $\delta$  162.44, 146.02, 145.32, 129.42, 129.19, 127.41, 126.09, 123.69, 118.53, 68.58, 24.04, 18.91. Spectra data are consistent with those reported in the literature: *Org. Lett.*

**2011**, *13*, 4581-4583.

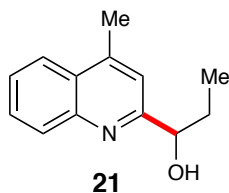

**1-(4-Methylquinolin-2-yl)propan-1-ol (21):** According to the general procedure, lepidine (71.6 mg, 0.50 mmol, 1.0 equiv.), 5.0 mL of MeCN, H<sub>2</sub>O<sub>2</sub> (0.1 mL, 1.0 mmol, 2.0 equiv.), HCl (86.0  $\mu$ L, 1.0 mmol, 2.0 equiv.), 1-Propanol (0.75 ml, 10.0 mmol, 20.0 equiv.) were used. After 18 hours, the reaction mixture was subjected to the workup procedure outlined in the general procedure and purified by flash chromatography (15% ethyl acetate/hexanes) to provide the title compound as a colorless oil (53.3 mg, 53% yield). <sup>1</sup>H NMR (400 MHz, CDCl<sub>3</sub>)  $\delta$  8.07 (d, *J* = 8.4 Hz, 1H), 7.97 (d, *J* = 8.3 Hz, 1H), 7.70 (ddd, *J* = 8.4, 6.9, 1.4 Hz, 1H), 7.55 (ddd, *J* = 8.2, 6.9, 1.3 Hz, 1H), 7.17 (s, 1H), 5.03 (br s, 1H), 4.83 (dd, *J* = 7.1, 4.2 Hz, 1H), 2.70 (s, 3H), 2.03 – 1.94 (m, 1H), 1.76 (dp, *J* = 14.5, 7.3 Hz, 1H), 0.98 (t, *J* = 7.4 Hz, 3H); <sup>13</sup>C NMR (101 MHz, CDCl<sub>3</sub>)  $\delta$  161.50, 146.06, 145.09, 129.36, 129.21, 127.44, 126.05, 123.70, 118.88, 73.31, 30.83, 18.91, 9.28; HRMS (ESI) *m/z* calculated for C<sub>13</sub>H<sub>16</sub>ON [(M+H)<sup>+</sup>] 202.1226, found 202.1226. IR (film) 3370, 2965, 2931, 2875, 1603, 1567, 1509, 1449, 1411, 1095, 1050, 760 cm<sup>-1</sup>.

Spectra data are consistent with those reported in the literature: *Bull. Chem. Soc.*

*Jpn.* **2004**, *77*, 553-559.

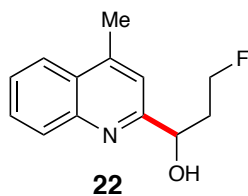

**3-Fluoro-1-(4-methylquinolin-2-yl)propan-1-ol (22):** According to the general procedure, lepidine (71.6 mg, 0.50 mmol, 1.0 equiv.), 5.0 mL of MeCN, H<sub>2</sub>O<sub>2</sub> (0.1 mL, 1.0 mmol, 2.0 equiv.), HCl (86.0 μL, 1.0 mmol, 2.0 equiv.), 3-fluoropropan-1-ol (0.75 ml, 10.0 mmol, 20.0 equiv.) were used. After 18 hours, the reaction mixture was subjected to the workup procedure outlined in the general procedure and purified by flash chromatography (20% ethyl acetate/hexanes) to provide the title compound as a colorless oil (44.9 mg, 41% yield). <sup>1</sup>H NMR (400 MHz, CDCl<sub>3</sub>) δ 8.07 (d, *J* = 7.9 Hz, 1H), 7.99 (d, *J* = 8.3 Hz, 1H), 7.72 (ddd, *J* = 8.4, 6.9, 1.5 Hz, 1H), 7.57 (ddd, *J* = 8.3, 6.8, 1.3 Hz, 1H), 7.20 (s, 1H), 5.03 (dd, *J* = 9.0, 3.3 Hz, 1H), 4.92 – 4.74 (m, 1H), 4.74 – 4.55 (m, 1H), 2.72 (s, 3H), 2.47 – 2.28 (m, 1H), 2.06 – 1.90 (m, 1H); <sup>13</sup>C NMR (101 MHz, CDCl<sub>3</sub>) δ 160.71, 146.12, 145.57, 129.58, 129.19, 127.59, 126.30, 123.80, 118.73, 81.12 (d), 68.73 (d), 39.02 (d), 18.95; HRMS (ESI) *m/z* calculated for C<sub>18</sub>H<sub>26</sub>N<sub>3</sub> [(M+H)<sup>+</sup>] 284.2121, found 284.2119. IR (film) 3344, 2918, 2850, 1603, 1508, 1452, 1412, 1384, 1336, 1229, 1104, 1034, 760 cm<sup>-1</sup>.

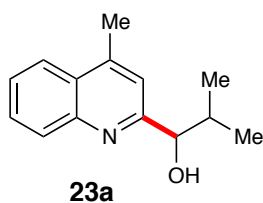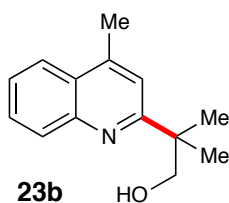

**2-Methyl-1-(4-methylquinolin-2-yl)propan-1-ol (23a) and 2-Methyl-2-(4-methylquinolin-2-yl)propan-1-ol (23b):** According to the general procedure, lepidine (71.6 mg, 0.50 mmol, 1.0 equiv.), 5.0 mL of MeCN, H<sub>2</sub>O<sub>2</sub> (0.1 mL, 1.0 mmol, 2.0

equiv.), HCl (86.0  $\mu$ L, 1.0 mmol, 2.0 equiv.), 2-methylpropan-1-ol (0.92 ml, 10.0 mmol, 20.0 equiv.) were used. After 18 hours, the reaction mixture was subjected to the workup procedure outlined in the general procedure and purified by flash chromatography (20% ethyl acetate/hexanes) to provide the title compounds as an oil mixture of 62.4 mg, 58% total yield (33% yield for **23a**; 25% yield for **23b**). HRMS (ESI)  $m/z$  calculated for  $C_{14}H_{18}NO$  [(M+H)<sup>+</sup>] 216.1383, found 216.1381. IR (film) 3385, 2961, 2871, 1603, 1560, 1448, 1411, 1051, 1018, 759  $cm^{-1}$ .

Compound **23a**: <sup>1</sup>H NMR (400 MHz, CDCl<sub>3</sub>)  $\delta$  8.04 (d,  $J$  = 8.3 Hz, 1H), 7.92 (d,  $J$  = 8.4 Hz, 1H), 7.68 – 7.60 (m, 1H), 7.54 – 7.45 (m, 1H), 7.13 (s, 1H), 5.02 (br s, 1H), 4.68 (d,  $J$  = 3.6 Hz, 1H), 2.65 (s, 3H), 2.21 – 2.08 (m, 1H), 1.11 (d,  $J$  = 6.9 Hz, 3H), 0.73 (d,  $J$  = 6.8 Hz, 3H); <sup>13</sup>C NMR (101 MHz, CDCl<sub>3</sub>)  $\delta$  161.08, 145.91, 144.74, 129.18, 129.14, 127.34, 125.92, 123.60, 119.21, 76.74, 34.53, 19.83, 18.79, 15.47.

Compound **23b**: <sup>1</sup>H NMR (400 MHz, CDCl<sub>3</sub>)  $\delta$  7.95 (d,  $J$  = 8.4 Hz, 1H), 7.90 (d,  $J$  = 8.4 Hz, 1H), 7.68 – 7.60 (m, 1H), 7.54 – 7.45 (m, 1H), 7.24 (s, 1H), 3.86 (s, 2H), 2.65 (s, 3H), 1.37 (s, 6H); <sup>13</sup>C NMR (101 MHz, cdcl<sub>3</sub>)  $\delta$  168.20, 145.96, 145.02, 129.24, 129.16, 126.54, 125.83, 123.41, 119.38, 71.71, 41.50, 25.54, 18.87.

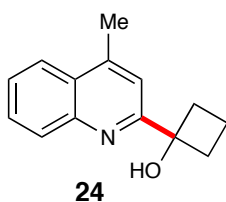

**1-(4-Methylquinolin-2-yl)cyclobutan-1-ol (24)**: According to the general procedure, lepidine (71.6 mg, 0.50 mmol, 1.0 equiv.), 5.0 mL of MeCN, H<sub>2</sub>O<sub>2</sub> (0.1 mL, 1.0 mmol, 2.0 equiv.), HCl (86.0  $\mu$ L, 1.0 mmol, 2.0 equiv.), cyclobutanol (0.78 ml, 10.0 mmol, 20.0 equiv.) were used. After 18 hours, the reaction mixture was subjected to the workup

procedure outlined in the general procedure and purified by flash chromatography (10% ethyl acetate/hexanes) to provide the title compound as a light yellow solid (25.6 mg, 24% yield).  $^1\text{H}$  NMR (400 MHz,  $\text{CDCl}_3$ )  $\delta$  8.05 (d,  $J = 8.4$  Hz, 1H), 7.98 (d,  $J = 7.8$  Hz, 1H), 7.70 (ddd,  $J = 8.4, 6.9, 1.5$  Hz, 1H), 7.60 – 7.50 (m, 2H), 6.13 (br s, 1H), 2.77 (s, 3H), 2.72 – 2.54 (m, 4H), 2.25 – 2.10 (m, 1H), 2.08 – 1.95 (m, 1H);  $^{13}\text{C}$  NMR (101 MHz,  $\text{CDCl}_3$ )  $\delta$  163.65, 146.00, 145.24, 129.52, 129.24, 127.20, 126.10, 123.54, 117.28, 75.46, 37.44, 19.16, 13.30; HRMS (ESI)  $m/z$  calculated for  $\text{C}_{18}\text{H}_{26}\text{N}_3$  [(M+H) $^+$ ] 284.2121, found 284.2119. IR (film) 3374, 2985, 2936, 1603, 1562, 1508, 1447, 1408, 1249, 1151, 1124, 1088, 759  $\text{cm}^{-1}$ .

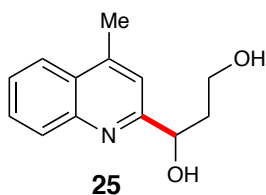

**1-(4-Methylquinolin-2-yl)propane-1,3-diol (25):** According to the general procedure, lepidine (71.6 mg, 0.50 mmol, 1.0 equiv.), 5.0 mL of MeCN,  $\text{H}_2\text{O}_2$  (0.1 mL, 1.0 mmol, 2.0 equiv.), HCl (86.0  $\mu\text{L}$ , 1.0 mmol, 2.0 equiv.), propane-1,3-diol (0.72 mL, 10.0 mmol, 20.0 equiv.) were used. After 18 hours, the reaction mixture was subjected to the workup procedure outlined in the general procedure and purified by flash chromatography (50% ethyl acetate/hexanes) to provide the title compound as a white solid (69.5 mg, 64% yield).  $^1\text{H}$  NMR (400 MHz,  $\text{CDCl}_3$ )  $\delta$  8.02 (d,  $J = 8.4$  Hz, 1H), 7.95 (d,  $J = 8.2$  Hz, 1H), 7.68 (t,  $J = 7.6$  Hz, 1H), 7.53 (t,  $J = 7.4$  Hz, 1H), 7.25 (s, 1H), 5.11 (dd,  $J = 8.9, 3.6$  Hz, 1H), 3.91 (t,  $J = 5.6$  Hz, 2H), 2.67 (s, 3H), 2.24–2.12 (m, 1H), 1.98 – 1.85 (m, 1H);  $^{13}\text{C}$  NMR (101 MHz,  $\text{CDCl}_3$ )  $\delta$  161.36, 146.03, 145.61, 129.48, 129.01, 127.45, 126.18, 123.71, 118.65, 72.17, 60.54, 39.70, 18.87; HRMS (ESI)  $m/z$  calculated for  $\text{C}_{13}\text{H}_{16}\text{NO}_2$

$[(M+H)^+]$  218.1176, found 218.1174. IR (film) 3385, 2925, 1691, 1603, 1567, 1510, 1447, 1413, 1054, 909, 760  $\text{cm}^{-1}$ .

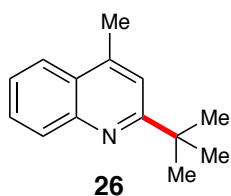

**2-(*tert*-Butyl)-4-methylquinoline (26):** According to the general procedure, lepidine (71.6 mg, 0.50 mmol, 1.0 equiv.), 5.0 mL of MeCN,  $\text{H}_2\text{O}_2$  (0.1 mL, 1.0 mmol, 2.0 equiv.), HCl (86.0  $\mu\text{L}$ , 1.0 mmol, 2.0 equiv.), pivalaldehyde (1.09 ml, 10.0 mmol, 20.0 equiv.) were used. After 18 hours, the reaction mixture was subjected to the workup procedure outlined in the general procedure and purified by flash chromatography (10% ethyl acetate/hexanes) to provide the title compound as a colorless oil (95.7 mg, 96% yield).  $^1\text{H}$  NMR (400 MHz,  $\text{CDCl}_3$ )  $\delta$  8.09 (d,  $J = 8.4$  Hz, 1H), 7.95 (d,  $J = 8.3$  Hz, 1H), 7.67 (ddd,  $J = 8.4, 6.9, 1.5$  Hz, 1H), 7.50 (ddd,  $J = 8.3, 6.8, 1.3$  Hz, 1H), 7.37 (s, 1H), 2.70 (s, 3H), 1.49 (s, 9H);  $^{13}\text{C}$  NMR (101 MHz,  $\text{CDCl}_3$ )  $\delta$  168.86, 147.22, 143.59, 129.86, 128.65, 126.49, 125.34, 123.33, 118.84, 37.86, 30.08, 18.91. Spectra data are consistent with those reported in the literature: *Org. Lett.* **2018**, *20*, 3229-3232.

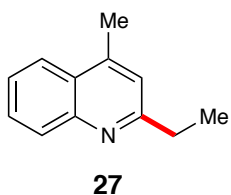

**2-Ethyl-4-methylquinoline (27):** According to the general procedure, lepidine (71.6 mg, 0.50 mmol, 1.0 equiv.), 5.0 mL of MeCN,  $\text{H}_2\text{O}_2$  (0.1 mL, 1.0 mmol, 2.0 equiv.), HCl (86.0  $\mu\text{L}$ , 1.0 mmol, 2.0 equiv.), propionaldehyde (0.72 ml, 10.0 mmol, 20.0 equiv.) were used. After 18 hours, the reaction mixture was subjected to the workup procedure

outlined in the general procedure and purified by flash chromatography (10% ethyl acetate/hexanes) to provide the title compound as a colorless oil (47.9 mg, 59% yield).  $^1\text{H}$  NMR (400 MHz,  $\text{CDCl}_3$ )  $\delta$  8.05 (d,  $J = 8.3$  Hz, 1H), 7.94 (d,  $J = 8.3$  Hz, 1H), 7.66 (ddd,  $J = 8.4, 6.9, 1.5$  Hz, 1H), 7.49 (ddd,  $J = 8.2, 6.8, 1.3$  Hz, 1H), 7.15 (s, 1H), 2.95 (q,  $J = 7.7$  Hz, 2H), 2.67 (s, 3H), 1.38 (t,  $J = 7.7$  Hz, 3H);  $^{13}\text{C}$  NMR (101 MHz,  $\text{CDCl}_3$ )  $\delta$  163.64, 147.56, 144.39, 129.20, 129.02, 126.75, 125.39, 123.54, 121.50, 32.13, 18.66, 14.02. Spectra data are consistent with those reported in the literature: *Org. Lett.* **2018**, *20*, 3229-3232.

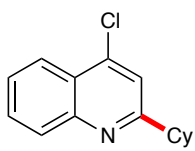

**28**

**4-Chloro-2-cyclohexylquinoline (28):** According to the general procedure, 4-chloroquinoline (81.8 mg, 0.50 mmol, 1.0 equiv.), 5.0 mL of MeCN,  $\text{H}_2\text{O}_2$  (0.1 mL, 1.0 mmol, 2.0 equiv.), HCl (86.0  $\mu\text{L}$ , 1.0 mmol, 2.0 equiv.), cyclohexane (1.10 mL, 10.0 mmol, 20.0 equiv.) were used. After 24 hours, the reaction mixture was subjected to the workup procedure outlined in the general procedure and purified by flash chromatography (10% ethyl acetate/hexanes) to provide the title compound as a colorless oil (103.3 mg, 84% yield).  $^1\text{H}$  NMR (400 MHz,  $\text{CDCl}_3$ )  $\delta$  8.14 (d,  $J = 8.4$  Hz, 1H), 8.04 (d,  $J = 8.2$  Hz, 1H), 7.69 (ddd,  $J = 8.5, 6.9, 1.5$  Hz, 1H), 7.52 (ddd,  $J = 8.2, 6.9, 1.2$  Hz, 1H), 7.39 (s, 1H), 2.86 (tt,  $J = 12.0, 3.5$  Hz, 1H), 2.05 – 1.95 (m, 2H), 1.92 – 1.82 (m, 2H), 1.81 – 1.70 (m, 1H), 1.65 – 1.51 (m, 2H), 1.50 – 1.37 (m, 2H), 1.36 – 1.23 (m, 1H);  $^{13}\text{C}$  NMR (101 MHz,  $\text{CDCl}_3$ )  $\delta$  166.64, 148.53, 142.46, 130.01, 129.18, 126.44, 124.98,



123.73, 119.66, 47.25, 32.55, 26.31, 25.88. Spectra data are consistent with those reported in the literature: *Org. Lett.* **2018**, *20*, 4686-4690.

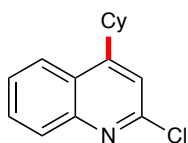

**29**

**2-Chloro-4-cyclohexylquinoline (29):** According to the general procedure, 2-chloroquinoline (81.8 mg, 0.50 mmol, 1.0 equiv.), 5.0 mL of MeCN, H<sub>2</sub>O<sub>2</sub> (0.1 mL, 1.0 mmol, 2.0 equiv.), HCl (86.0 μL, 1.0 mmol, 2.0 equiv.), cyclohexane (1.10 mL, 10.0 mmol, 20.0 equiv.) were used. After 24 hours, the reaction mixture was subjected to the workup procedure outlined in the general procedure and purified by flash chromatography (10% ethyl acetate/hexanes) to provide the title compound as a white solid (116.7 mg, 95% yield). <sup>1</sup>H NMR (400 MHz, CDCl<sub>3</sub>) δ 7.99 (dd, J = 8.4, 1.6 Hz, 2H), 7.66 (ddd, J = 8.4, 6.8, 1.4 Hz, 1H), 7.51 (ddd, J = 8.3, 6.8, 1.3 Hz, 1H), 7.22 (s, 1H), 3.24 (tt, J = 11.4, 3.0 Hz, 1H), 2.00 – 1.92 (m, 2H), 1.92 – 1.86 (m, 2H), 1.86 – 1.78 (m, 1H), 1.56 – 1.41 (m, 4H), 1.36 – 1.24 (m, 1H); <sup>13</sup>C NMR (101 MHz, CDCl<sub>3</sub>) δ 156.78, 150.93, 148.02, 129.79, 129.33, 126.39, 125.45, 123.02, 118.54, 38.93, 33.24, 26.62, 25.99. Spectra data are consistent with those reported in the literature: *Angew. Chem. Int. Ed.* **2013**, *52*, 3267-3271.

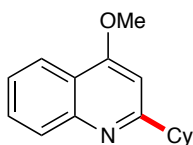

**30**

**2-Cyclohexyl-4-methoxyquinoline (30):** According to the general procedure, 4-methoxyquinoline (79.6 mg, 0.50 mmol, 1.0 equiv.), 5.0 mL of MeCN, H<sub>2</sub>O<sub>2</sub> (0.1 mL,

1.0 mmol, 2.0 equiv.), HCl (86.0  $\mu$ L, 1.0 mmol, 2.0 equiv.), cyclohexane (1.10 ml, 10.0 mmol, 20.0 equiv.) were used. After 24 hours, the reaction mixture was subjected to the workup procedure outlined in the general procedure and purified by flash chromatography (10% ethyl acetate/hexanes) to provide the title compound as a colorless oil (51.9 mg, 43% yield).  $^1\text{H}$  NMR (400 MHz,  $\text{CDCl}_3$ )  $\delta$  8.12 (d,  $J = 8.3$  Hz, 1H), 7.98 (d,  $J = 8.3$  Hz, 1H), 7.63 (ddd,  $J = 8.4, 6.8, 1.5$  Hz, 1H), 7.41 (ddd,  $J = 8.2, 6.9, 1.2$  Hz, 1H), 6.63 (s, 1H), 4.01 (s, 3H), 2.87 (tt,  $J = 12.0, 3.4$  Hz, 1H), 2.11 – 1.95 (m, 2H), 1.94 – 1.82 (m, 2H), 1.82 – 1.74 (m, 1H), 1.62 (qd,  $J = 12.4, 3.1$  Hz, 2H), 1.53 – 1.40 (m, 2H), 1.40 – 1.28 (m, 1H);  $^{13}\text{C}$  NMR (101 MHz,  $\text{CDCl}_3$ )  $\delta$  168.05, 162.36, 148.55, 129.47, 128.28, 124.62, 121.46, 120.16, 97.84, 55.34, 48.13, 32.83, 26.46, 26.01. Spectra data are consistent with those reported in the literature: *Org. Lett.* **2019**, *21*, DOI: [acs.orglett.9b01635](https://doi.org/10.1021/acs.orglett.9b01635).

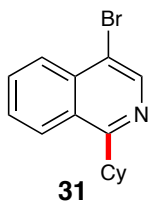

**4-Bromo-1-cyclohexylisoquinoline (31):** According to the general procedure, 4-bromoisoquinoline (104.0 mg, 0.50 mmol, 1.0 equiv.), 5.0 mL of MeCN,  $\text{H}_2\text{O}_2$  (0.1 mL, 1.0 mmol, 2.0 equiv.), HCl (86.0  $\mu$ L, 1.0 mmol, 2.0 equiv.), cyclohexane (1.10 ml, 10.0 mmol, 20.0 equiv.) were used. After 18 hours, the reaction mixture was subjected to the workup procedure outlined in the general procedure and purified by flash chromatography (10% ethyl acetate/hexanes) to provide the title compound as a colorless oil (105.9 mg, 73% yield).  $^1\text{H}$  NMR (400 MHz,  $\text{CDCl}_3$ )  $\delta$  8.65 (s, 1H), 8.22 (d,  $J = 8.5$  Hz, 1H), 8.18 (d,  $J = 8.4$  Hz, 1H), 7.76 (ddd,  $J = 8.3, 6.8, 1.2$  Hz, 1H), 7.64 (ddd,  $J = 8.3,$

6.9, 1.3 Hz, 1H), 3.52 (tt,  $J = 11.7, 3.2$  Hz, 1H), 2.02 – 1.88 (m, 4H), 1.86 – 1.75 (m, 3H), 1.60 – 1.45 (m, 2H), 1.44 – 1.33 (m, 1H);  $^{13}\text{C}$  NMR (101 MHz,  $\text{CDCl}_3$ )  $\delta$  165.31, 143.52, 134.87, 130.79, 127.71, 127.57, 126.83, 125.05, 117.50, 41.44, 32.50, 26.75, 26.12.

Spectra data are consistent with those reported in the literature: *Adv. Synth. Catal.* **2015**, 357, 2055-2060.

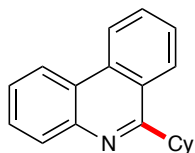

**32**

**6-Cyclohexylphenanthridine (32):** According to the general procedure, phenanthridine (89.6 mg, 0.50 mmol, 1.0 equiv.), 5.0 mL of MeCN,  $\text{H}_2\text{O}_2$  (0.1 mL, 1.0 mmol, 2.0 equiv.), HCl (86.0  $\mu\text{L}$ , 1.0 mmol, 2.0 equiv.), cyclohexane (1.10 mL, 10.0 mmol, 20.0 equiv.) were used. After 24 hours, the reaction mixture was subjected to the workup procedure outlined in the general procedure and purified by flash chromatography (5% ethyl acetate/hexanes) to provide the title compound as a colorless oil (112.4 mg, 86% yield).  $^1\text{H}$  NMR (400 MHz,  $\text{CDCl}_3$ )  $\delta$  8.65 (d,  $J = 8.2$  Hz, 1H), 8.54 (d,  $J = 8.1$  Hz, 1H), 8.32 (d,  $J = 8.2$  Hz, 1H), 8.14 (d,  $J = 8.1$  Hz, 1H), 7.81 (t,  $J = 7.6$  Hz, 1H), 7.70 (q,  $J = 6.7$  Hz, 2H), 7.61 (t,  $J = 7.6$  Hz, 1H), 3.62 (tt,  $J = 11.3, 3.4$  Hz, 1H), 2.14 – 2.03 (m, 2H), 2.03 – 1.89 (m, 4H), 1.89 – 1.81 (m, 1H), 1.63 – 1.51 (m, 2H), 1.50 – 1.41 (m, 1H);  $^{13}\text{C}$  NMR (101 MHz,  $\text{CDCl}_3$ )  $\delta$  165.27, 143.83, 132.98, 129.89, 129.88, 128.35, 127.03, 126.10, 125.59, 124.69, 123.31, 122.54, 121.78, 41.95, 32.26, 26.85, 26.28. Spectra data are consistent with those reported in the literature: *J. Org. Chem.* **2018**, 83, 10015-10024.

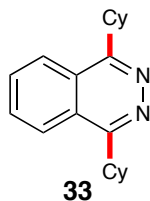

**1,4-Dicyclohexylphthalazine (33):** According to the general procedure, phthalazine (65.1 mg, 0.50 mmol, 1.0 equiv.), 5.0 mL of MeCN, H<sub>2</sub>O<sub>2</sub> (0.1 mL, 1.0 mmol, 2.0 equiv.), HCl (86.0 μL, 1.0 mmol, 2.0 equiv.), cyclohexane (1.10 ml, 10.0 mmol, 20.0 equiv.) were used. After 18 hours, the reaction mixture was subjected to the workup procedure outlined in the general procedure and purified by flash chromatography (20% ethyl acetate/hexanes) to provide the title compound as a yellow solid (136.7 mg, 43% yield). <sup>1</sup>H NMR (400 MHz, CDCl<sub>3</sub>) δ 8.10 (dd, *J* = 6.3, 3.4 Hz, 2H), 7.78 (dd, *J* = 6.3, 3.3 Hz, 2H), 3.41 (tt, *J* = 11.2, 3.6 Hz, 2H), 2.06 – 1.96 (m, 4H), 1.96 – 1.83 (m, 8H), 1.96 – 1.83 (m, 2H), 1.80 – 1.71 (m, 4H), 1.39 – 1.26 (m, 2H); <sup>13</sup>C NMR (101 MHz, CDCl<sub>3</sub>) δ 161.57, 130.94, 124.70, 123.96, 40.22, 32.14, 26.69, 26.06. Spectra data are consistent with those reported in the literature: *Angew. Chem. Int. Ed.* **2013**, *52*, 3267-3271.

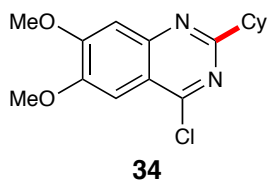

**4-Chloro-2-cyclohexyl-6,7-dimethoxyquinazoline (34):** According to the general procedure, 4-chloro-6,7-dimethoxyquinazoline (112.3 mg, 0.50 mmol, 1.0 equiv.), 5.0 mL of MeCN, H<sub>2</sub>O<sub>2</sub> (0.1 mL, 1.0 mmol, 2.0 equiv.), HCl (86.0 μL, 1.0 mmol, 2.0 equiv.), cyclohexane (1.10 ml, 10.0 mmol, 20.0 equiv.) were used. After 24 hours, the reaction mixture was subjected to the workup procedure outlined in the general procedure and purified by flash chromatography (50% ethyl acetate/hexanes) to provide the title

compound as a colorless oil (104.4 mg, 68% yield).  $^1\text{H}$  NMR (400 MHz,  $\text{CDCl}_3$ )  $\delta$  7.30 (s, 1H), 7.24 (s, 1H), 4.01 (s, 6H), 2.89 (tt,  $J = 11.8, 3.5$  Hz, 1H), 2.08 – 1.95 (m, 2H), 1.90 – 1.81 (m, 2H), 1.75 – 1.61 (m, 3H), 1.45 – 1.24 (m, 3H);  $^{13}\text{C}$  NMR (101 MHz,  $\text{CDCl}_3$ )  $\delta$  168.87, 159.09, 156.44, 150.52, 149.34, 117.31, 106.65, 102.70, 56.50, 56.28, 47.30, 31.80, 26.19, 25.86; HRMS (ESI)  $m/z$  calculated for  $\text{C}_{16}\text{H}_{20}\text{O}_2\text{N}_2\text{Cl}$  [(M+H) $^+$ ] 307.1208, found 307.1206; IR (film) 2924, 2848, 1619, 1570, 1501, 1416, 1293, 1239, 1220, 1162, 848  $\text{cm}^{-1}$ . Spectra data are consistent with those reported in the literature: *Org. Lett.* **2019**, *21*, DOI: [acs.orglett.9b01635](https://doi.org/10.1021/acs.orglett.9b01635).

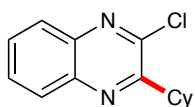

**35**

**2-Chloro-3-cyclohexylquinoxaline (35):** According to the general procedure, 2-chloroquinoxaline (82.3 mg, 0.50 mmol, 1.0 equiv.), 5.0 mL of MeCN,  $\text{H}_2\text{O}_2$  (0.1 mL, 1.0 mmol, 2.0 equiv.), HCl (86.0  $\mu\text{L}$ , 1.0 mmol, 2.0 equiv.), cyclohexane (1.10 mL, 10.0 mmol, 20.0 equiv.) were used. After 24 hours, the reaction mixture was subjected to the workup procedure outlined in the general procedure and purified by flash chromatography (10% ethyl acetate/hexanes) to provide the title compound as a white solid (40.7 mg, 33% yield).  $^1\text{H}$  NMR (400 MHz,  $\text{CDCl}_3$ )  $\delta$  8.08 – 8.00 (m, 1H), 8.00 – 7.92 (m, 1H), 7.76 – 7.64 (m, 2H), 3.34 (tt,  $J = 11.6, 3.3$  Hz, 1H), 2.07 – 1.97 (m, 2H), 1.97 – 1.86 (m, 2H), 1.85 – 1.76 (m, 1H), 1.70 (qd,  $J = 12.6, 3.2$  Hz, 2H), 1.48 (qt,  $J = 12.7, 3.3$  Hz, 2H), 1.35 (qt,  $J = 12.8, 3.3$  Hz, 1H);  $^{13}\text{C}$  NMR (101 MHz,  $\text{CDCl}_3$ )  $\delta$  159.09, 147.40, 141.11, 140.55, 129.77 (2C), 128.74, 128.00, 42.49, 31.20, 26.34, 25.90. Spectra

data are consistent with those reported in the literature: *Angew. Chem. Int. Ed.* **2013**, *52*, 3267-3271.

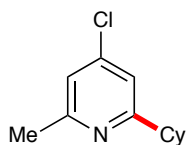

**36**

**4-Chloro-2-cyclohexyl-6-methylpyridine (36):** According to the general procedure, 4-chloro-2-methylpyridine (63.8 mg, 0.50 mmol, 1.0 equiv.), 5.0 mL of MeCN, H<sub>2</sub>O<sub>2</sub> (0.1 mL, 1.0 mmol, 2.0 equiv.), HCl (86.0  $\mu$ L, 1.0 mmol, 2.0 equiv.), cyclohexane (1.10 mL, 10.0 mmol, 20.0 equiv.) were used. The reaction mixture was irradiated under 390 nm blue LEDs, after 24 hours, subjected to the workup procedure outlined in the general procedure and purified by flash chromatography (10% ethyl acetate/hexanes) to provide the title compound as a colorless oil (67.1 mg, 64% yield). <sup>1</sup>H NMR (400 MHz, CDCl<sub>3</sub>)  $\delta$  6.96 (s, 2H), 2.64 (ddt, *J* = 11.5, 6.7, 3.4 Hz, 1H), 2.49 (s, 3H), 1.99 – 1.90 (m, 2H), 1.86 – 1.78 (m, 2H), 1.77 – 1.68 (m, 1H), 1.47 – 1.31 (m, 4H), 1.31 – 1.22 (m, 1H); <sup>13</sup>C NMR (101 MHz, CDCl<sub>3</sub>)  $\delta$  167.64, 158.94, 144.21, 120.71, 117.91, 46.50, 32.85, 26.42, 25.95, 24.35. Spectra data are consistent with those reported in the literature: *Org. Lett.* **2019**, *21*, DOI: [acs.orglett.9b01635](https://doi.org/10.1021/acs.orglett.9b01635).

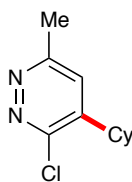

**37**

**3-Chloro-4-cyclohexyl-6-methylpyridazine (37):** According to the general procedure, 3-chloro-6-methylpyridazine (64.3 mg, 0.50 mmol, 1.0 equiv.), 5.0 mL of MeCN, H<sub>2</sub>O<sub>2</sub>

(0.1 mL, 1.0 mmol, 2.0 equiv.), HCl (86.0  $\mu$ L, 1.0 mmol, 2.0 equiv.), cyclohexane (1.10 mL, 10.0 mmol, 20.0 equiv.) were used. The reaction mixture was irradiated under 390 nm blue LEDs, after 18 hours, subjected to the workup procedure outlined in the general procedure and purified by flash chromatography (20% ethyl acetate/hexanes) to provide the title compound as a light yellow solid (86.4 mg, 82% yield).  $^1\text{H}$  NMR (400 MHz,  $\text{CDCl}_3$ )  $\delta$  7.14 (s, 1H), 2.82 (tt,  $J = 11.8, 2.9$  Hz, 1H), 2.63 (s, 3H), 1.95 – 1.81 (m, 4H), 1.81 – 1.72 (m, 1H), 1.42 (qt,  $J = 12.7, 3.5$  Hz, 2H), 1.35 – 1.19 (m, 3H);  $^{13}\text{C}$  NMR (101 MHz,  $\text{CDCl}_3$ )  $\delta$  159.63, 155.42, 145.46, 125.98, 39.53, 31.72, 26.15, 25.65, 21.50.

Spectra data are consistent with those reported in the literature: *J. Heterocyclic Chem.*

**1991**, 28, 583-587.

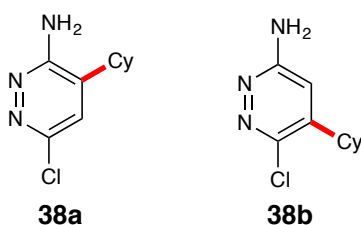

**6-Chloro-4-cyclohexylpyridazin-3-amine (38a) and 6-Chloro-5-cyclohexylpyridazin-3-amine (38b):** According to the general procedure, 6-chloropyridazin-3-amine (64.8 mg, 0.50 mmol, 1.0 equiv.), 5.0 mL of MeCN,  $\text{H}_2\text{O}_2$  (0.1 mL, 1.0 mmol, 2.0 equiv.), HCl (86.0  $\mu$ L, 1.0 mmol, 2.0 equiv.), cyclohexane (1.10 mL, 10.0 mmol, 20.0 equiv.) were used. After 18 hours, the reaction mixture was subjected to the workup procedure outlined in the general procedure and purified by flash chromatography (50% ethyl acetate/hexanes) to provide the title compounds as a white solid (70.9 mg, 67% yield for **38a**) and a white solid (14.8 mg, 14% yield for **38b**).

Compound **38a**:  $^1\text{H}$  NMR (400 MHz,  $\text{CDCl}_3$ )  $\delta$  7.03 (s, 1H), 5.58 (br s, 2H), 2.30 (tt,  $J = 11.4, 3.0$  Hz, 1H), 1.97 – 1.82 (m, 4H), 1.82 – 1.73 (m, 1H), 1.45 – 1.20 (m, 5H);  $^{13}\text{C}$

NMR (101 MHz, CDCl<sub>3</sub>)  $\delta$  158.18, 147.90, 135.88, 125.07, 37.89, 31.09, 26.22, 25.77; HRMS (ESI)  $m/z$  calculated for C<sub>10</sub>H<sub>15</sub>N<sub>3</sub>Cl [(M+H)<sup>+</sup>] 212.0949, found 212.0949. IR (film) 3377, 3312, 3176, 2933, 2853, 1658, 1625, 1599, 1456, 1209, 1150, 962 cm<sup>-1</sup>. Spectra data are consistent with those reported in the literature: *Tetrahedron Lett.* **2015**, *56*, 6791-6794.

Compound **38b**: <sup>1</sup>H NMR (400 MHz, CDCl<sub>3</sub>)  $\delta$  6.64 (s, 1H), 5.06 (br s, 2H), 2.75 (tt,  $J$  = 11.9, 3.0 Hz, 1H), 1.96 – 1.82 (m, 4H), 1.82 – 1.75 (m, 1H), 1.49 – 1.35 (m, 2H), 1.30 – 1.20 (m, 3H); <sup>13</sup>C NMR (101 MHz, CDCl<sub>3</sub>)  $\delta$  159.71, 148.73, 147.27, 113.86, 39.73, 31.86, 26.28, 25.83; HRMS (ESI)  $m/z$  calculated for C<sub>10</sub>H<sub>15</sub>N<sub>3</sub>Cl [(M+H)<sup>+</sup>] 212.0949, found 212.0948. IR (film) 3318, 3160, 2930, 2855, 1658, 1635, 1581, 1533, 1438, 1344, 1107, 935 cm<sup>-1</sup>.

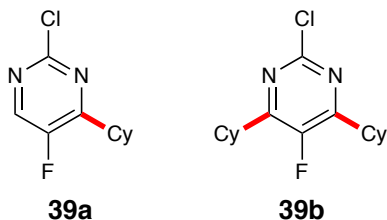

**2-Chloro-4-cyclohexyl-5-fluoropyrimidine (39a) and 2-Chloro-4,6-dicyclohexyl-5-fluoropyrimidine (39b):** According to the general procedure, 2-chloro-5-fluoropyrimidine (68.3 mg, 0.50 mmol, 1.0 equiv.), 5.0 mL of MeCN, H<sub>2</sub>O<sub>2</sub> (0.1 mL, 1.0 mmol, 2.0 equiv.), HCl (86.0  $\mu$ L, 1.0 mmol, 2.0 equiv.), cyclohexane (1.10 mL, 10.0 mmol, 20.0 equiv.) were used. The reaction mixture was irradiated under 390 nm blue LEDs, after 18 hours, subjected to the workup procedure outlined in the general procedure and purified by flash chromatography (10% ethyl acetate/hexanes) to provide the title compounds as a colorless oil (54.7 mg, 51% yield for **39a**) and a white solid (26.7 mg, 18% yield for **39b**).



Compound **39a**:  $^1\text{H}$  NMR (400 MHz,  $\text{CDCl}_3$ )  $\delta$  8.31 (d,  $J = 1.4$  Hz, 1H), 3.05 – 2.92 (m, 1H), 1.91 – 1.76 (m, 4H), 1.76 – 1.69 (m, 1H), 1.69 – 1.57 (m, 2H), 1.44 – 1.22 (m, 3H).  $^{13}\text{C}$  NMR (101 MHz,  $\text{CDCl}_3$ )  $\delta$  165.60 (d), 155.25 (d), 155.07 (d), 146.02 (d), 39.32 (d), 30.24 (d), 25.87, 25.45; HRMS (ESI)  $m/z$  calculated for  $\text{C}_{16}\text{H}_{23}\text{N}_2\text{ClF}$  [(M+H) $^+$ ] 215.0746, found 215.0745. IR (film) 2932, 2855, 1578, 1450, 1413, 1344, 1202, 923, 780, 658  $\text{cm}^{-1}$ .

Compound **39b**:  $^1\text{H}$  NMR (400 MHz,  $\text{CDCl}_3$ )  $\delta$  3.02 – 2.91 (m, 2H), 1.92 – 1.82 (m, 4H), 1.82 – 1.70 (m, 6H), 1.70 – 1.58 (m, 4H), 1.44 – 1.25 (m, 6H);  $^{13}\text{C}$  NMR (101 MHz,  $\text{CDCl}_3$ )  $\delta$  164.09 (d), 154.53 (d), 154.00, 151.43, 39.12 (d), 30.43 (d), 26.01, 25.55. HRMS (ESI)  $m/z$  calculated for  $\text{C}_{16}\text{H}_{23}\text{N}_2\text{ClF}$  [(M+H) $^+$ ] 297.1528, found 297.1527. IR (film) 2931, 2852, 1589, 1453, 1405, 1362, 1308, 1254, 1008, 924  $\text{cm}^{-1}$ .

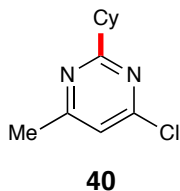

**4-Chloro-2-cyclohexyl-6-methylpyrimidine (40)**: According to the general procedure, 4-chloro-6-methylpyrimidine (64.3 mg, 0.50 mmol, 1.0 equiv.), 5.0 mL of MeCN,  $\text{H}_2\text{O}_2$  (0.1 mL, 1.0 mmol, 2.0 equiv.), HCl (86.0  $\mu\text{L}$ , 1.0 mmol, 2.0 equiv.), cyclohexane (1.10 mL, 10.0 mmol, 20.0 equiv.) were used. The reaction mixture was irradiated under 390 nm blue LEDs, after 24 hours, subjected to the workup procedure outlined in the general procedure and purified by flash chromatography (20% ethyl acetate/hexanes) to provide the title compound as a white solid (80.0 mg, 76% yield).  $^1\text{H}$  NMR (400 MHz,  $\text{CDCl}_3$ )  $\delta$  6.98 (s, 1H), 2.77 (tt,  $J = 11.9, 3.5$  Hz, 1H), 2.44 (s, 3H), 1.98 – 1.86 (m, 2H), 1.84 – 1.75 (m, 2H), 1.72 – 1.64 (m, 1H), 1.58 (qd,  $J = 12.4, 2.9$  Hz, 2H), 1.39 – 1.21 (m, 3H);  $^{13}\text{C}$

NMR (101 MHz, CDCl<sub>3</sub>)  $\delta$  175.22, 168.50, 160.87, 117.74, 47.23, 31.56, 26.00, 25.71, 23.86. Spectra data are consistent with those reported in the literature: *Org. Lett.* **2019**, *21*, DOI: acs.orglett.9b01635.

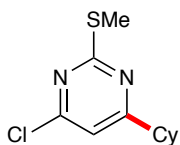

**41**

**4-Chloro-6-cyclohexyl-2-(methylthio)pyrimidine (41):** According to the general procedure, 4-chloro-2-(methylthio)pyrimidine (121.4 mg, 0.5 mmol, 1.0 equiv.), 5.0 mL of MeCN, H<sub>2</sub>O<sub>2</sub> (0.1 mL, 1.0 mmol, 2.0 equiv.), HCl (86.0  $\mu$ L, 1.0 mmol, 2.0 equiv.), cyclohexane (1.10 mL, 10.0 mmol, 20.0 equiv.) were used. The reaction mixture was irradiated under 390 nm blue LEDs, after 18 hours, subjected to the workup procedure outlined in the general procedure and purified by flash chromatography (10% ethyl acetate/hexanes) to provide the title compound as a colorless oil (104.4 mg, 86% yield). <sup>1</sup>H NMR (400 MHz, CDCl<sub>3</sub>)  $\delta$  6.81 (s, 1H), 2.58 (tt, *J* = 11.6, 3.3 Hz, 1H), 2.54 (s, 3H), 1.96 – 1.87 (m, 2H), 1.87 – 1.78 (m, 2H), 1.78 – 1.70 (m, 1H), 1.53 – 1.41 (m, 2H), 1.41 – 1.30 (m, 2H), 1.29 – 1.19 (m, 1H); <sup>13</sup>C NMR (101 MHz, cdcl<sub>3</sub>)  $\delta$  176.50, 172.82, 160.82, 113.48, 45.65, 31.67, 26.00, 25.72, 14.20; HRMS (ESI) *m/z* calculated for C<sub>11</sub>H<sub>16</sub>N<sub>2</sub>ClS [(M+H)<sup>+</sup>] 243.0717, found 243.0716. IR (film) 2928, 2853, 1552, 1449, 1371, 1323, 1275, 1230, 1131, 930, 826 cm<sup>-1</sup>.

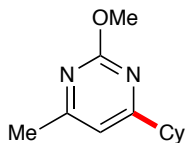

**42**

**4-Cyclohexyl-2-methoxy-6-methylpyrimidine (42):** According to the general procedure, 2-methoxy-4-methylpyrimidine (62.1 mg, 0.50 mmol, 1.0 equiv.), 5.0 mL of MeCN, H<sub>2</sub>O<sub>2</sub> (0.1 mL, 1.0 mmol, 2.0 equiv.), HCl (86.0 μL, 1.0 mmol, 2.0 equiv.), cyclohexane (1.10 ml, 10.0 mmol, 20.0 equiv.) were used. The reaction mixture was irradiated under 390 nm blue LEDs, after 18 hours, subjected to the workup procedure outlined in the general procedure and purified by flash chromatography (20% ethyl acetate/hexanes) to provide the title compound as a colorless oil (59.8 mg, 58% yield). <sup>1</sup>H NMR (400 MHz, CDCl<sub>3</sub>) δ 6.59 (s, 1H), 3.93 (s, 3H), 2.49 (tt, *J* = 11.8, 3.4 Hz, 1H), 2.36 (s, 3H), 1.90 – 1.82 (m, 2H), 1.82 – 1.74 (m, 2H), 1.72 – 1.64 (m, 1H), 1.46 (qd, *J* = 12.2, 2.5 Hz, 2H), 1.38 – 1.26 (m, 2H), 1.26 – 1.15 (m, 1H); <sup>13</sup>C NMR (101 MHz, CDCl<sub>3</sub>) δ 176.83, 169.10, 165.25, 111.42, 54.25, 45.56, 31.74, 26.10, 25.81, 23.87. Spectra data are consistent with those reported in the literature: *Org. Lett.* **2019**, *21*, DOI: [acs.orglett.9b01635](https://doi.org/10.1021/acs.orglett.9b01635).

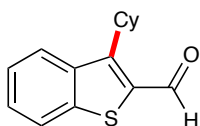

**43**

**3-Cyclohexylbenzo[*b*]thiophene-2-carbaldehyde (43):** According to the general procedure, benzo[*b*]thiophene-2-carbaldehyde (81.1 mg, 0.5mmol, 1.0 equiv.), 5.0 mL of MeCN, H<sub>2</sub>O<sub>2</sub> (0.1 mL, 1.0 mmol, 2.0 equiv.), HCl (86.0 μL, 1.0 mmol, 2.0 equiv.), cyclohexane (1.10 ml, 10.0 mmol, 20.0 equiv.) were used. The reaction mixture was irradiated under 390 nm blue LEDs, after 18 hours, subjected to the workup procedure outlined in the general procedure and purified by flash chromatography (10% ethyl acetate/hexanes) to provide the title compound as a light yellow oil (55.0 mg, 45% yield).

$^1\text{H}$  NMR (400 MHz,  $\text{CDCl}_3$ )  $\delta$  10.49 (s, 1H), 8.08 (d,  $J = 8.2$  Hz, 1H), 7.86 (d,  $J = 8.0$  Hz, 1H), 7.52 – 7.43 (m, 1H), 7.40 (ddd,  $J = 8.2, 7.0, 1.2$  Hz, 1H), 3.54 (p,  $J = 8.1$  Hz, 1H), 2.07 – 1.92 (m, 6H), 1.92 – 1.84 (m, 1H), 1.58 – 1.35 (m, 3H);  $^{13}\text{C}$  NMR (101 MHz,  $\text{CDCl}_3$ )  $\delta$  184.26, 152.08, 142.79, 138.92, 138.01, 127.77, 125.58, 124.31, 123.45, 39.43, 33.58, 27.03, 25.97; HRMS (EI)  $m/z$  calculated for  $\text{C}_{15}\text{H}_{16}\text{OS}$  [ $\text{M}^+$ ] 244.0922, found 244.0929; IR (film) 2922, 2852, 1684, 1655, 1613, 1518, 1201, 759, 726  $\text{cm}^{-1}$ .

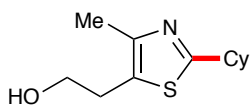

**44**

**2-(2-Cyclohexyl-4-methylthiazol-5-yl)ethanol (44):** According to the general procedure, 2-(4-methylthiazol-5-yl)ethanol (71.6 mg, 0.50 mmol, 1.0 equiv.), 5.0 mL of MeCN,  $\text{H}_2\text{O}_2$  (0.1 mL, 1.0 mmol, 2.0 equiv.), HCl (86.0  $\mu\text{L}$ , 1.0 mmol, 2.0 equiv.), cyclohexane (1.10 mL, 10.0 mmol, 20.0 equiv.) were used. The reaction mixture was irradiated under 390 nm blue LEDs, after 18 hours, subjected to the workup procedure outlined in the general procedure and purified by flash chromatography (50% ethyl acetate/hexanes) to provide the title compound as a light yellow oil (46.2 mg, 41% yield).  $^1\text{H}$  NMR (400 MHz,  $\text{CDCl}_3$ )  $\delta$  3.77 (t,  $J = 6.5$  Hz, 2H), 2.92 (t,  $J = 6.5$  Hz, 2H), 2.86 (tt,  $J = 11.5, 3.6$  Hz, 1H), 2.55 (br s, 1H), 2.29 (s, 3H), 2.09 – 2.03 (m, 2H), 1.84 – 1.76 (m, 2H), 1.72 – 1.67 (m, 1H), 1.49 – 1.29 (m, 4H), 1.28 – 1.19 (m, 1H);  $^{13}\text{C}$  NMR (101 MHz,  $\text{CDCl}_3$ )  $\delta$  173.82, 147.64, 125.80, 62.82, 42.55, 33.75, 29.79, 26.06, 25.71, 14.80. Spectra data are consistent with those reported in the literature: *Org. Lett.* **2019**, *21*, DOI: [acs.orglett.9b01635](https://doi.org/10.1021/acs.orglett.9b01635).

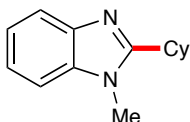

45

**2-Cyclohexyl-1-methyl-1H-benzo[d]imidazole (45):** According to the general procedure, 1-methyl-1H-benzo[d]imidazole (66.1 mg, 0.50 mmol, 1.0 equiv.), 5.0 mL of MeCN, H<sub>2</sub>O<sub>2</sub> (0.1 mL, 1.0 mmol, 2.0 equiv.), HCl (86.0 μL, 1.0 mmol, 2.0 equiv.), cyclohexane (1.10 ml, 10.0 mmol, 20.0 equiv.) were used. The reaction mixture was irradiated under 390 nm blue LEDs, after 18 hours, subjected to the workup procedure outlined in the general procedure and purified by flash chromatography (50% ethyl acetate/hexanes) to provide the title compound as a white solid (44.9 mg, 41% yield). <sup>1</sup>H NMR (400 MHz, CDCl<sub>3</sub>) δ 7.72 – 7.65 (m, 1H), 7.24 – 7.20 (m, 1H), 7.20 – 7.13 (m, 2H), 3.66 (s, 3H), 2.78 (tt, *J* = 11.8, 3.5 Hz, 1H), 1.98 – 1.89 (m, 2H), 1.89 – 1.81 (m, 2H), 1.80 – 1.68 (m, 3H), 1.43 – 1.26 (m, 3H); <sup>13</sup>C NMR (101 MHz, CDCl<sub>3</sub>) δ 158.80, 141.72, 135.25, 122.06, 121.90, 118.92, 108.87, 36.31, 31.23, 29.53, 26.24, 25.68. Spectra data are consistent with those reported in the literature: *Org. Lett.* **2017**, *19*, 6594-6597.

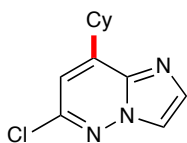

46

**6-Chloro-8-cyclohexylimidazo[1,2-*b*]pyridazine (46) :** According to the general procedure, 6-chloroimidazo[1,2-*b*]pyridazine (76.8 mg, 0.50 mmol, 1.0 equiv.), 5.0 mL of MeCN, H<sub>2</sub>O<sub>2</sub> (0.1 mL, 1.0 mmol, 2.0 equiv.), HCl (86.0 μL, 1.0 mmol, 2.0 equiv.), cyclohexane (1.10 ml, 10.0 mmol, 20.0 equiv.) were used. After 18 hours, the reaction

mixture was subjected to the workup procedure outlined in the general procedure and purified by flash chromatography (20% ethyl acetate/hexanes) to provide the title compounds as a white solid (69.5 mg, 59% yield).  $^1\text{H}$  NMR (400 MHz,  $\text{CDCl}_3$ )  $\delta$  7.87 (d,  $J = 1.2$  Hz, 1H), 7.70 (d,  $J = 1.3$  Hz, 1H), 6.84 (d,  $J = 0.8$  Hz, 1H), 3.34 (tt,  $J = 11.6, 3.9$  Hz, 1H), 2.12 – 2.01 (m, 2H), 1.93 – 1.83 (m, 2H), 1.83 – 1.76 (m, 1H), 1.58 – 1.43 (m, 4H), 1.36 – 1.25 (m, 1H);  $^{13}\text{C}$  NMR (101 MHz,  $\text{CDCl}_3$ )  $\delta$  148.04, 147.31, 137.87, 133.09, 117.16, 114.55, 38.70, 31.99, 26.20, 25.91. Spectra data are consistent with those reported in the literature: *Angew. Chem. Int. Ed.* **2017**, *56*, 12336-12339.

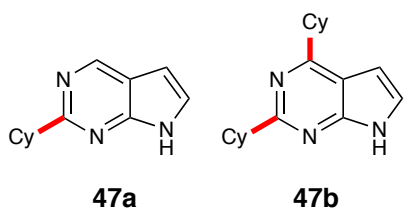

**4-cyclohexyl-7H-pyrrolo[2,3-*d*]pyrimidine (47a) and 2,4-dicyclohexyl-7H-pyrrolo[2,3-*d*]pyrimidine (47b):** According to the general procedure, 7H-pyrrolo[2,3-*d*]pyrimidine (59.5 mg, 0.5 mmol, 1.0 equiv.), 5.0 mL of MeCN,  $\text{H}_2\text{O}_2$  (0.1 mL, 1.0 mmol, 2.0 equiv.), HCl (86.0  $\mu\text{L}$ , 1.0 mmol, 2.0 equiv.), cyclohexane (1.10 mL, 10.0 mmol, 20.0 equiv.) were used. The reaction mixture was irradiated under 390 nm blue LEDs, after 18 hours, subjected to the workup procedure outlined in the general procedure and purified by flash chromatography (50% ethyl acetate/hexanes) to provide the title compounds as a white solid (44.3 mg, 44% yield for **47a**) and a white solid (24.1 mg, 17% yield for **47b**).

Compound **47a**:  $^1\text{H}$  NMR (400 MHz,  $\text{CDCl}_3$ )  $\delta$  12.07 (s, 1H), 8.86 (s, 1H), 7.35 (d,  $J = 3.6$  Hz, 1H), 6.64 (d,  $J = 3.6$  Hz, 1H), 3.11 (tt,  $J = 11.8, 3.5$  Hz, 1H), 2.06 – 1.94 (m, 2H), 1.94 – 1.87 (m, 2H), 1.87 – 1.70 (m, 3H), 1.54 – 1.30 (m, 3H);  $^{13}\text{C}$  NMR (101 MHz,

CDCl<sub>3</sub>)  $\delta$  167.23, 151.62, 150.77, 124.79, 116.48, 99.73, 44.30, 31.57, 26.42, 25.98;  
HRMS (ESI)  $m/z$  calculated for C<sub>12</sub>H<sub>16</sub>N<sub>3</sub> [(M+H)<sup>+</sup>] 202.1339, found 202.1337. IR (film)  
3132, 2925, 2852, 1588, 1505, 1425, 1348, 1254, 1110, 899, 733 cm<sup>-1</sup>.

Compound **47b**: <sup>1</sup>H NMR (400 MHz, CDCl<sub>3</sub>)  $\delta$  11.41 (s, 1H), 7.24 (dd,  $J$  = 3.6, 2.0 Hz, 1H), 6.61 (dd,  $J$  = 3.6, 1.6 Hz, 1H), 3.15 – 2.87 (m, 2H), 2.16 – 2.05 (m, 2H), 1.98 – 1.68 (m, 12H), 1.56 – 1.33 (m, 6H); <sup>13</sup>C NMR (101 MHz, CDCl<sub>3</sub>)  $\delta$  167.12, 167.05, 152.59, 123.60, 113.88, 99.85, 47.50, 45.20, 32.58, 31.59, 26.45 (2C), 26.23, 26.09; HRMS (ESI)  $m/z$  calculated for C<sub>18</sub>H<sub>26</sub>N<sub>3</sub> [(M+H)<sup>+</sup>] 284.2121, found 284.2119. IR (film) 3116, 2928, 2850, 1604, 1574, 1501, 1450, 1396, 1295, 1254, 1114, 896 cm<sup>-1</sup>.

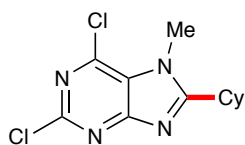

**48**

**2,6-Dichloro-8-cyclohexyl-7-methyl-7H-purine (48)**: According to the general procedure, 2,6-dichloro-7-methyl-7H-purine (101.5 mg, 0.50 mmol, 1.0 equiv.), 5.0 mL of MeCN, H<sub>2</sub>O<sub>2</sub> (0.1 mL, 1.0 mmol, 2.0 equiv.), HCl (86.0  $\mu$ L, 1.0 mmol, 2.0 equiv.), cyclohexane (1.10 ml, 10.0 mmol, 20.0 equiv.) were used. The reaction mixture was irradiated under 390 nm blue LEDs, after 18 hours, subjected to the workup procedure outlined in the general procedure and purified by flash chromatography (50% ethyl acetate/hexanes) to provide the title compound as a white solid (122.6 mg, 86% yield). <sup>1</sup>H NMR (400 MHz, CDCl<sub>3</sub>)  $\delta$  4.05 (s, 3H), 2.88 (tt,  $J$  = 11.6, 3.4 Hz, 1H), 1.96 – 1.86 (m, 4H), 1.83 – 1.72 (m, 3H), 1.46 – 1.30 (m, 3H); <sup>13</sup>C NMR (101 MHz, CDCl<sub>3</sub>)  $\delta$  167.54, 162.81, 152.30, 142.01, 122.68, 36.45, 32.06, 30.76, 25.74, 25.39. Spectra data are

consistent with those reported in the literature: *Org. Lett.* **2019**, *21*, DOI:

acs.orglett.9b01635.

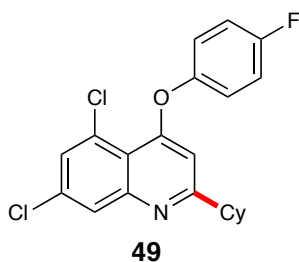

**5,7-Dichloro-2-cyclohexyl-4-(4-fluorophenoxy)quinoline (49):** According to the general procedure, 5,7-dichloro-4-(4-fluorophenoxy)quinoline (154.1 mg, 0.50 mmol, 1.0 equiv.), 5.0 mL of MeCN, H<sub>2</sub>O<sub>2</sub> (0.1 mL, 1.0 mmol, 2.0 equiv.), HCl (86.0  $\mu$ L, 1.0 mmol, 2.0 equiv.), cyclohexane (1.10 mL, 10.0 mmol, 20.0 equiv.) were used. After 24 hours, the reaction mixture was subjected to the workup procedure outlined in the general procedure and purified by flash chromatography (10% ethyl acetate/hexanes) to provide the title compound as a colorless oil (136.7 mg, 70% yield). <sup>1</sup>H NMR (400 MHz, CDCl<sub>3</sub>)  $\delta$  7.93 (d, *J* = 2.1 Hz, 1H), 7.45 (d, *J* = 2.1 Hz, 1H), 7.18 – 7.04 (m, 4H), 6.53 (s, 1H), 2.68 (tt, *J* = 11.7, 3.4 Hz, 1H), 1.94 – 1.84 (m, 2H), 1.84 – 1.76 (m, 2H), 1.75 – 1.67 (m, 1H), 1.50 – 1.30 (m, 4H), 1.29 – 1.18 (m, 1H); <sup>13</sup>C NMR (101 MHz, CDCl<sub>3</sub>)  $\delta$  169.42, 162.18, 159.73 (d), 151.29, 150.25 (d), 134.59, 129.77, 128.44, 127.41, 121.84 (d), 116.90 (d), 116.88, 105.66, 47.12, 32.24, 26.21, 25.77. Spectra data are consistent with those reported in the literature: *Asian J. Org. Chem.* **2018**, *7*, 1307-1310.

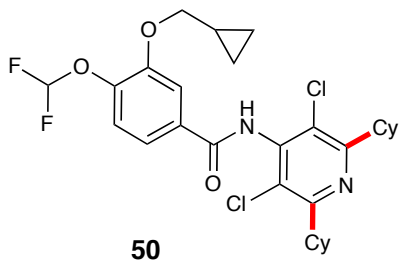



**3-(Cyclopropylmethoxy)-*N*-(3,5-dichloro-2,6-dicyclohexylpyridin-4-yl)-4-**

**(difluoromethoxy)benzamide (50):** According to the general procedure, 3-(cyclopropylmethoxy)-*N*-(3,5-dichloropyridin-4-yl)-4-(difluoromethoxy)benzamide (201.6 mg, 0.50 mmol, 1.0 equiv.), 5.0 mL of MeCN, H<sub>2</sub>O<sub>2</sub> (0.1 mL, 1.0 mmol, 2.0 equiv.), HCl (86.0  $\mu$ L, 1.0 mmol, 2.0 equiv.), cyclohexane (1.10 ml, 10.0 mmol, 20.0 equiv.) were used. After 18 hours, the reaction mixture was subjected to the workup procedure outlined in the general procedure and purified by flash chromatography (20% ethyl acetate/hexanes) to provide the title compound as a white solid (136.1 mg, 48% yield). <sup>1</sup>H NMR (400 MHz, CDCl<sub>3</sub>)  $\delta$  7.89 (s, 1H), 7.57 (d, *J* = 2.1 Hz, 1H), 7.45 (dd, *J* = 8.2, 2.0 Hz, 1H), 7.21 (d, *J* = 8.2 Hz, 1H), 6.72 (t, *J* = 75.0 Hz, 1H), 3.91 (d, *J* = 6.9 Hz, 2H), 3.12 (tt, *J* = 11.3, 3.3 Hz, 2H), 1.89 – 1.71 (m, 10H), 1.70 – 1.57 (m, 4H), 1.47 – 1.25 (m, 7H), 0.72 – 0.59 (m, 2H), 0.40 – 0.29 (m, 2H); <sup>13</sup>C NMR (101 MHz, cdcl<sub>3</sub>)  $\delta$  164.17, 160.57, 150.67, 143.45, 138.65, 131.35, 124.57, 122.11, 119.81, 115.67 (t), 114.07, 74.01, 42.31, 31.20, 26.34, 25.97, 9.93, 3.19; HRMS (ESI) *m/z* calculated for C<sub>29</sub>H<sub>35</sub>O<sub>3</sub>N<sub>2</sub>Cl<sub>2</sub>F<sub>2</sub> [(*M*+*H*)<sup>+</sup>] 567.1987, found 567.1987. IR (film) 3245, 2929, 2853, 1660, 1605, 1591, 1548, 1493, 1291, 1200, 1139, 1061 cm<sup>-1</sup>.

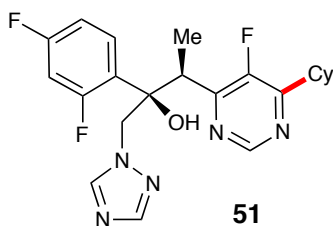

**(2R,3S)-3-(6-cyclohexyl-5-fluoropyrimidin-4-yl)-2-(2,4-difluorophenyl)-1-(1H-1,2,4-**

**triazol-1-yl)butan-2-ol (51):** According to the general procedure, (2R,3S)-2-(2,4-difluorophenyl)-3-(5-fluoropyrimidin-4-yl)-1-(1H-1,2,4-triazol-1-yl)butan-2-ol (174.7 mg, 0.50 mmol, 1.0 equiv.), 5.0 mL of MeCN, H<sub>2</sub>O<sub>2</sub> (0.1 mL, 1.0 mmol, 2.0 equiv.), HCl

(86.0  $\mu$ L, 1.0 mmol, 2.0 equiv.), cyclohexane (1.10 ml, 10.0 mmol, 20.0 equiv.) were used. The reaction mixture was irradiated under 390 nm blue LEDs, after 18 hours, subjected to the workup procedure outlined in the general procedure and purified by flash chromatography (50% ethyl acetate/hexanes) to provide the title compound as a white solid (146.3 mg, 57% yield).  $^1\text{H}$  NMR (400 MHz,  $\text{CDCl}_3$ )  $\delta$  8.80 (d,  $J = 1.8$  Hz, 1H), 7.99 (s, 1H), 7.65 – 7.54 (m, 1H), 7.52 (s, 1H), 6.86 – 6.78 (m, 2H), 6.76 (br s, 1H), 4.70 (d,  $J = 14.2$  Hz, 1H), 4.28 (d,  $J = 14.1$  Hz, 1H), 4.10 (q,  $J = 6.9$  Hz, 1H), 3.15 – 3.02 (m, 1H), 1.93 – 1.77 (m, 5H), 1.72 – 1.60 (m, 2H), 1.49 – 1.29 (m, 3H), 1.07 (d,  $J = 7.1$  Hz, 3H);  $^{13}\text{C}$  NMR (101 MHz,  $\text{CDCl}_3$ )  $\delta$  164.00, 163.88, 163.03, 162.89, 161.51, 161.39, 159.77, 159.66, 157.80, 157.65, 157.32, 157.20, 154.62, 152.75, 152.65, 152.00, 150.68, 143.92, 130.68, 130.63, 130.59, 130.53, 123.64, 123.61, 123.53, 123.49, 111.62, 111.59, 111.42, 111.39, 104.29, 104.03, 104.01, 103.76, 77.32, 77.00, 76.68, 57.54, 57.50, 39.07, 36.31, 36.25, 30.69, 30.47, 26.04, 26.01, 25.64, 16.20; HRMS (ESI)  $m/z$  calculated for  $\text{C}_{22}\text{H}_{25}\text{ON}_5\text{F}_3$  [(M+H) $^+$ ] 432.2006, found 432.1997. IR (film) 3312, 2934, 2855, 1618, 1593, 1501, 1451, 1410, 1272, 1136, 966, 850, 738  $\text{cm}^{-1}$ .

# V. NMR Spectra

2011746-iz-6-2A-1H

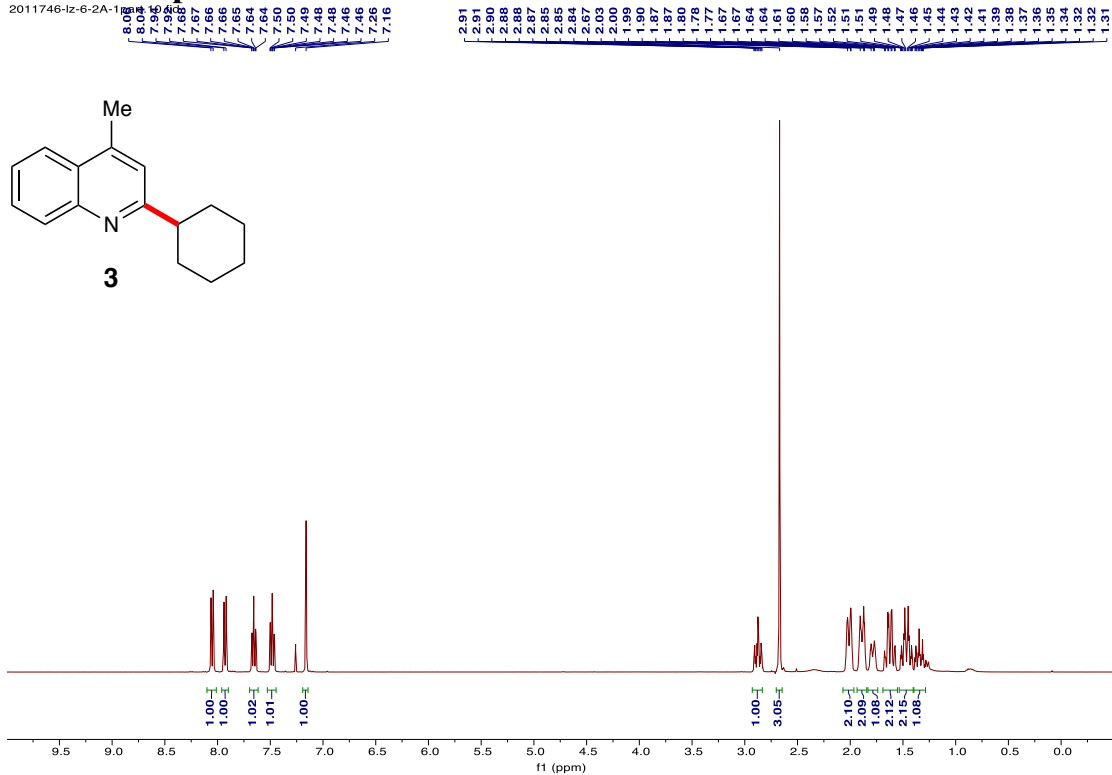

iz-6-2a-2ipath

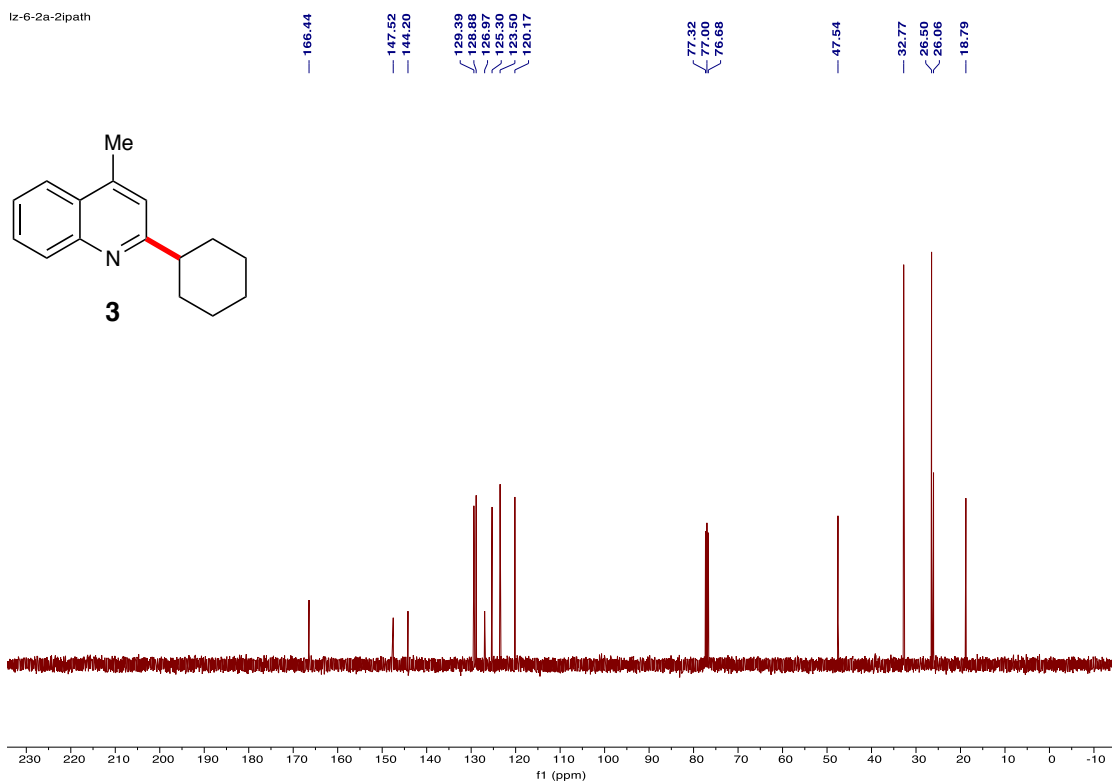

2011746-lz-6-13b

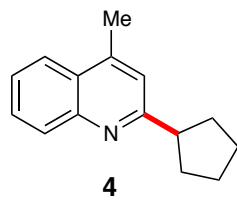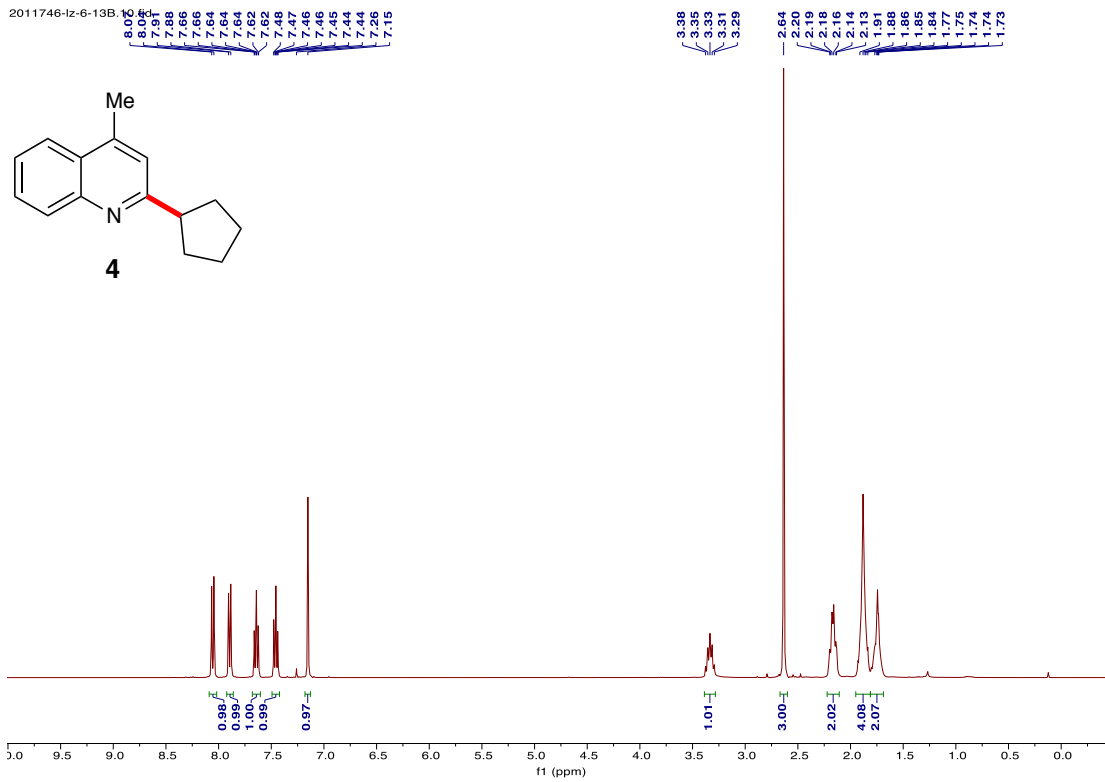

lz-6-13b

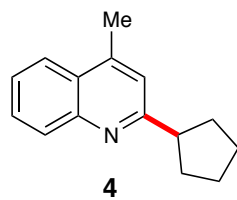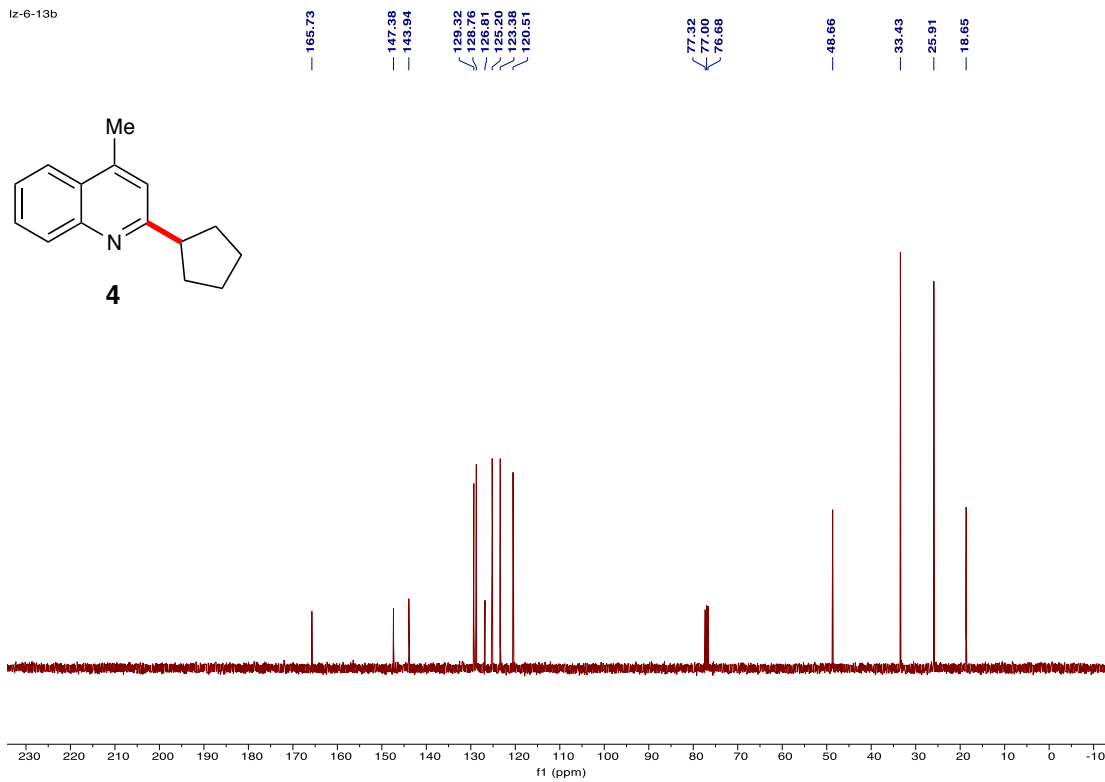

2011746-lz-6-13D

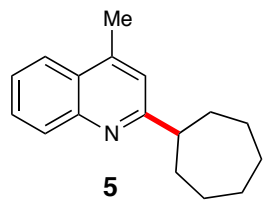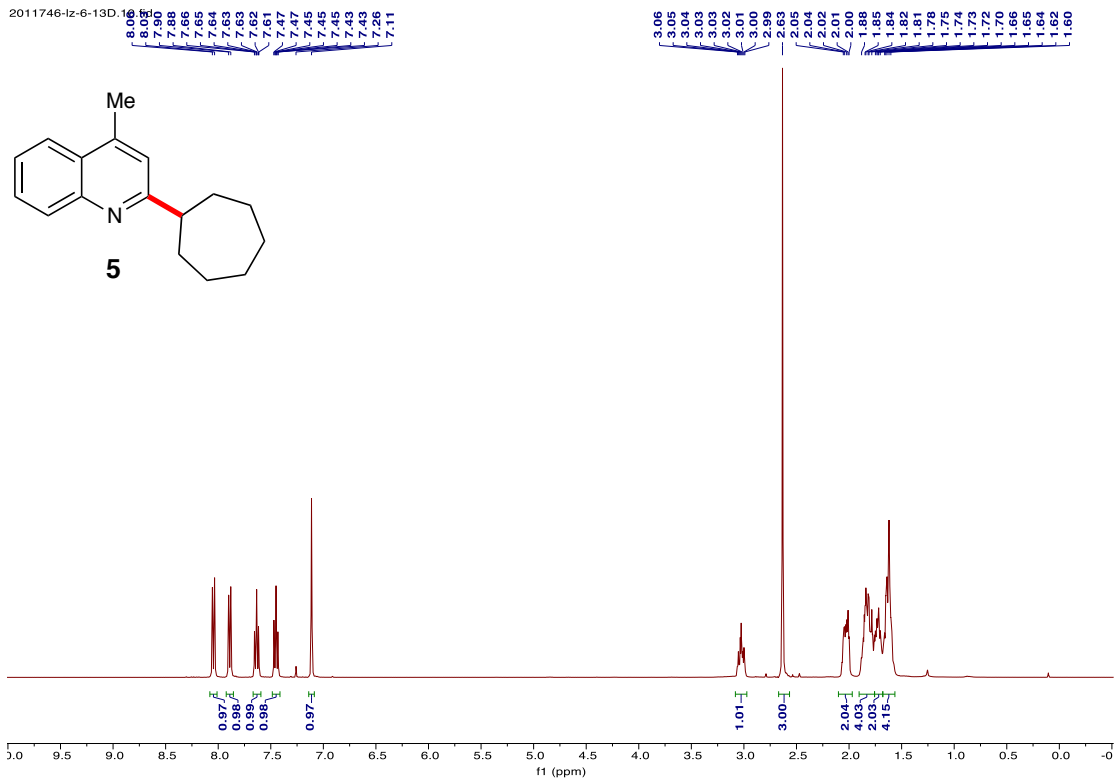

lz-6-13D

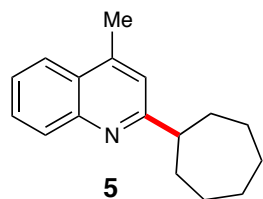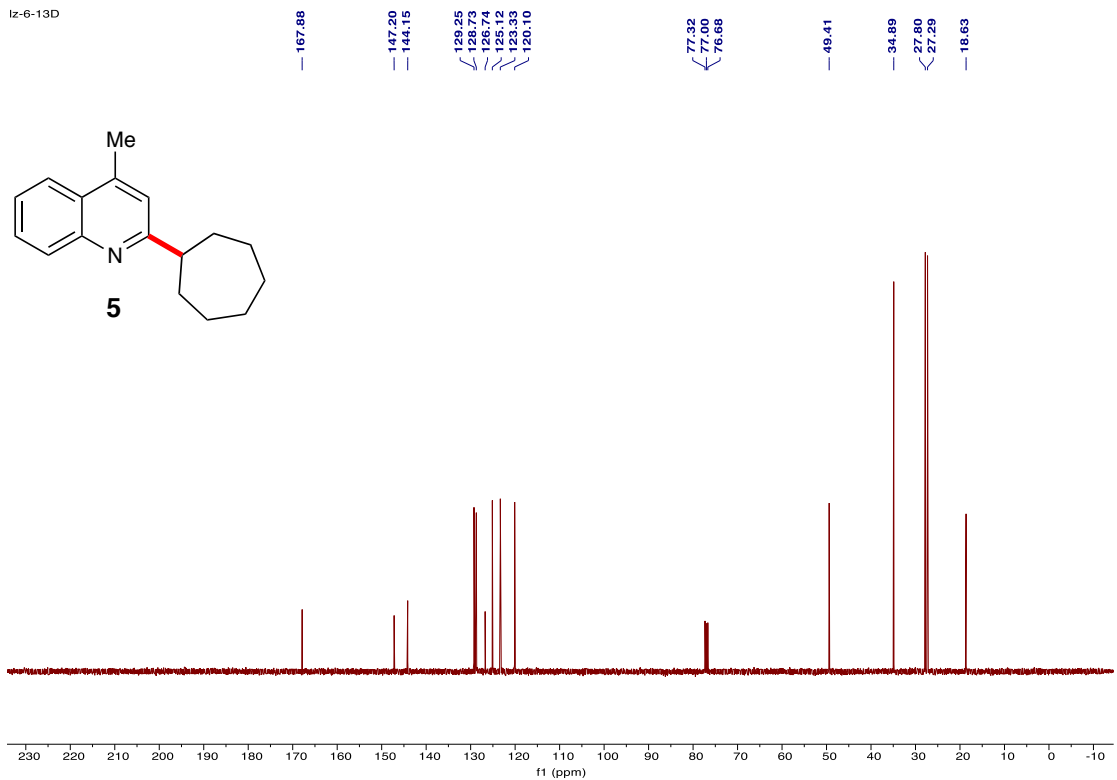

2011746-lz-6-12H.

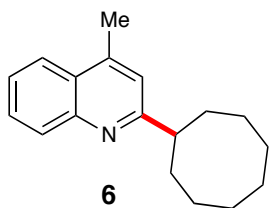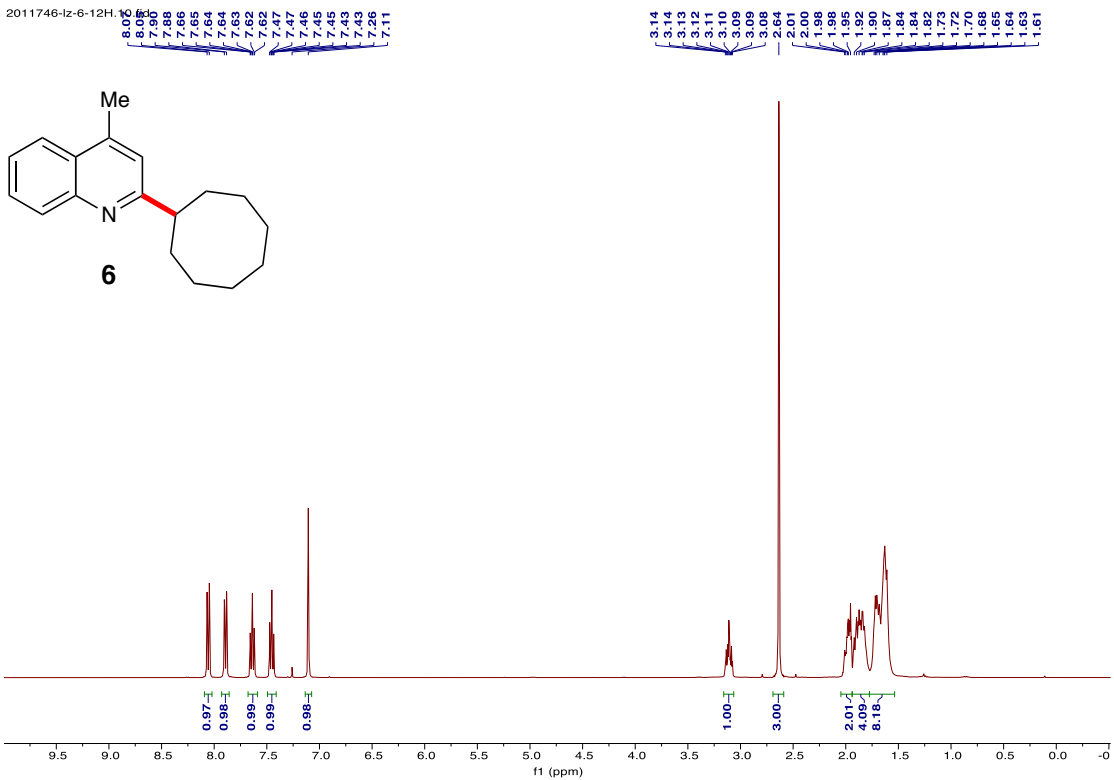

lz-6-12H

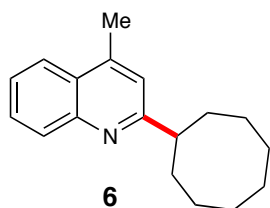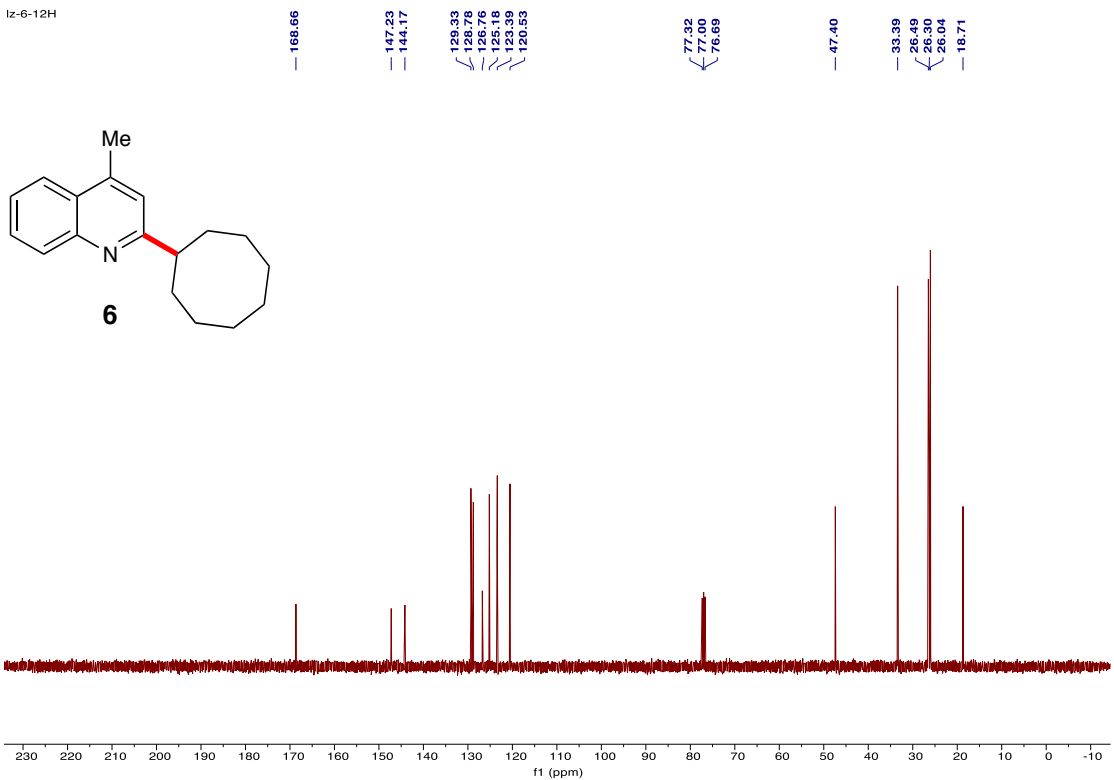

2011746-lz-6-7A-1part.10

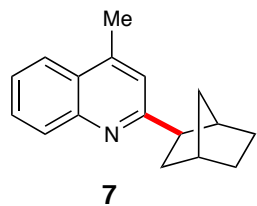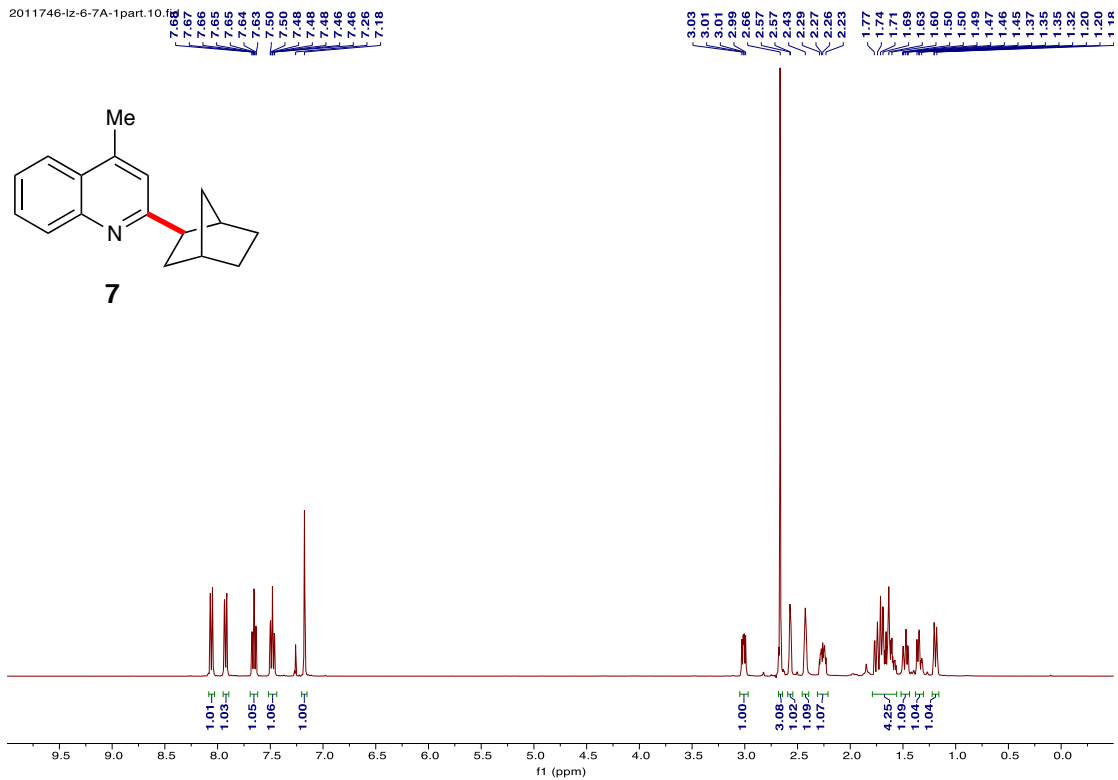

lz-6-7A-1part

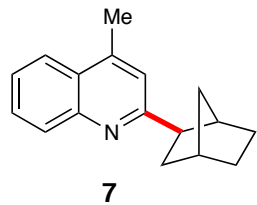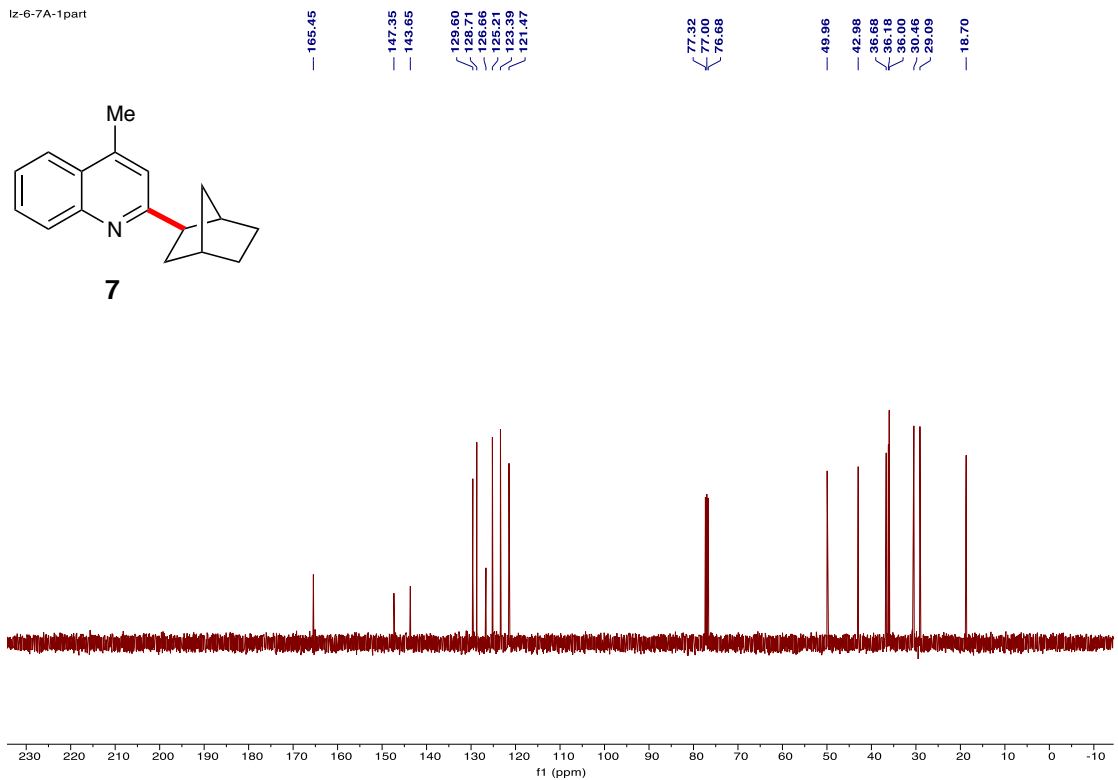

2011746-lzl6-2M

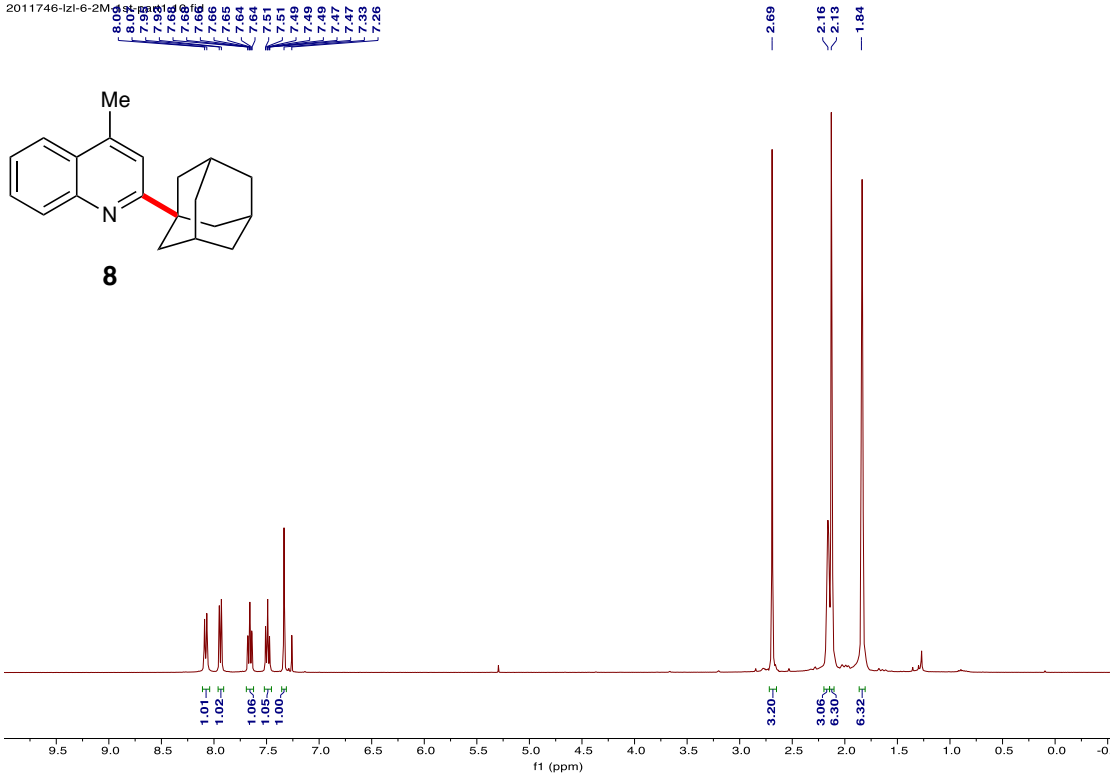

lzl6-2m-1st

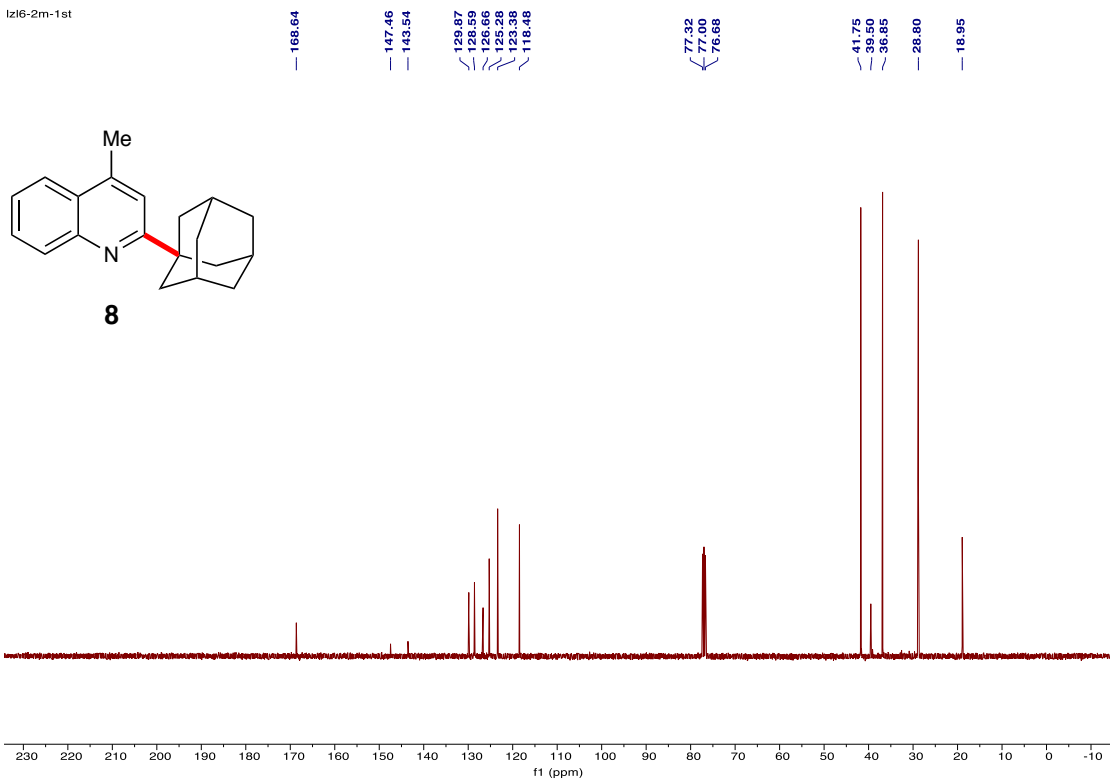



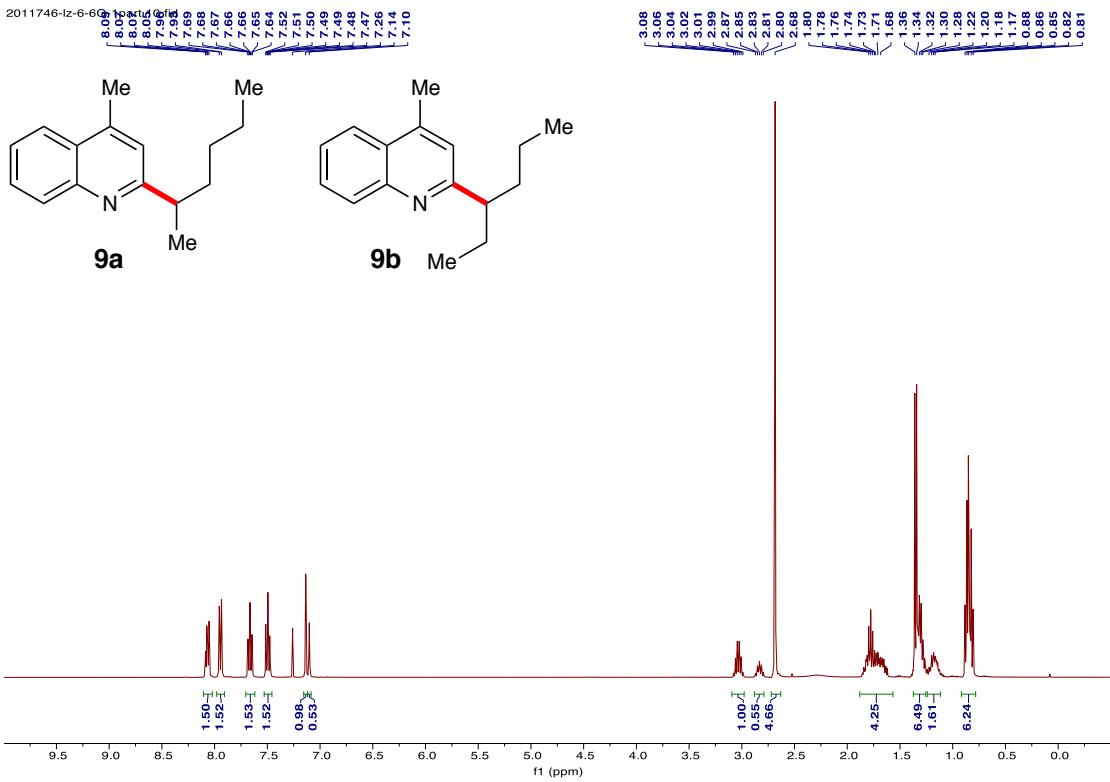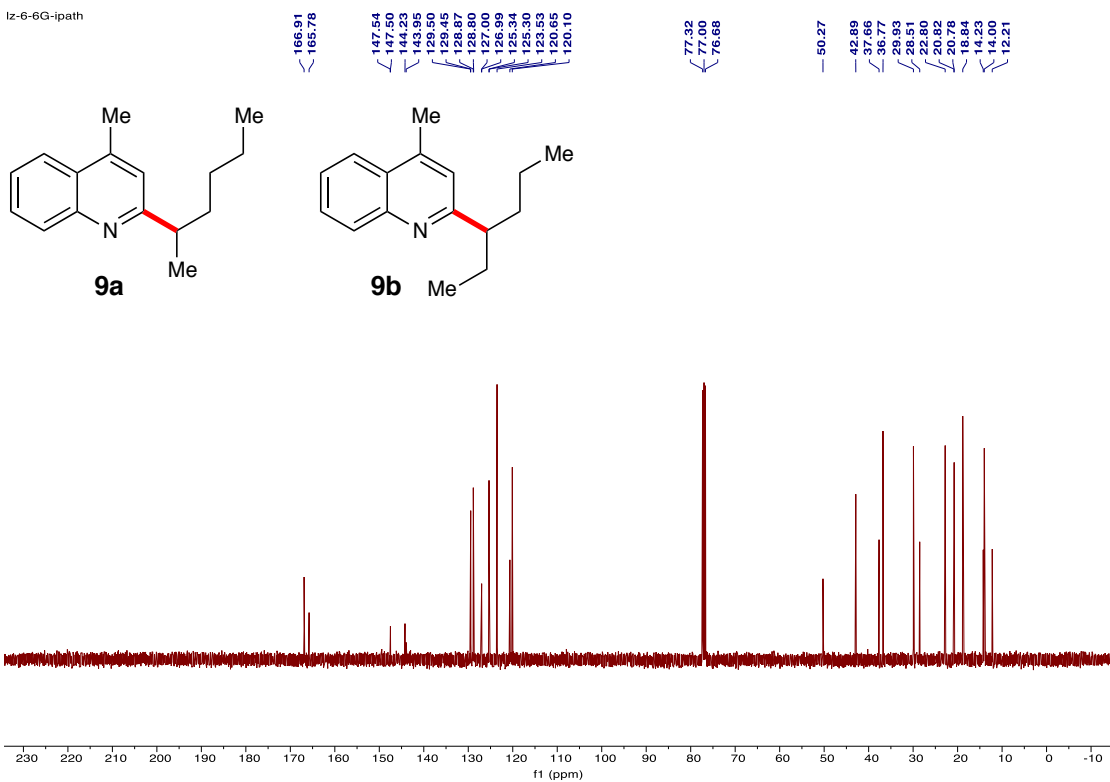

2011746-1z1-6-15B-1st.10.fid

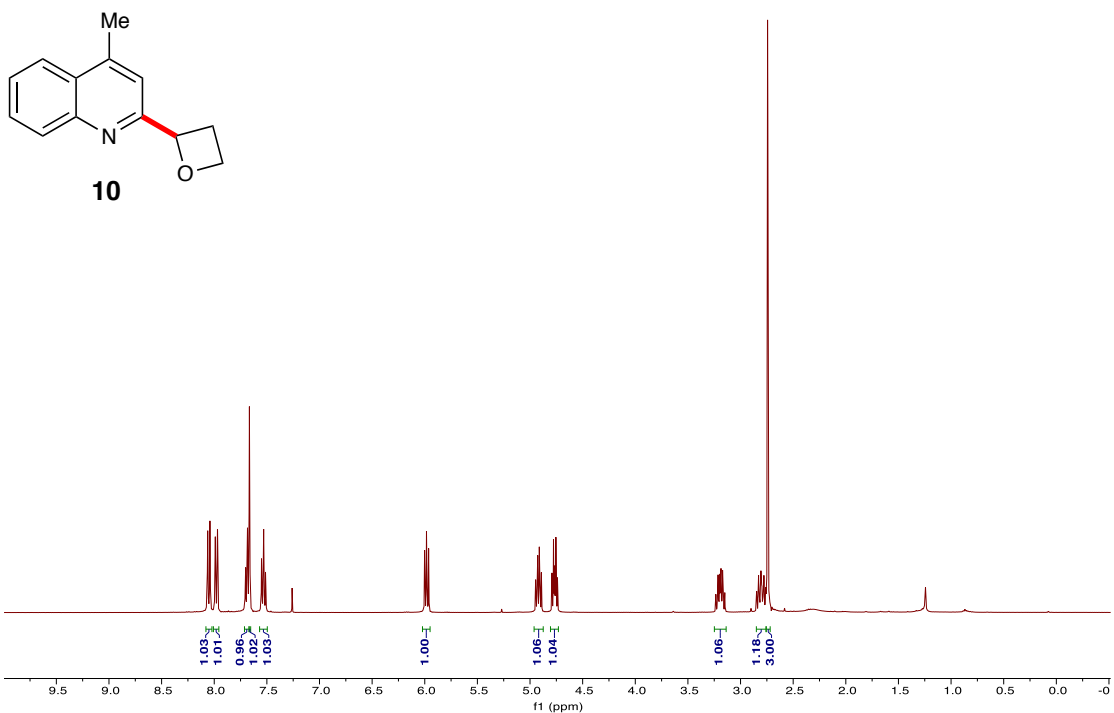

zh6-15B

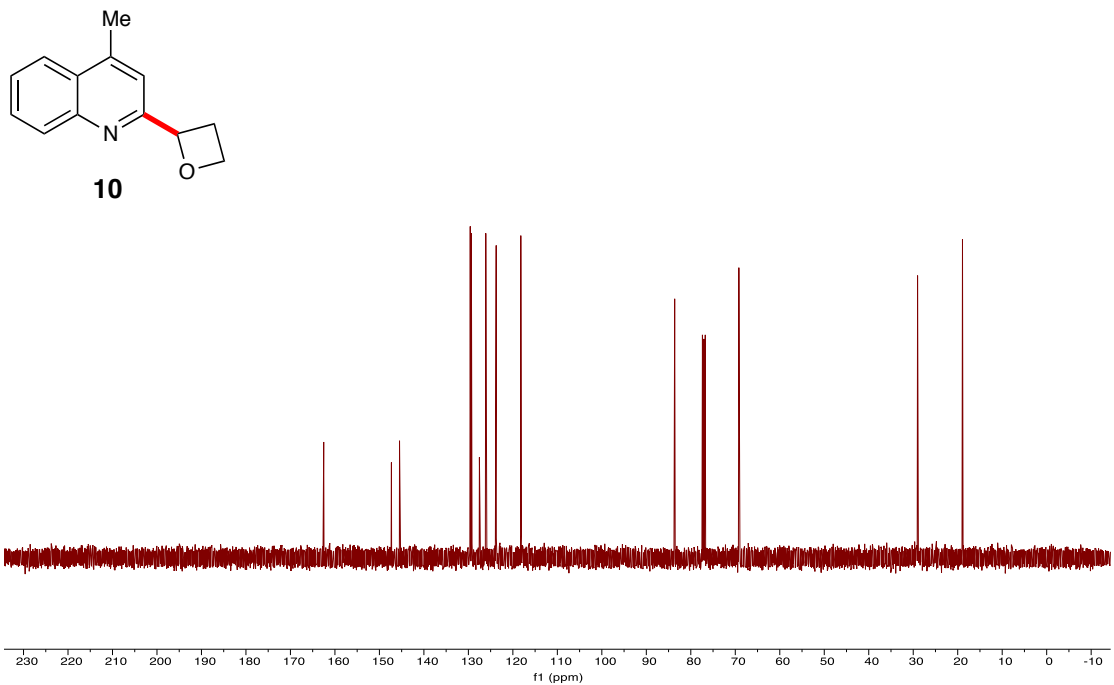

2011746-lz-6-6E-1

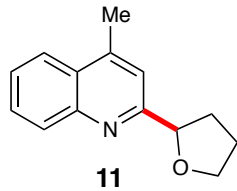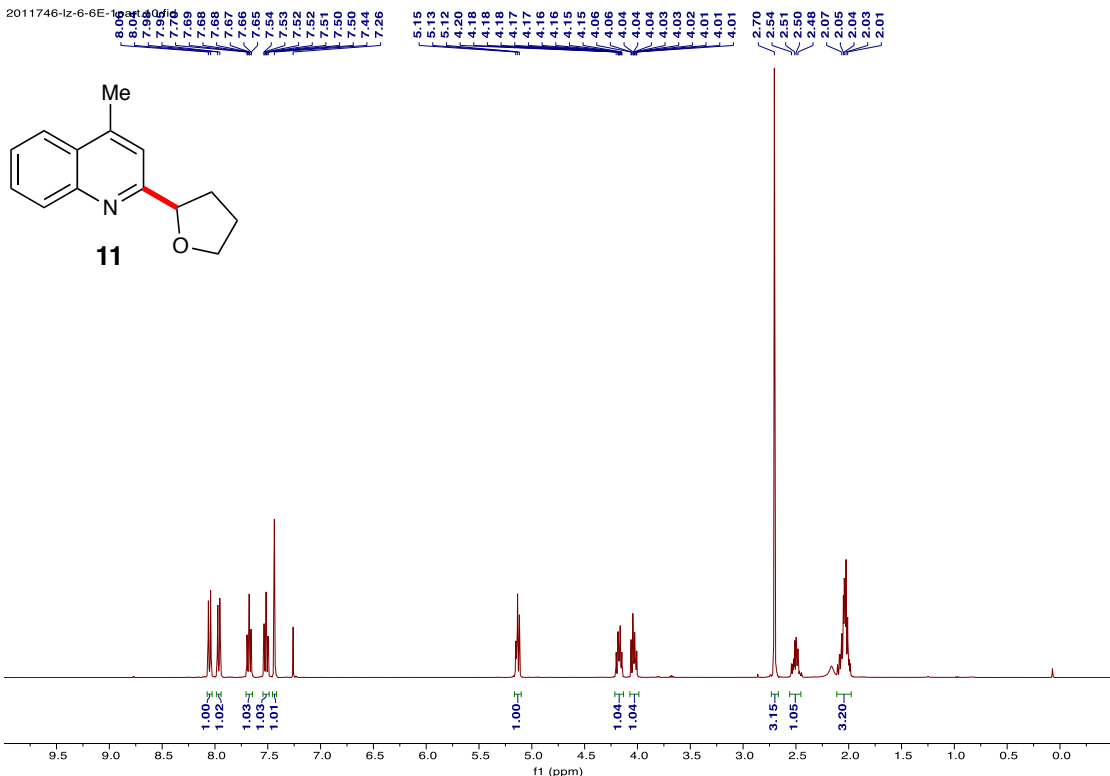

lz-6-6E-1part

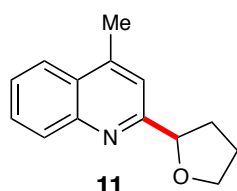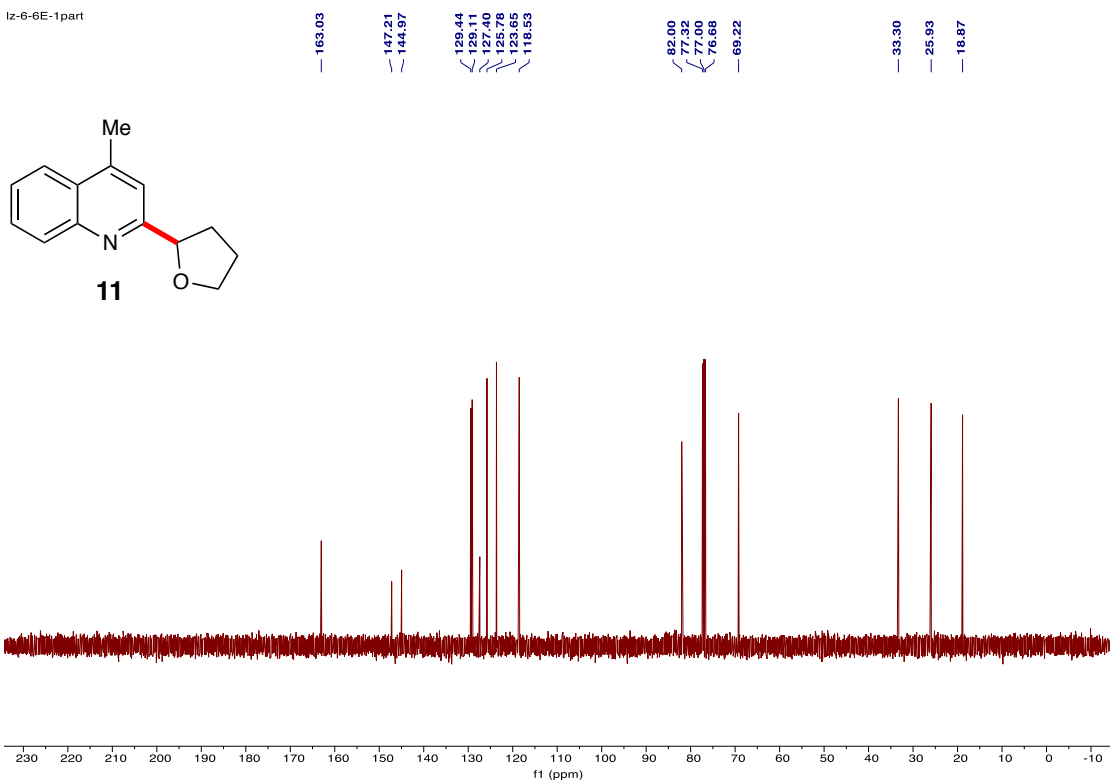

2011746-lz-6-12M

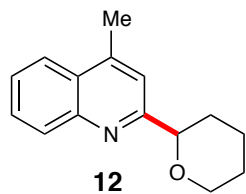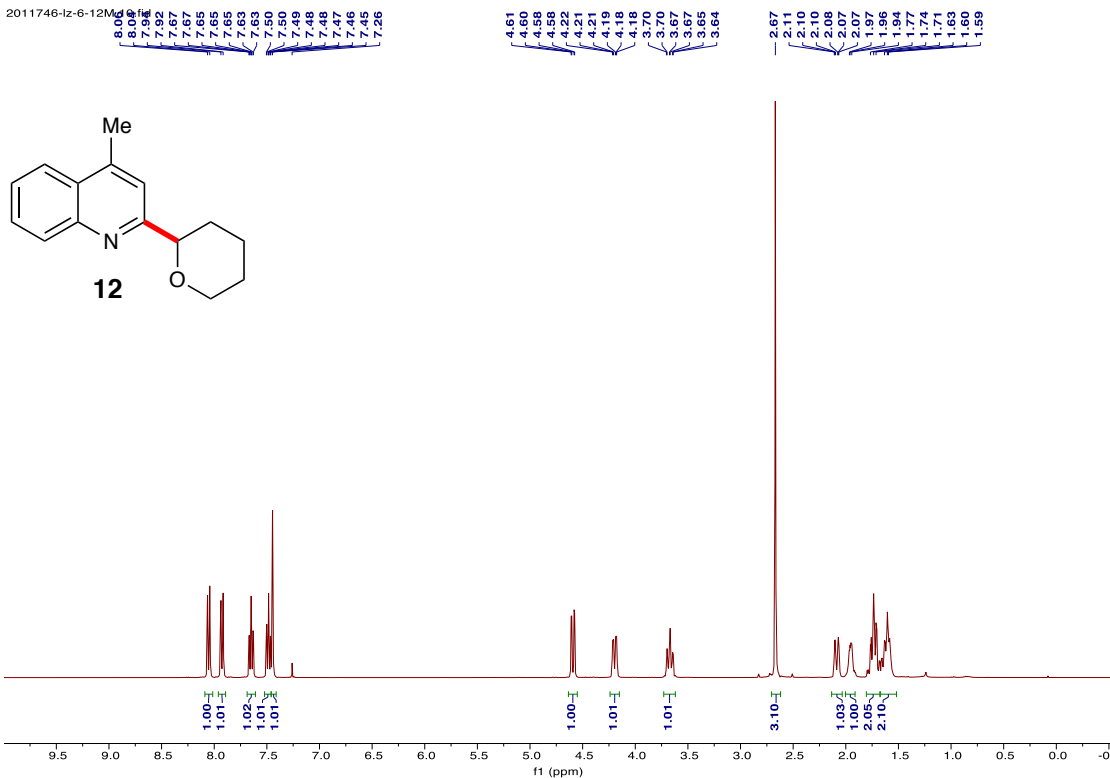

lz-6-12M

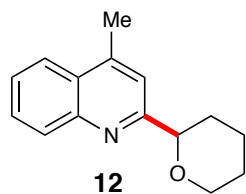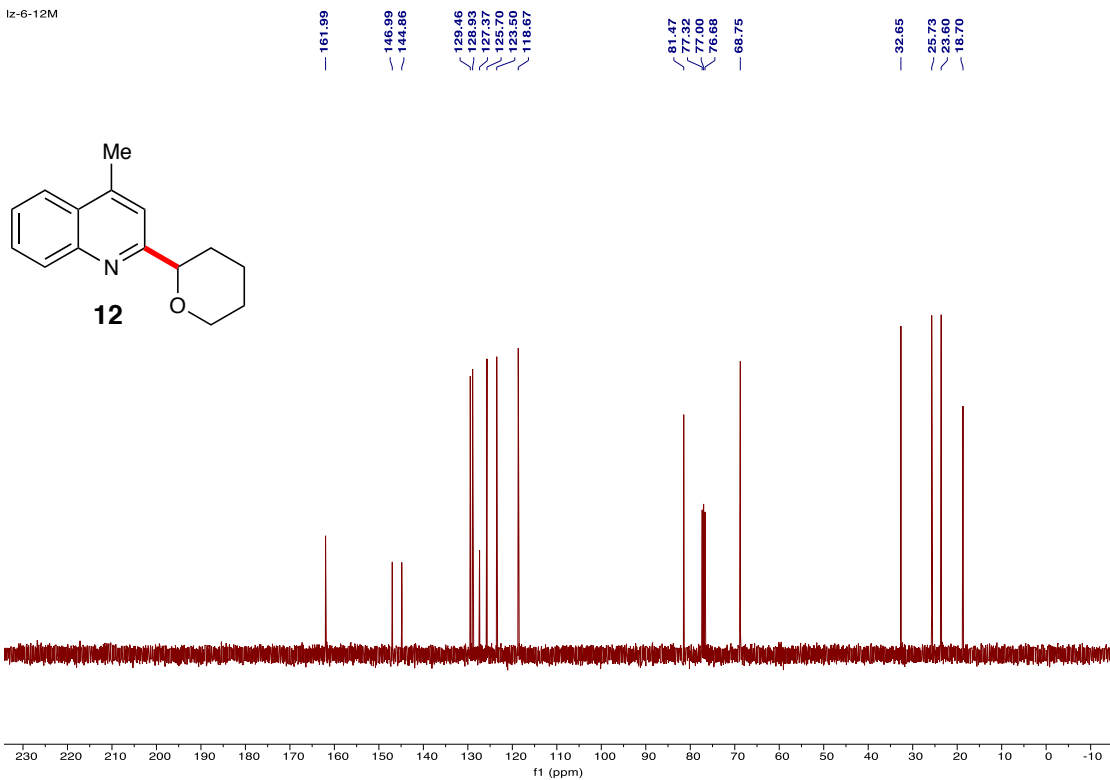

2011746-zh-10-85D

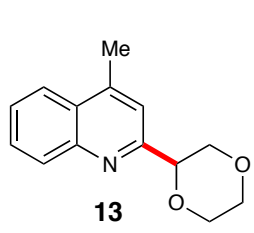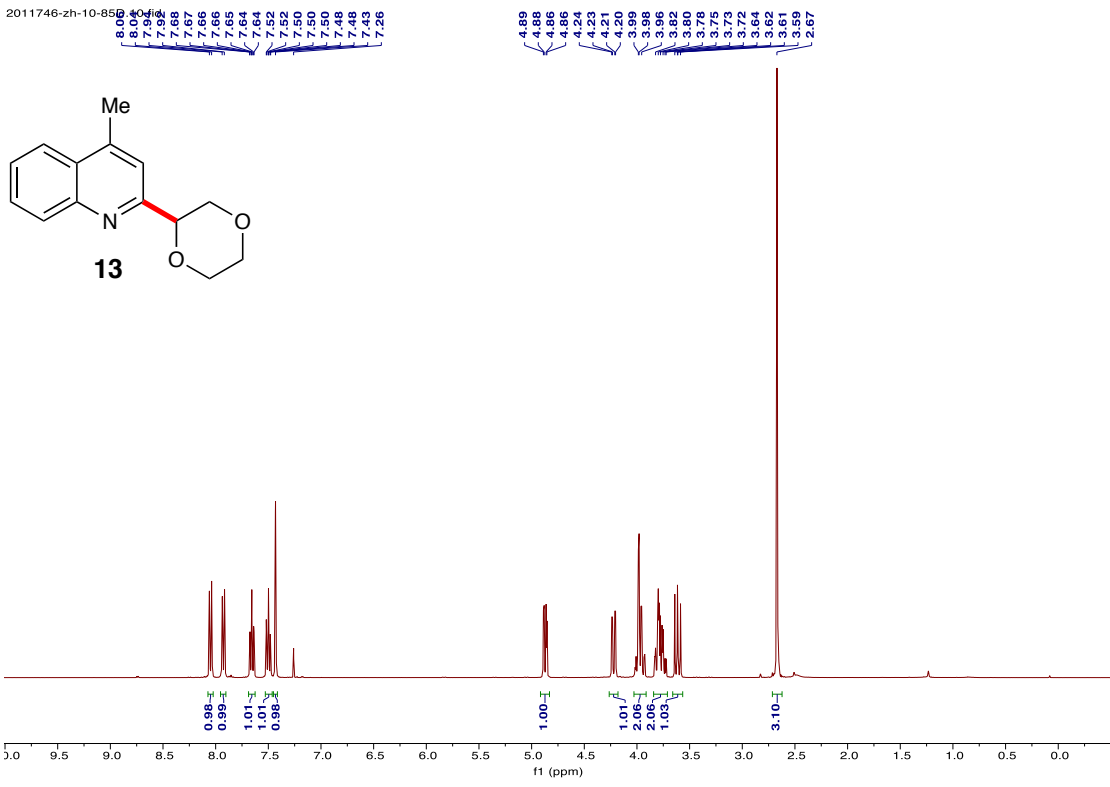

zh10-85D

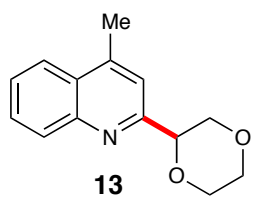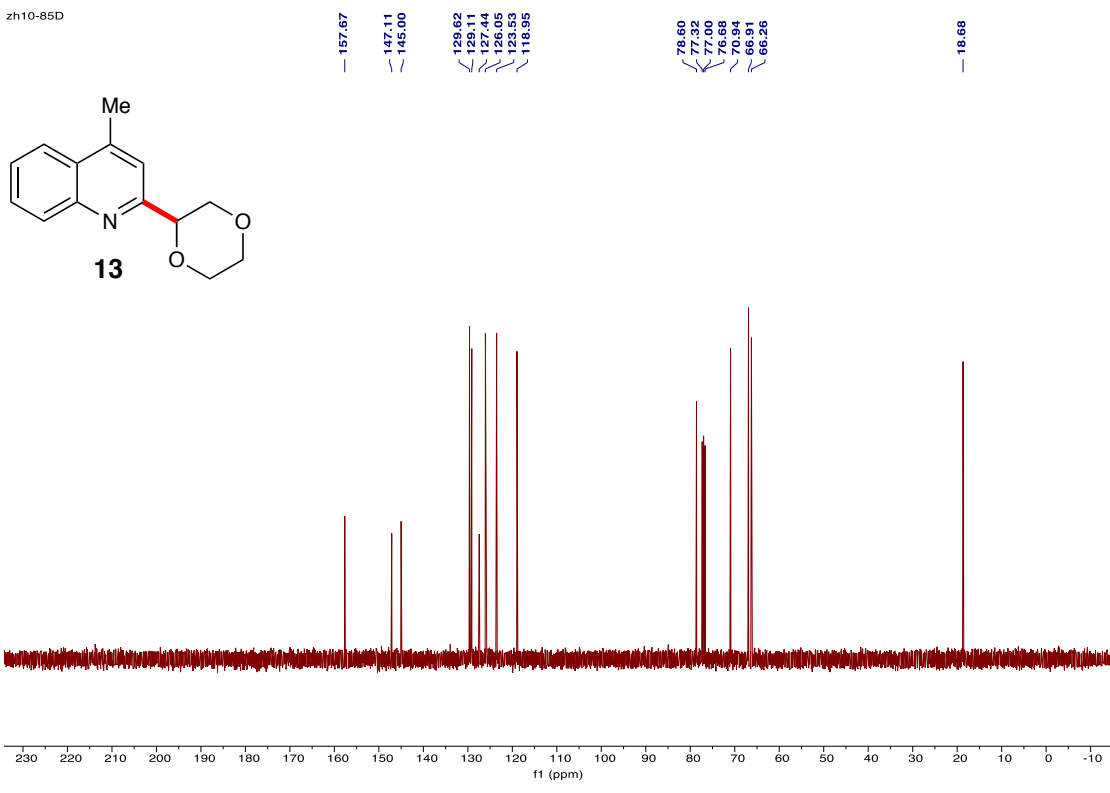

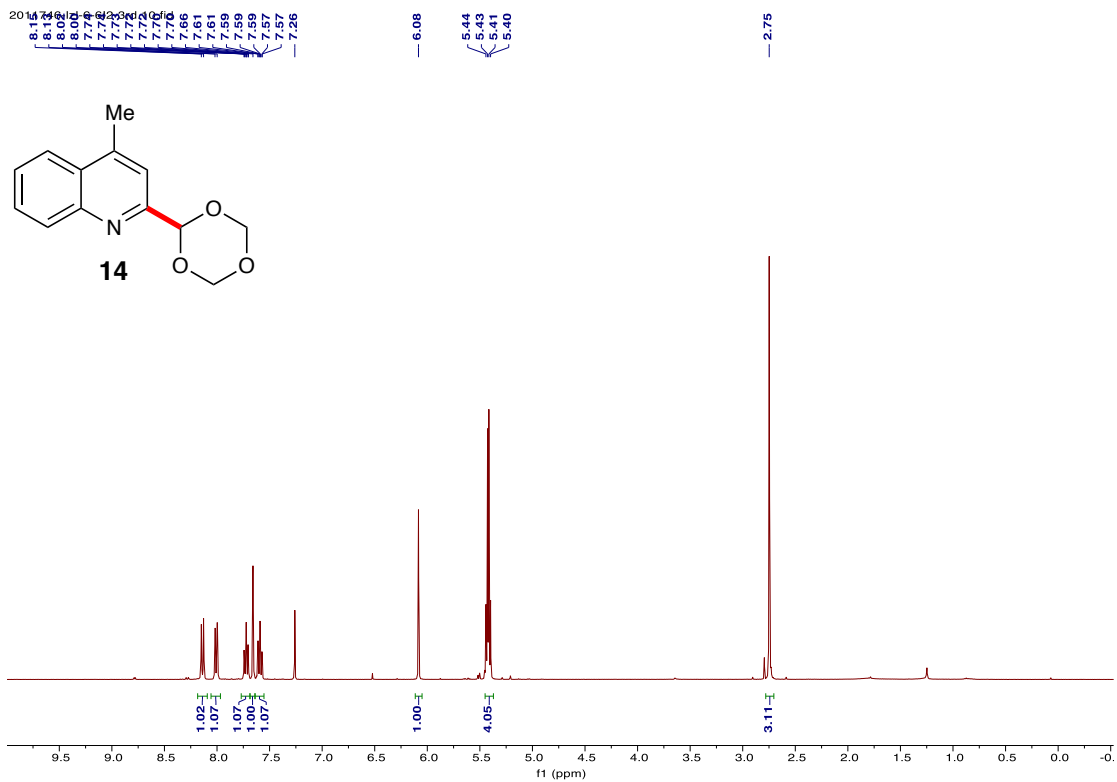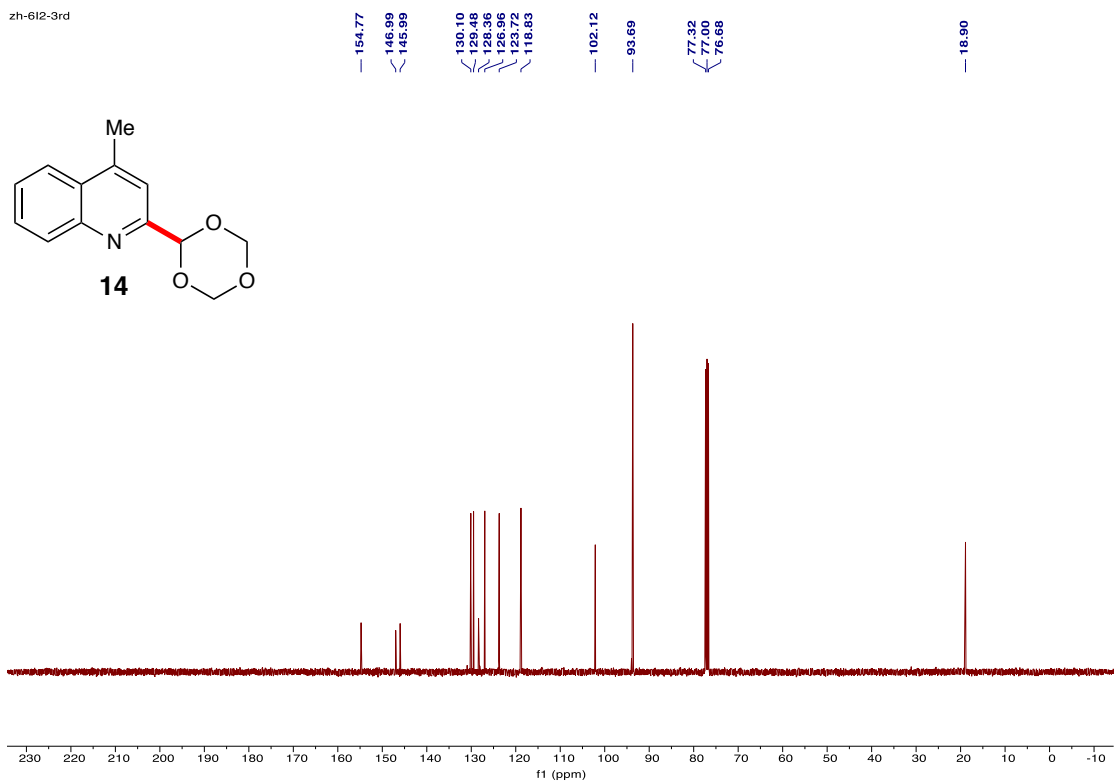

20111746-lz-6-6F-1part

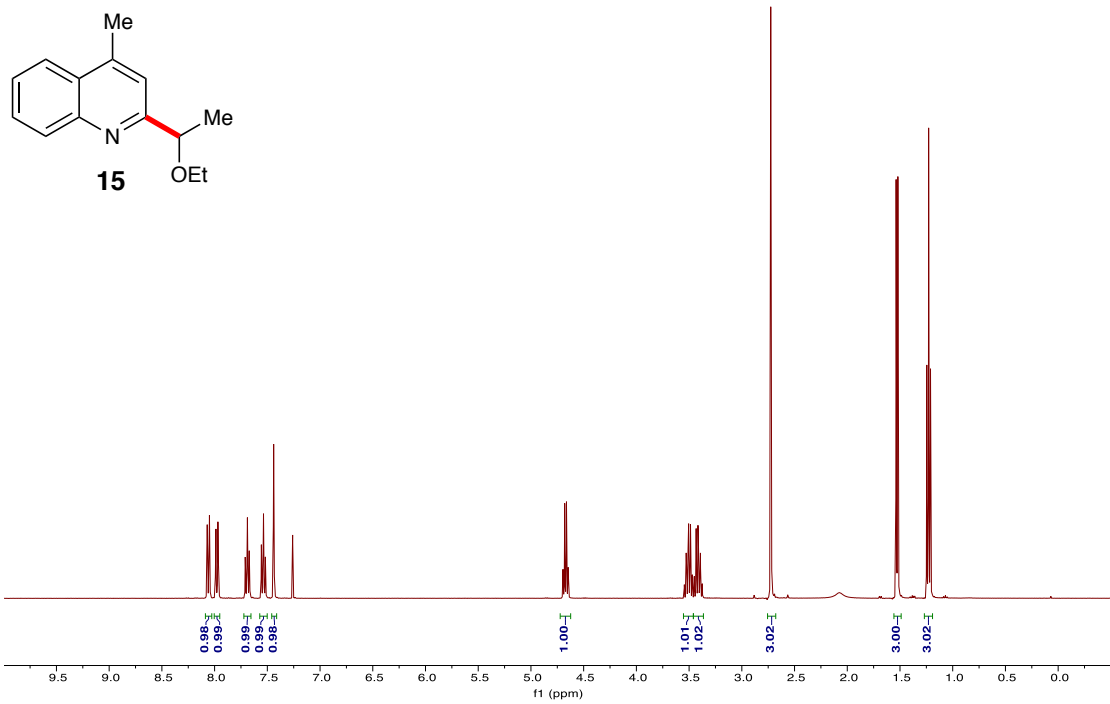

lz-6-6F-1part

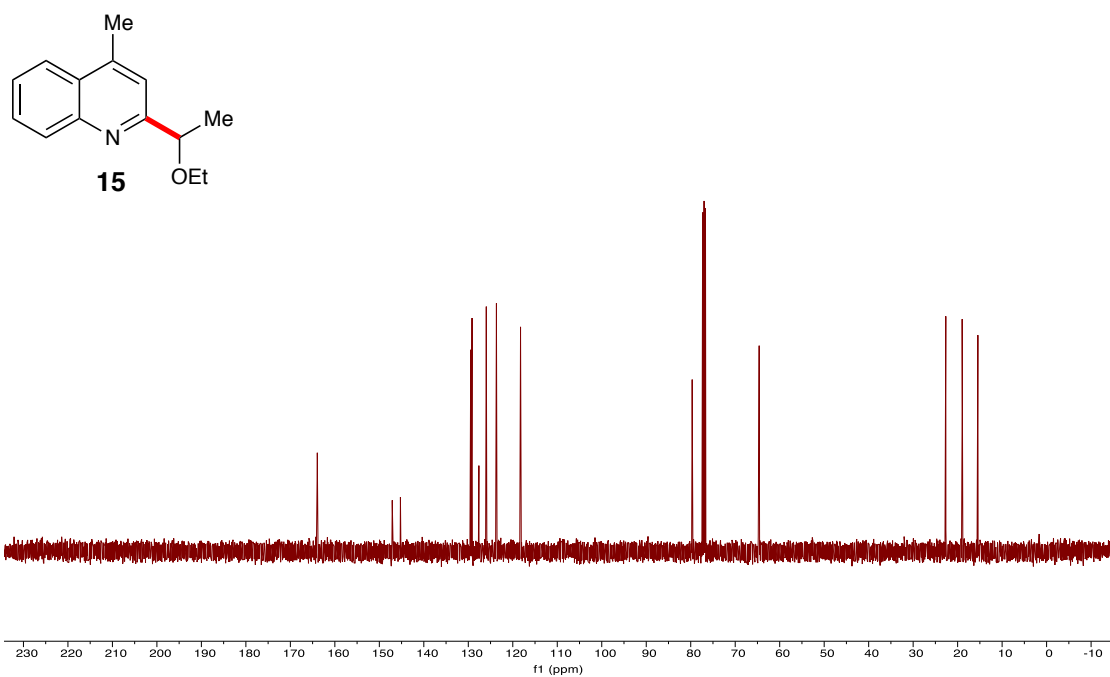

2011746-zh-10-87A

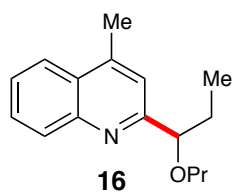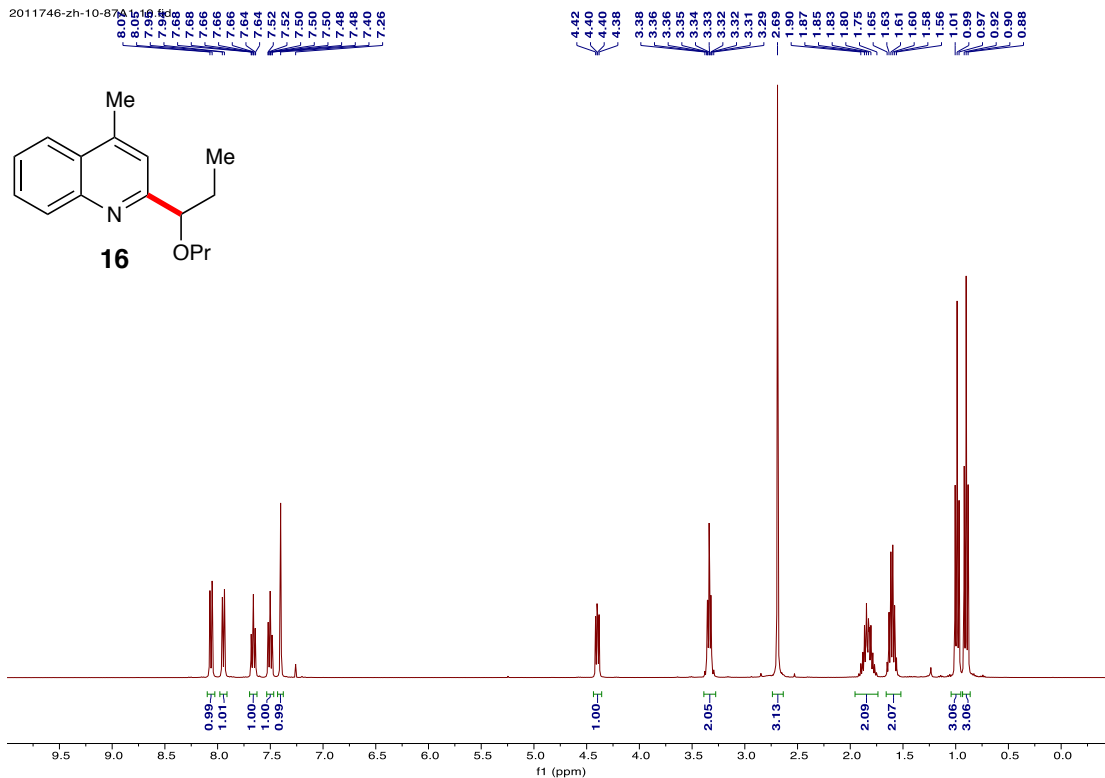

zh10-87A1

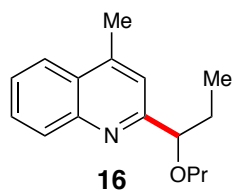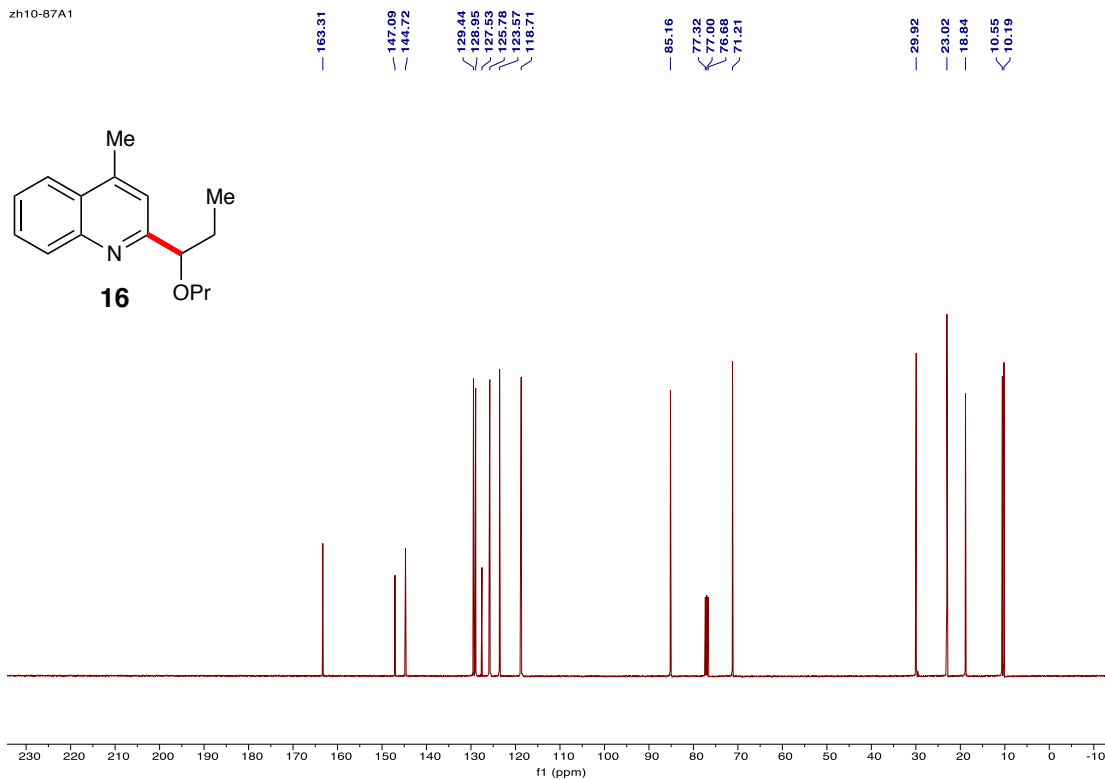



2011746-zh-11-0

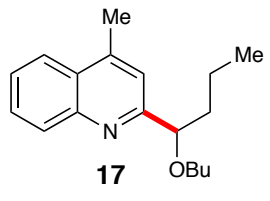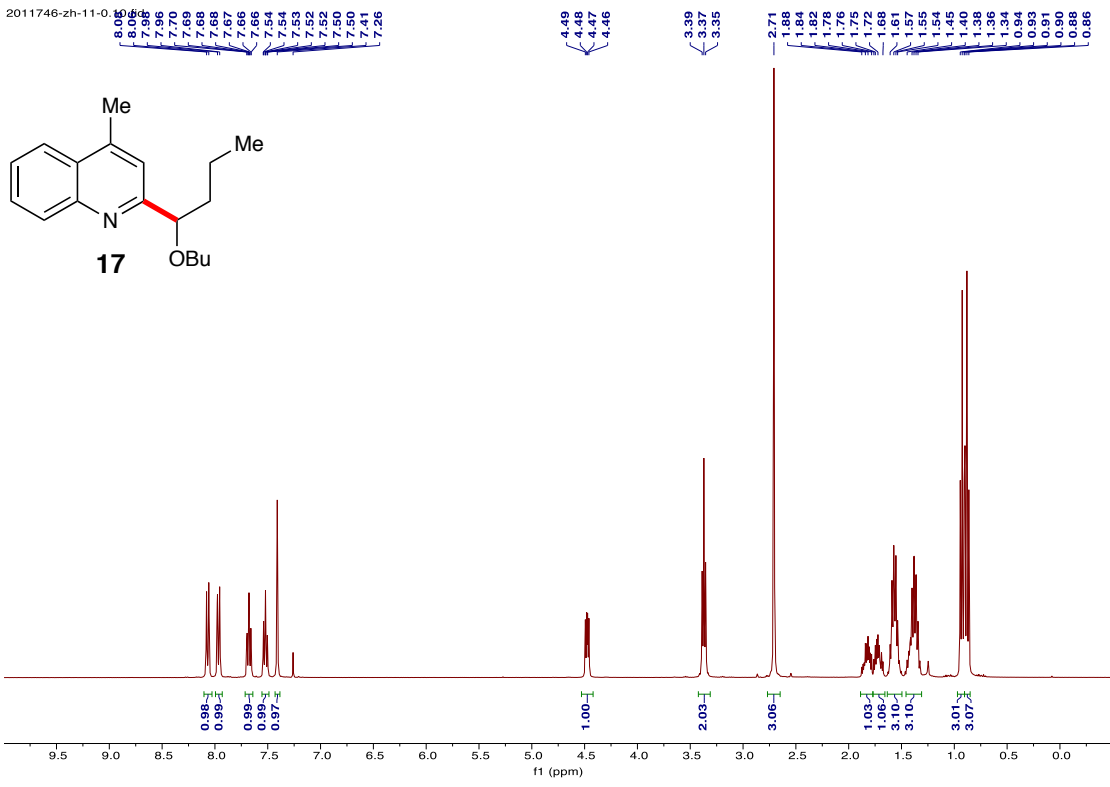

zh-11-0

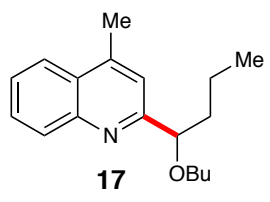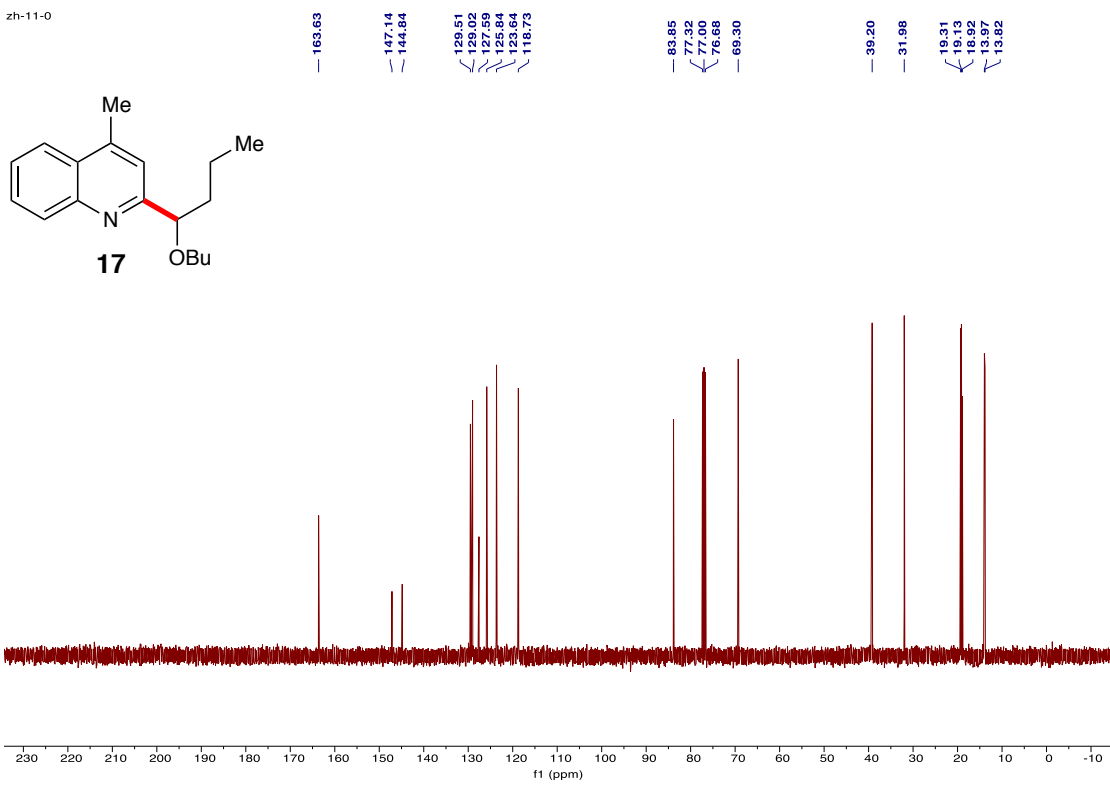

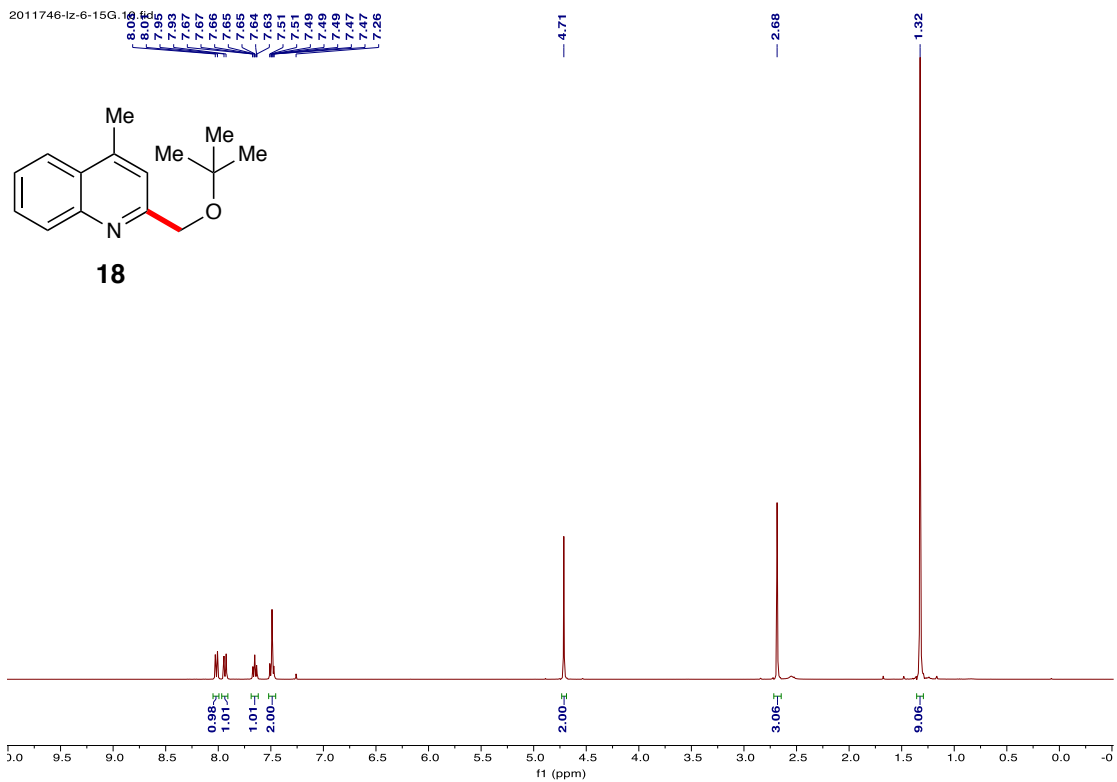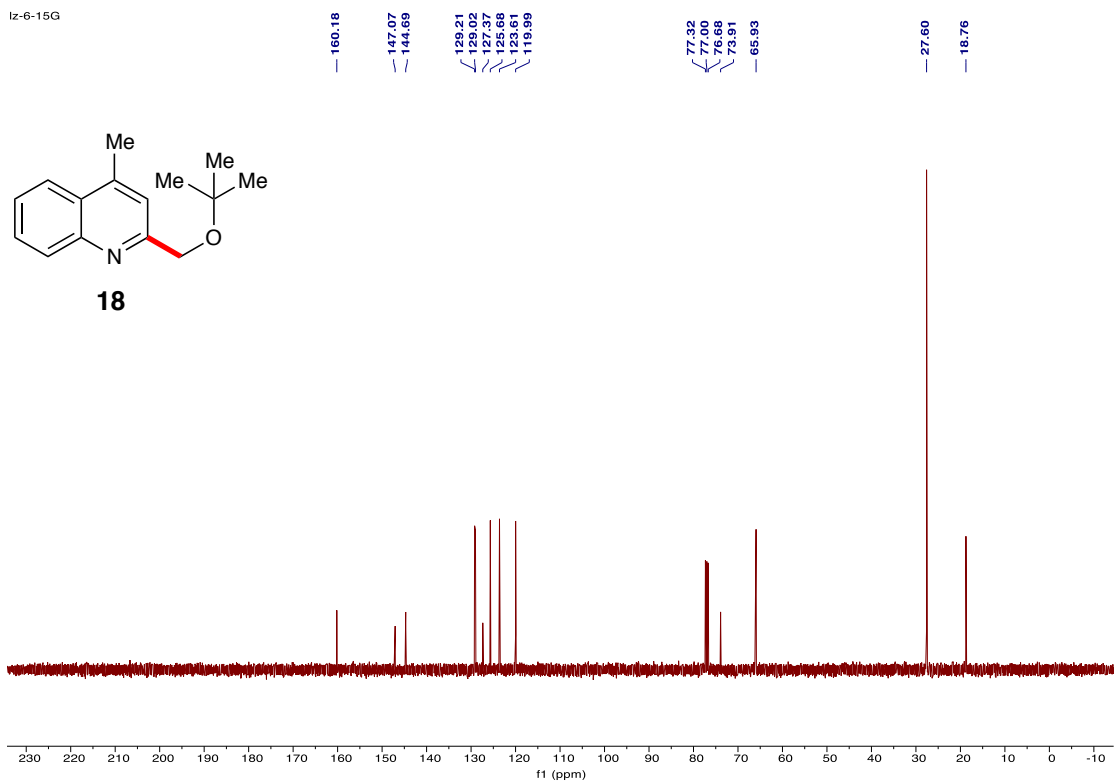

2011746-lz-6-6A-1part

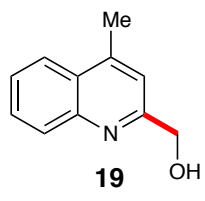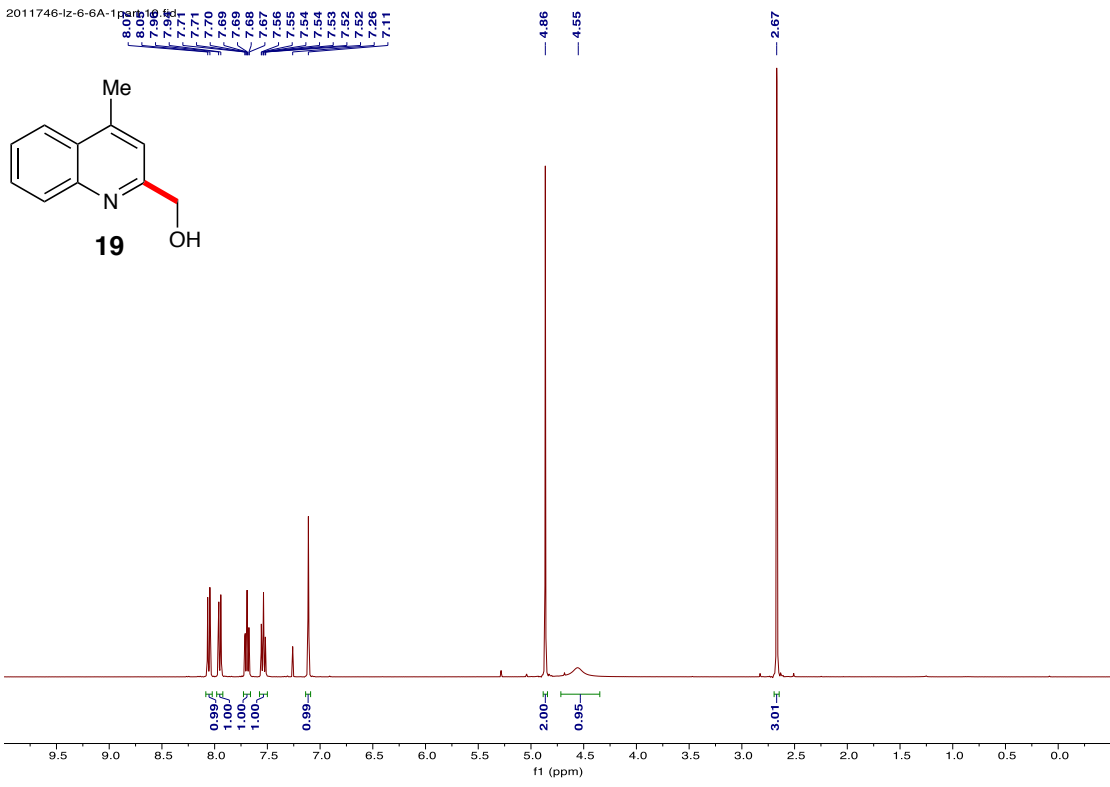

lz-6-6A-1part

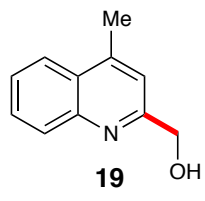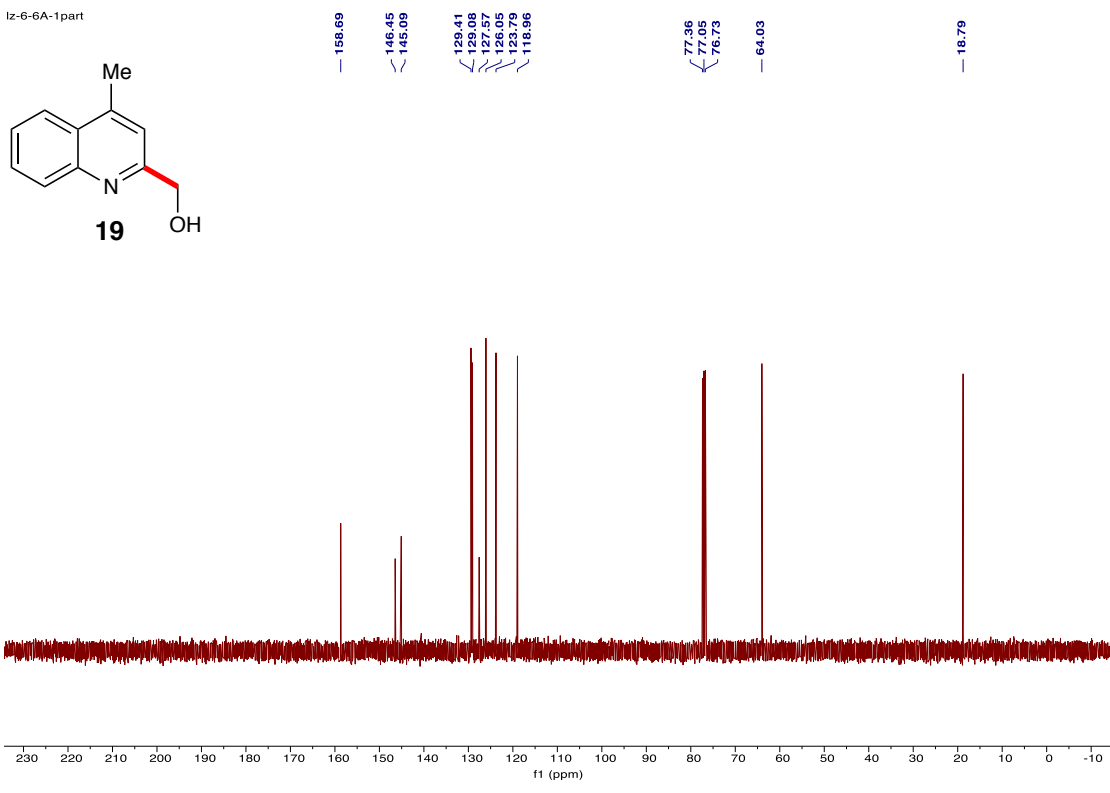

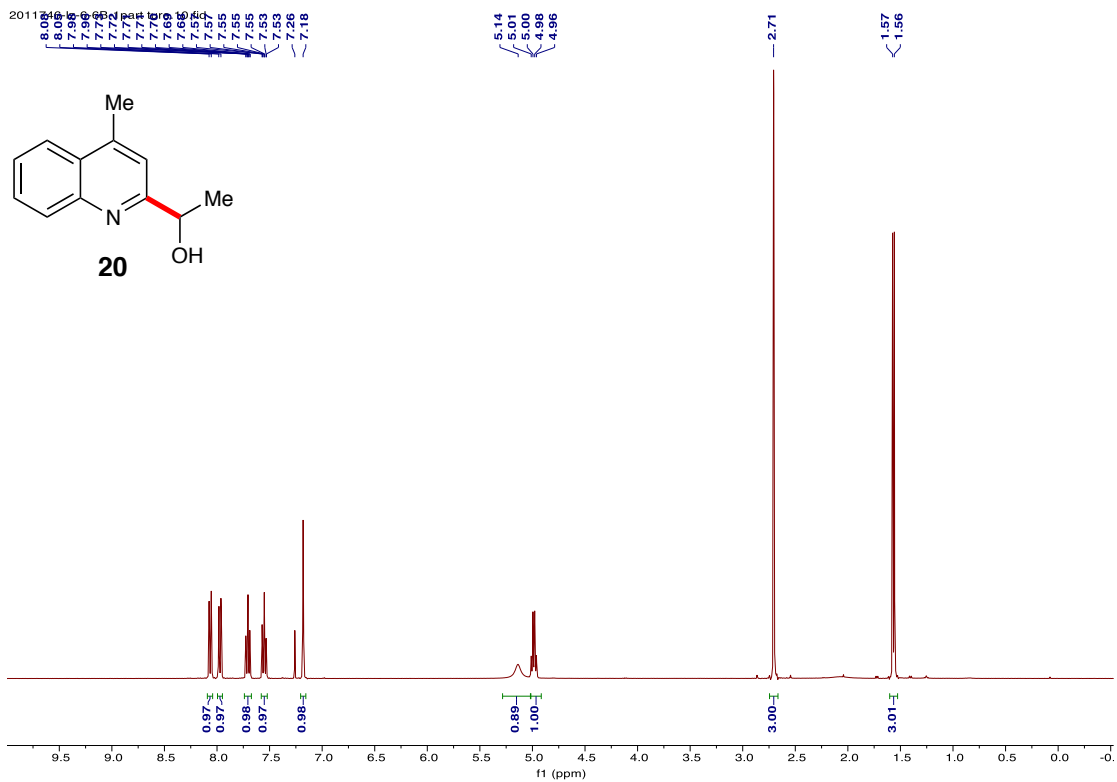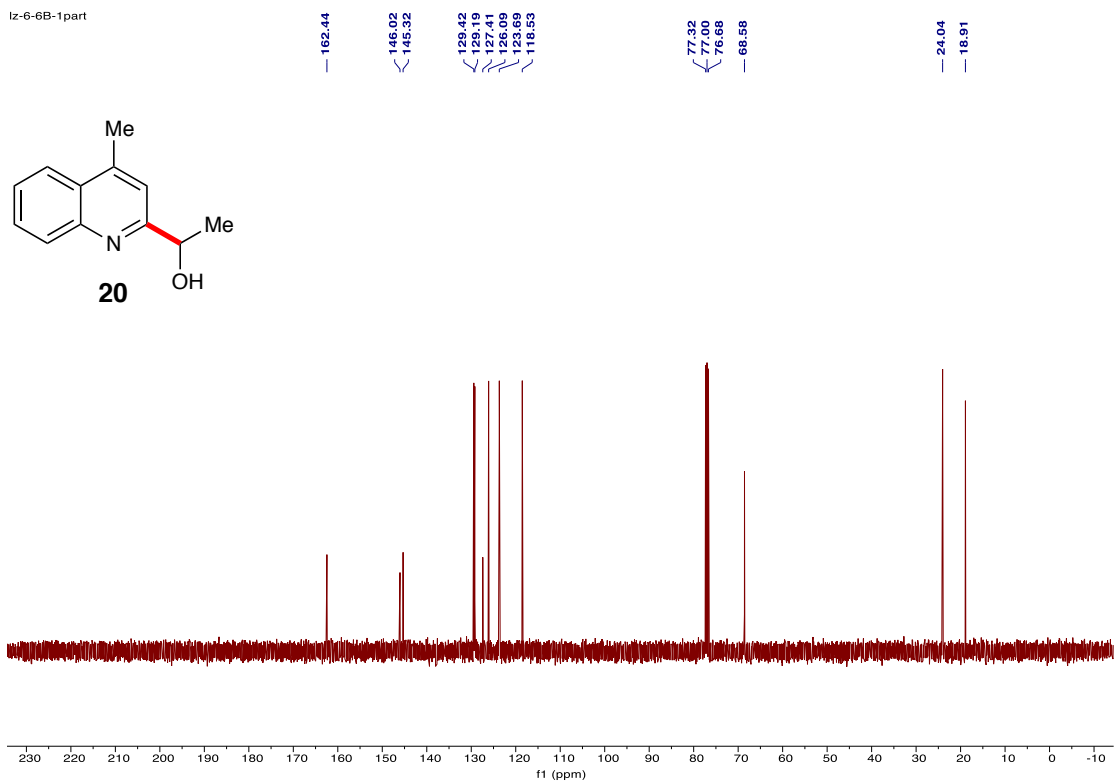

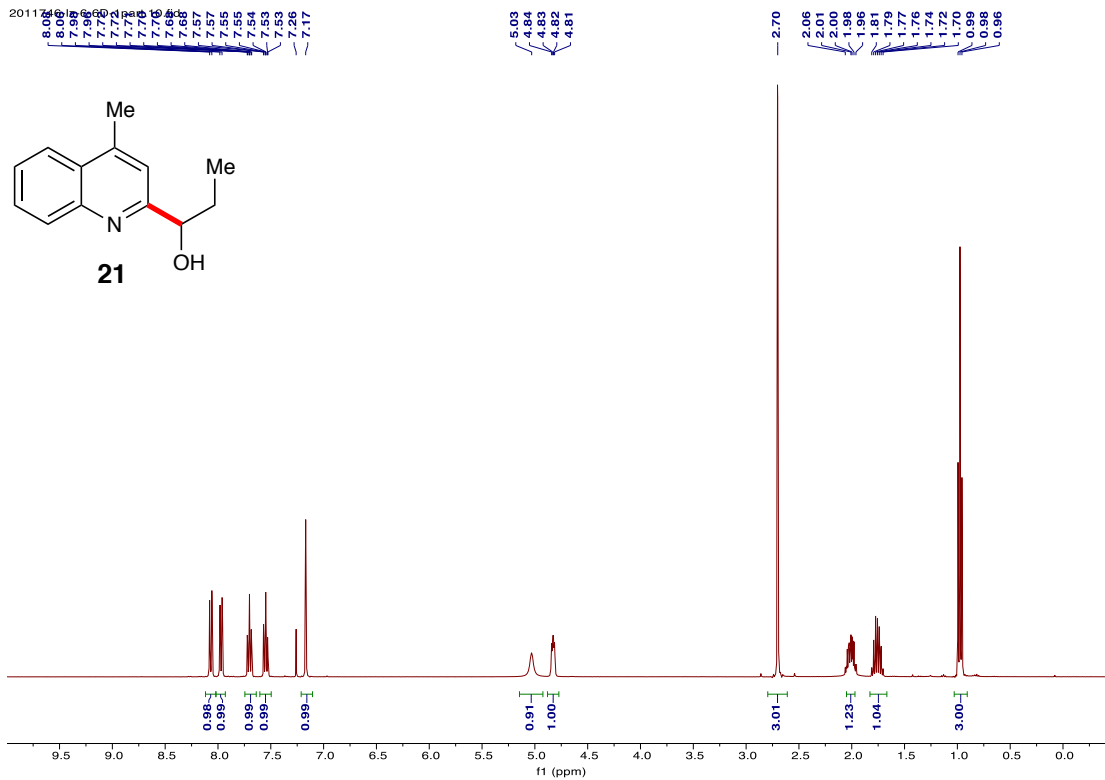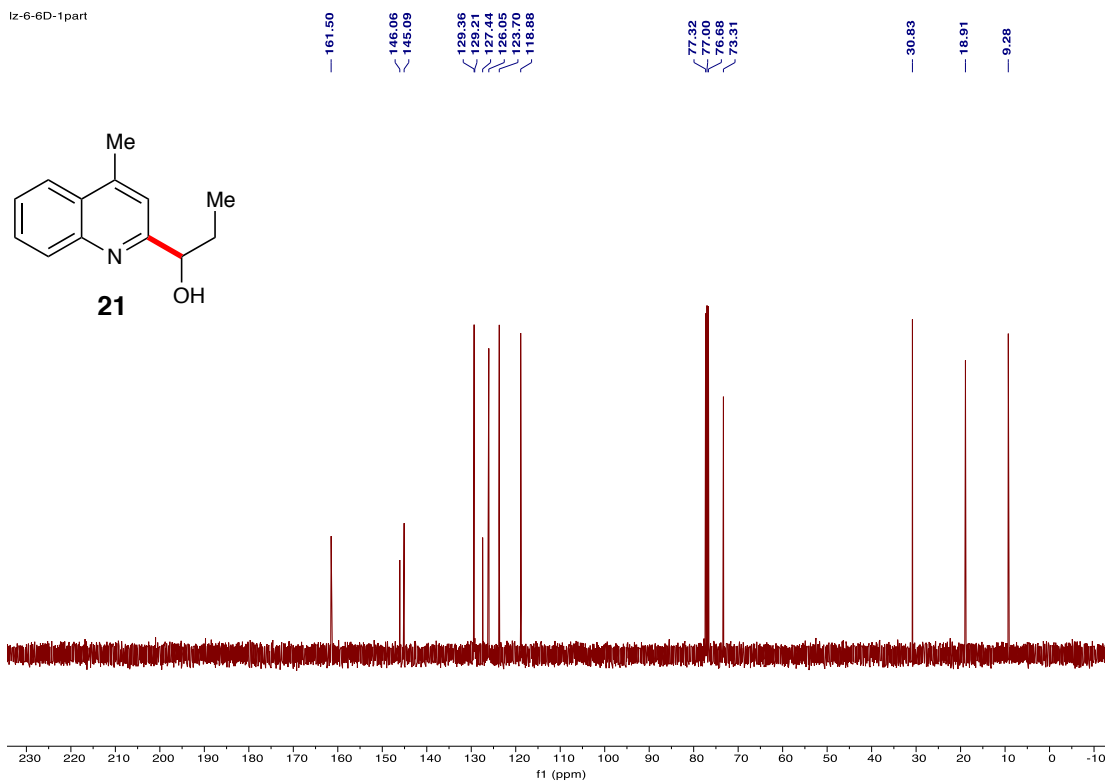

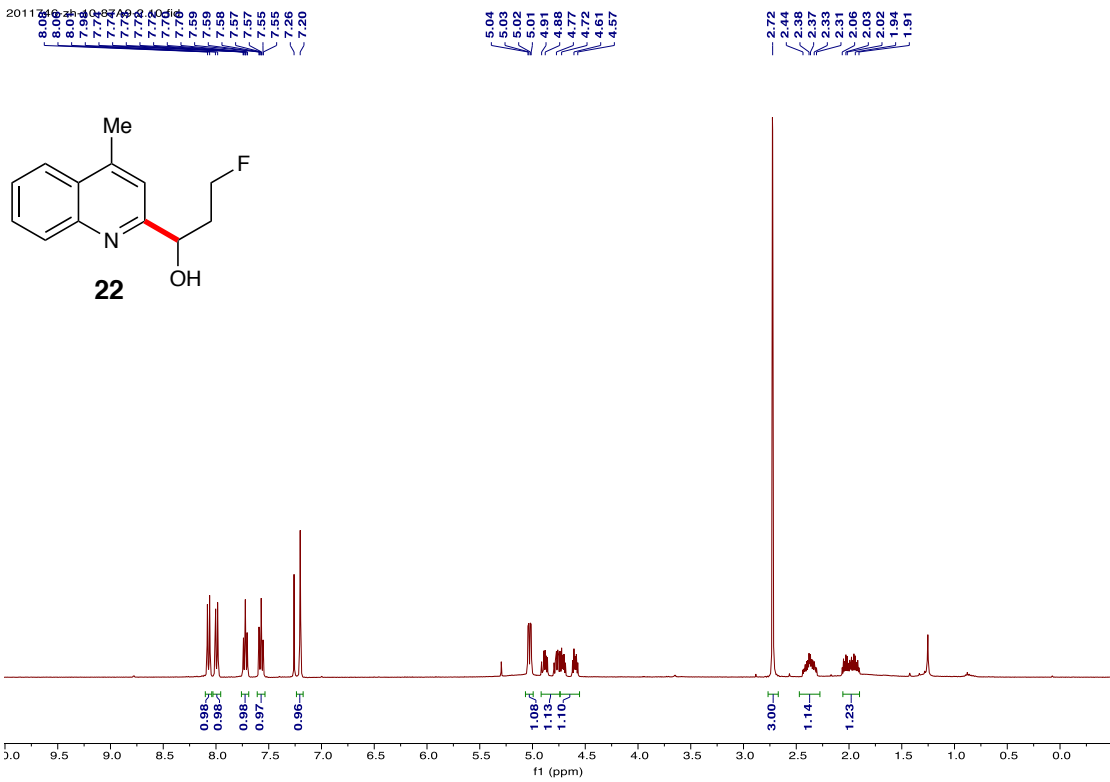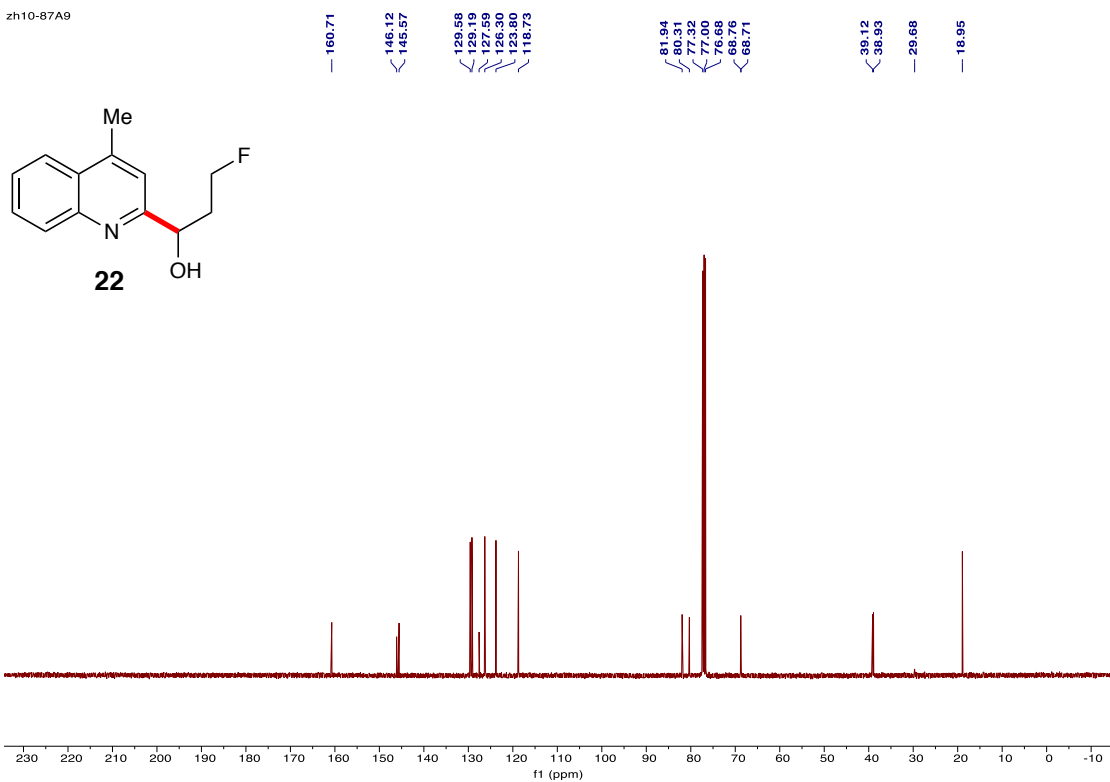

2011746-iz-6-12A

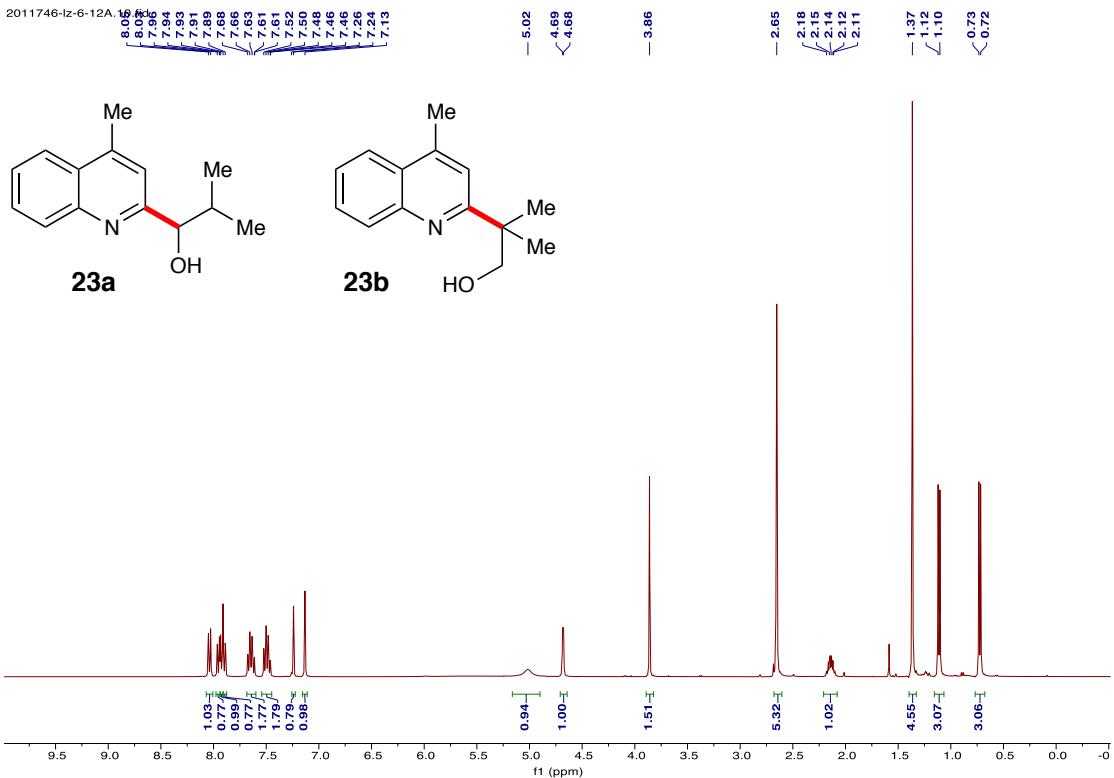

iz-12A

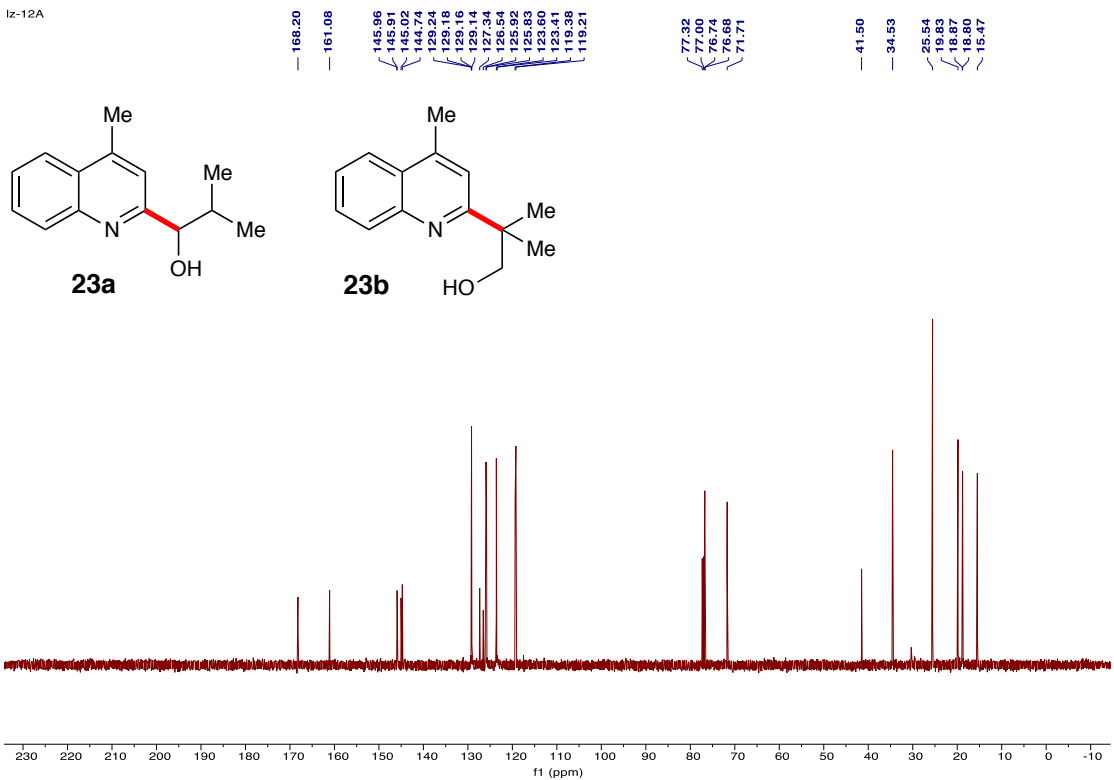

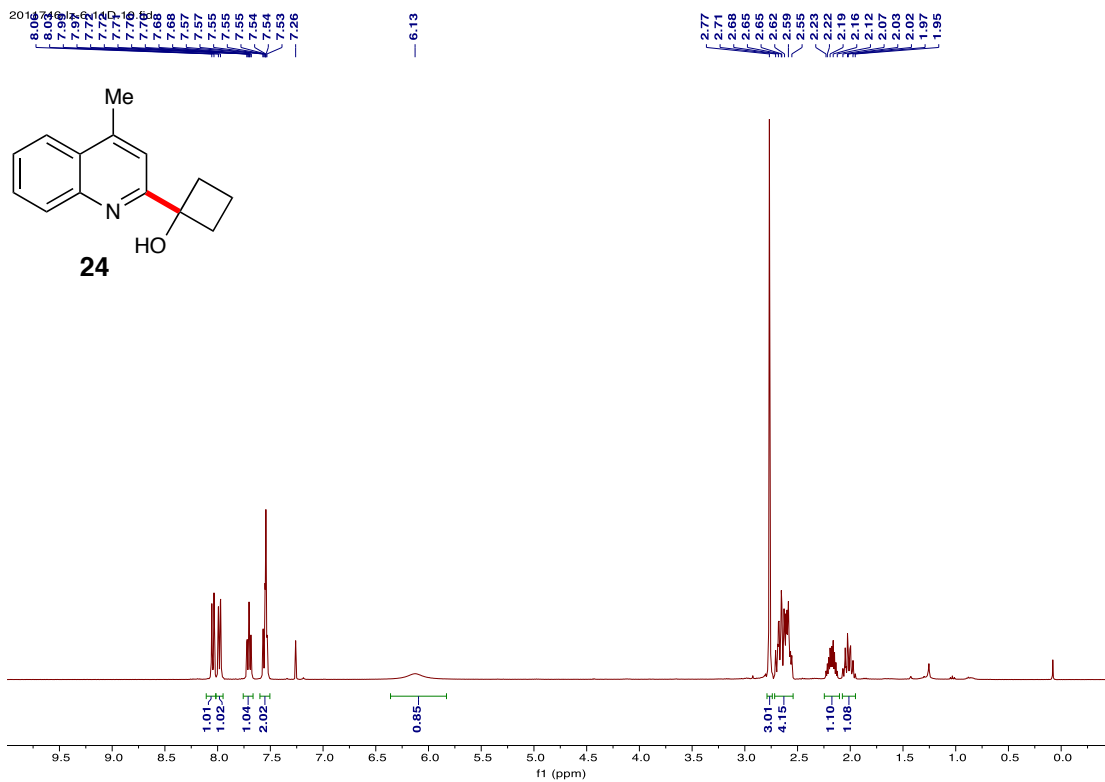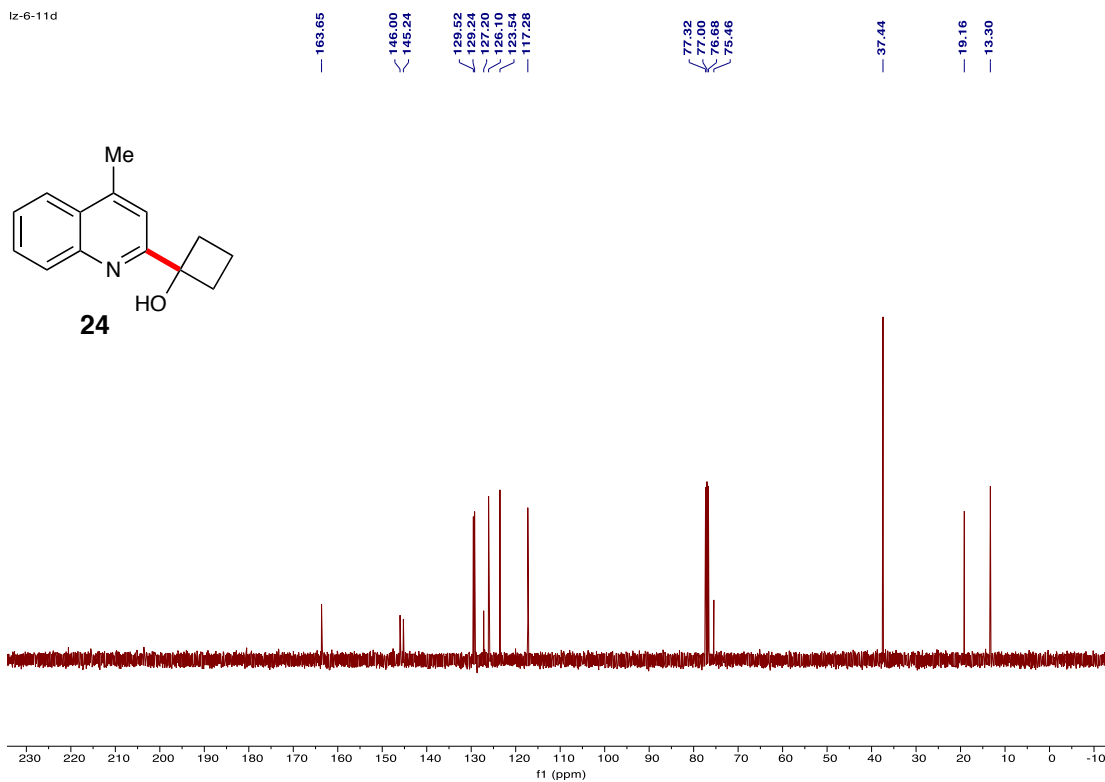



2011746-lzl-6-10g-2-10.fid

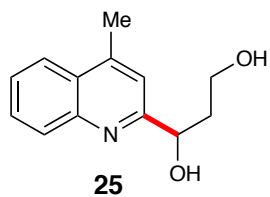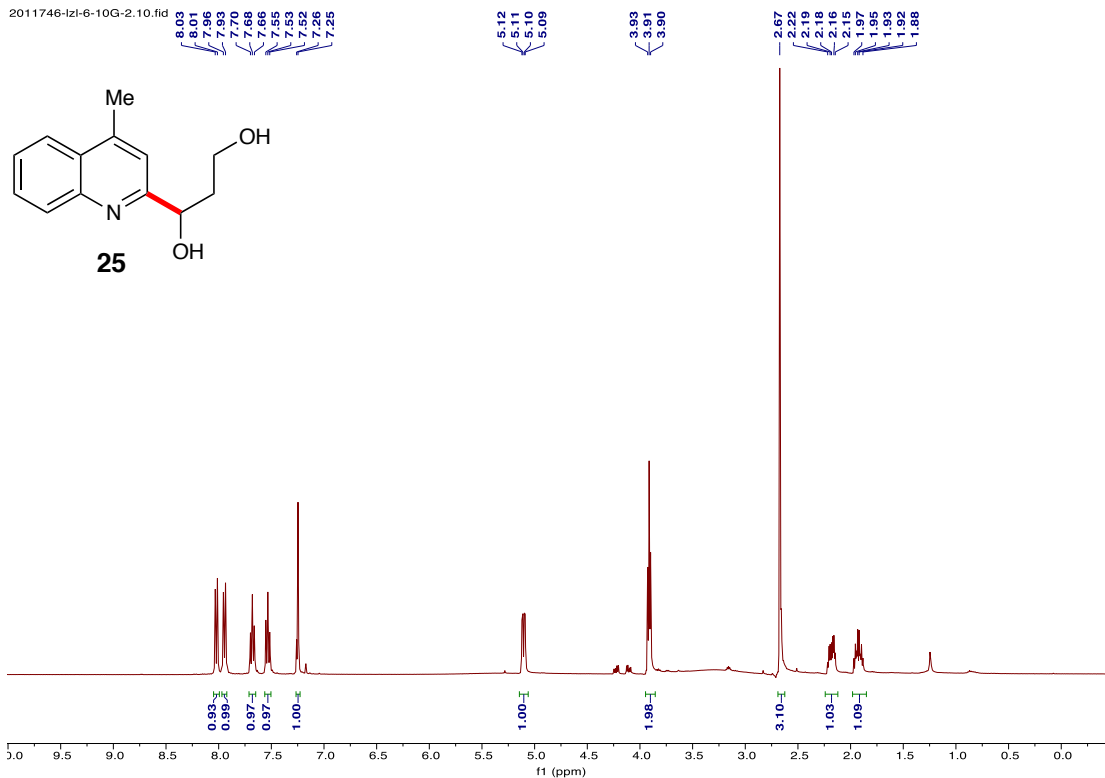

LZL-10g-2

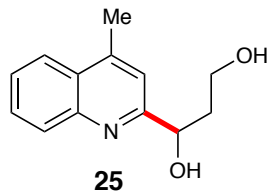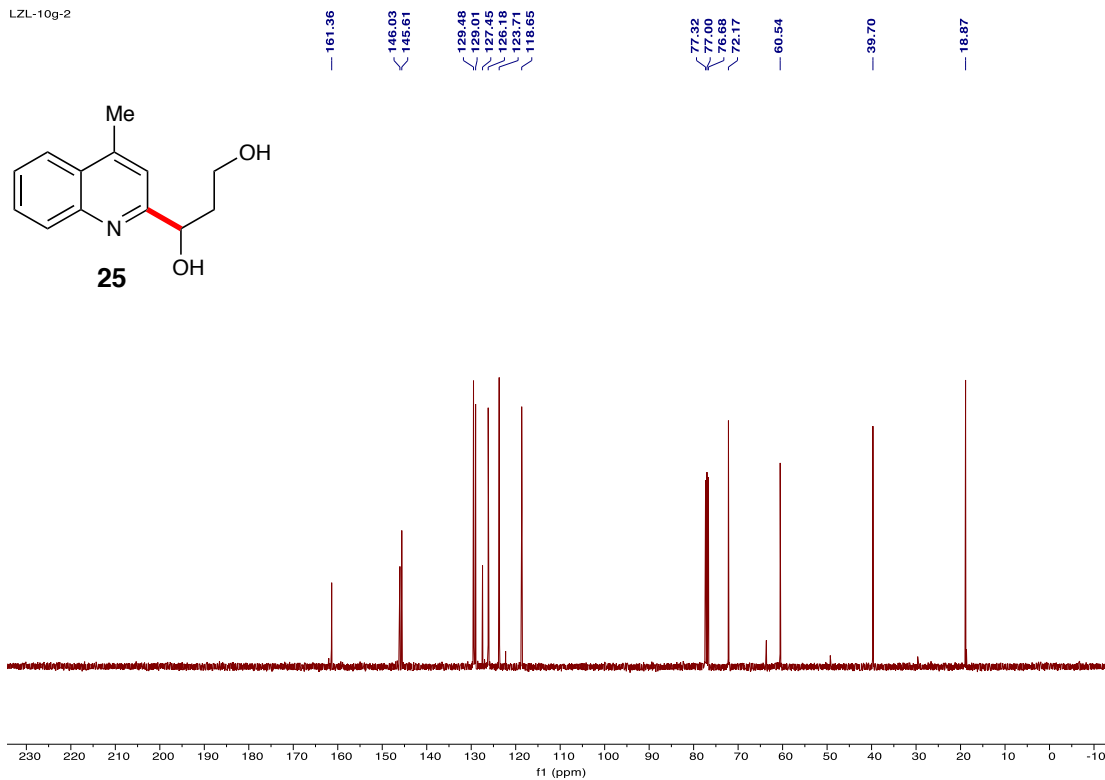

2011746-zh-10-92A

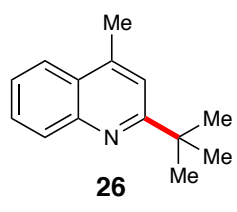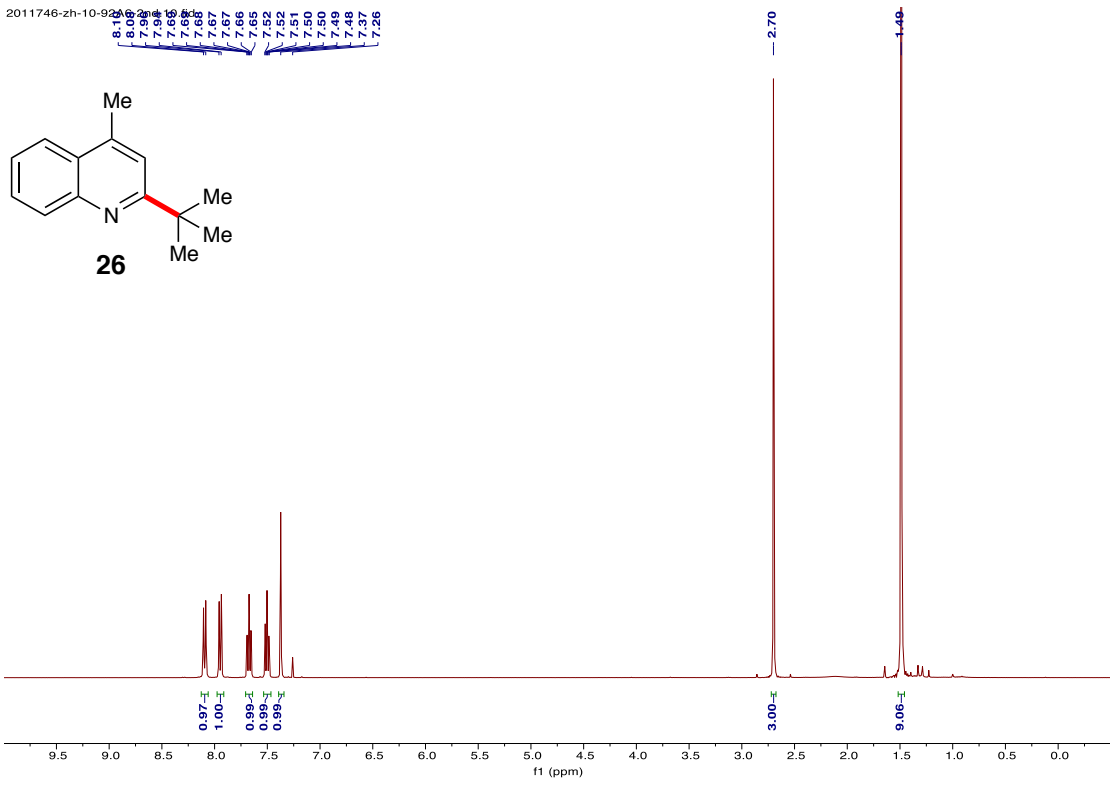

zh-10-92A6

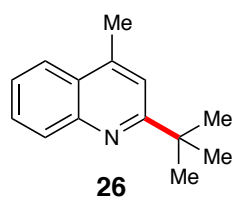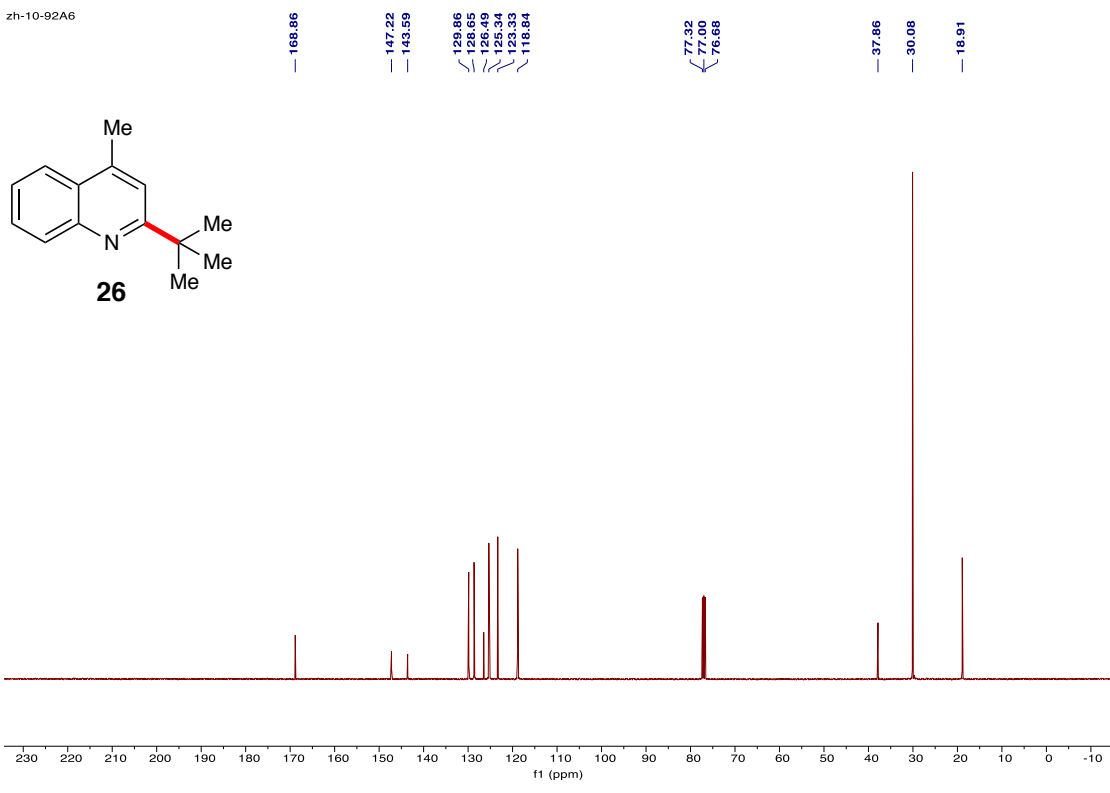

2011746-zh-10-90A2

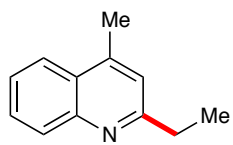

27

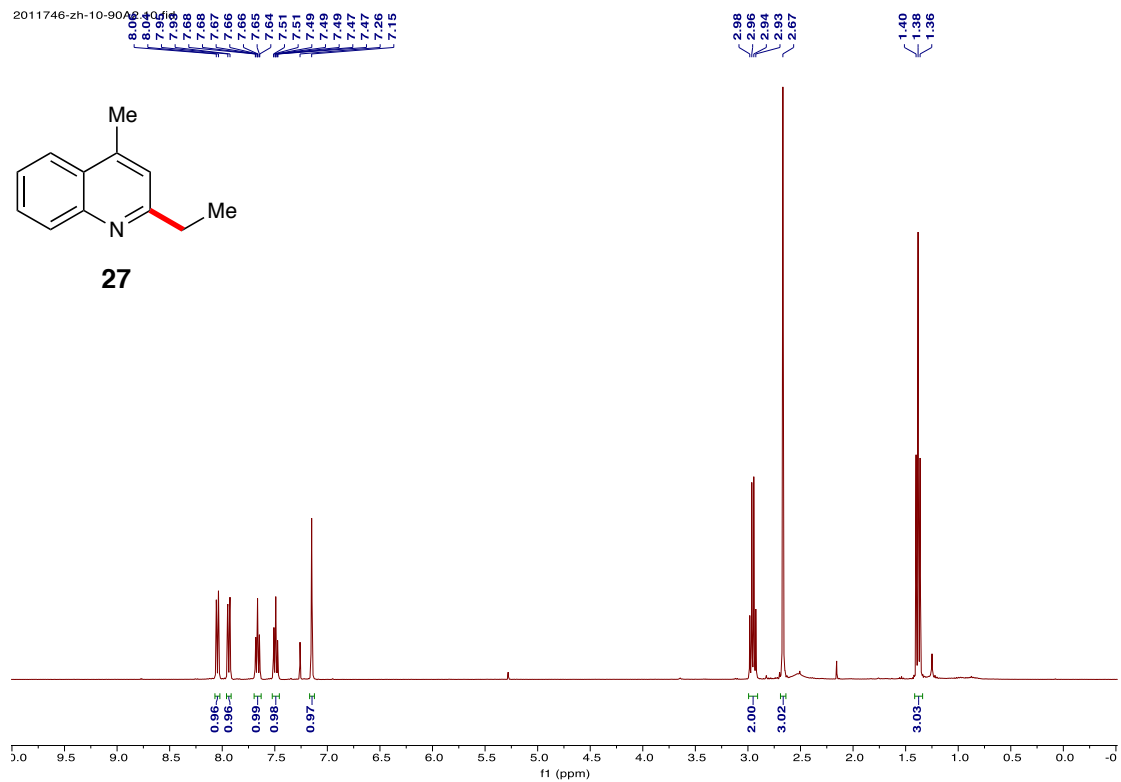

zh10-90A2

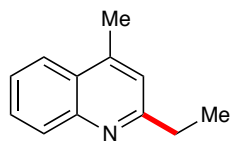

27

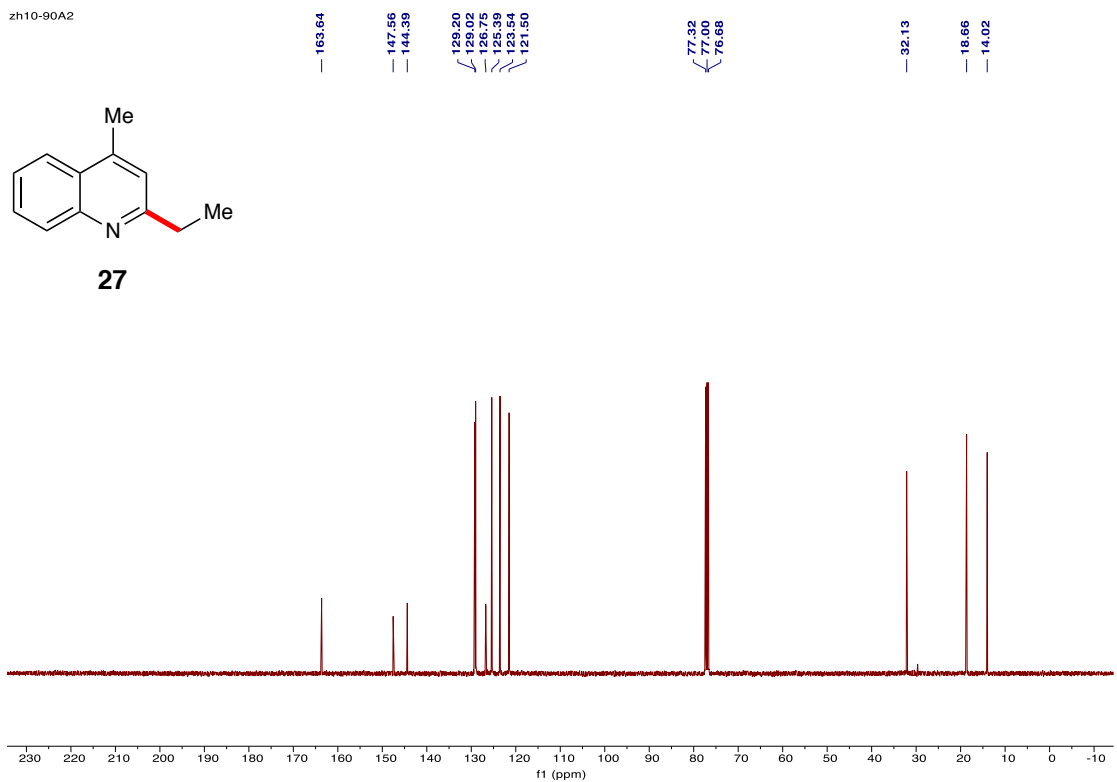

2011746-zh-10-73B10-prod

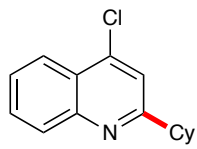

28

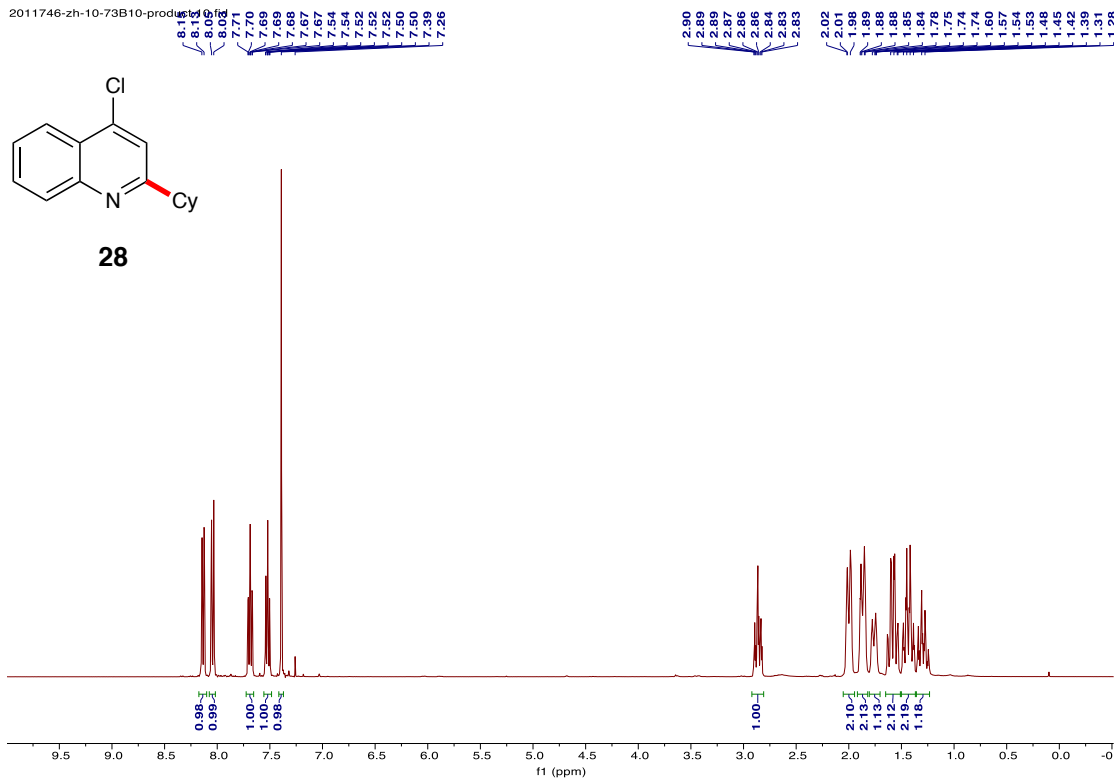

zh-10-73b10

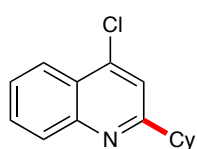

28

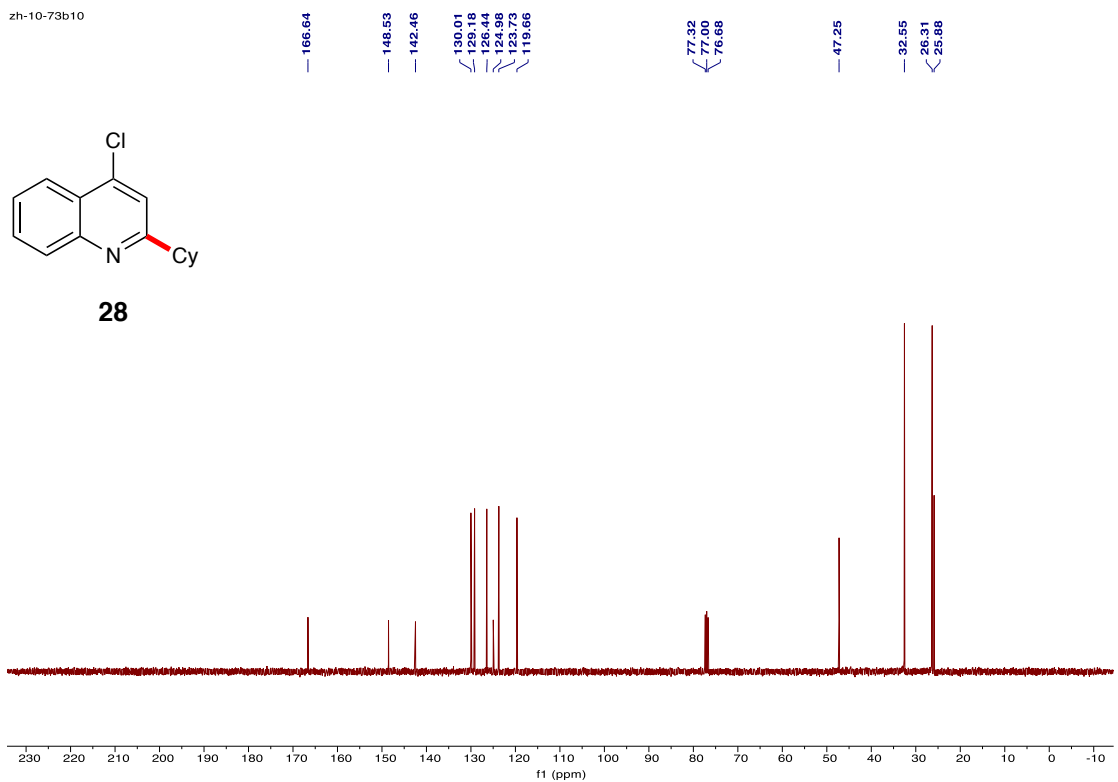

2011746-zh-10-73B8-prod

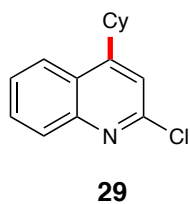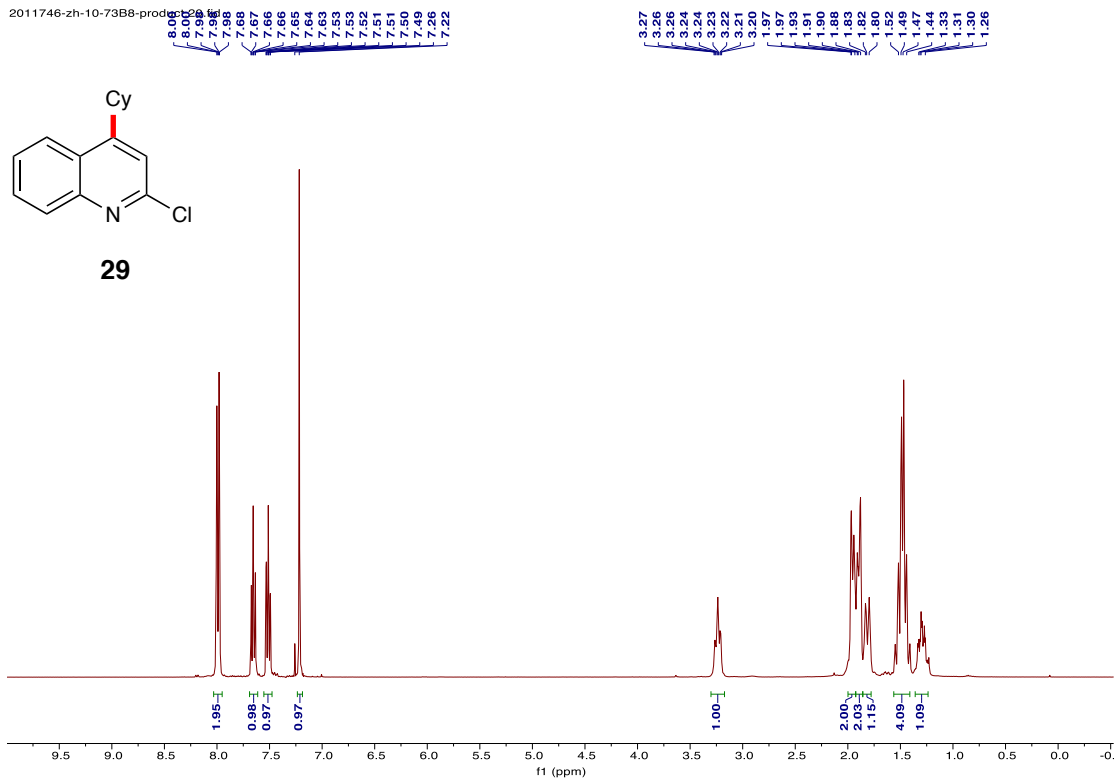

zh-10-73b8

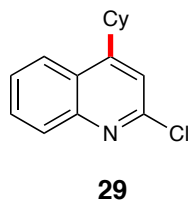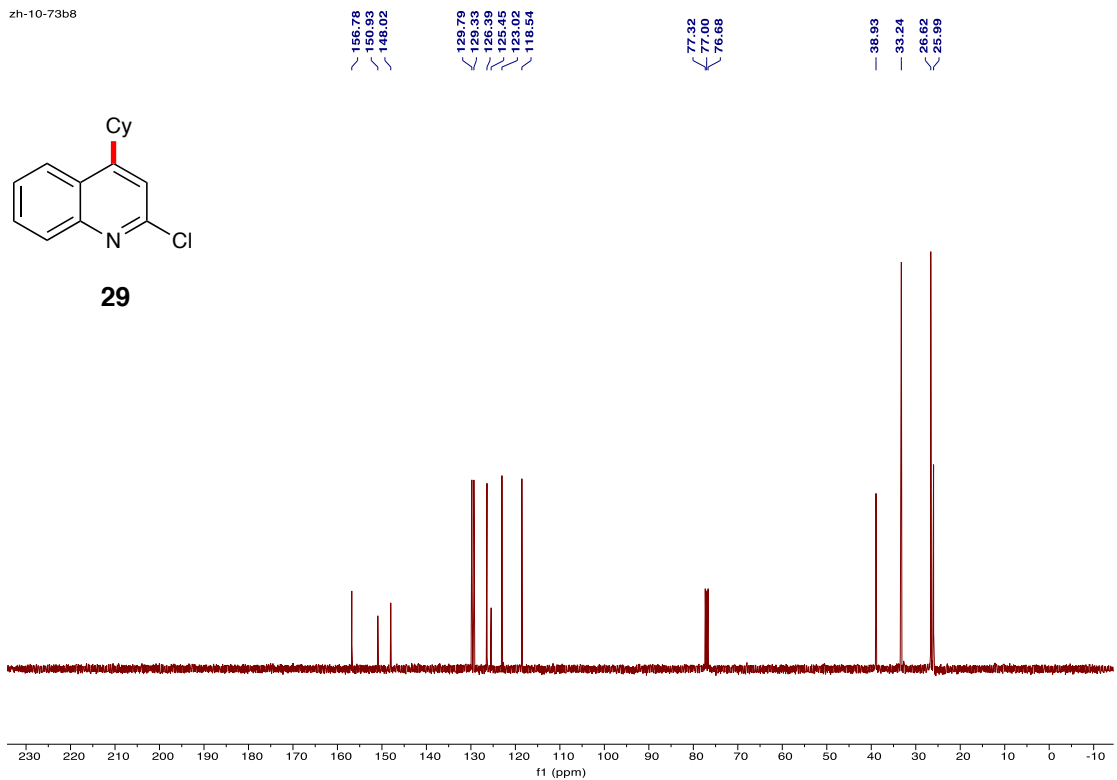

2011746-zh-10

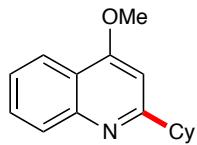

30

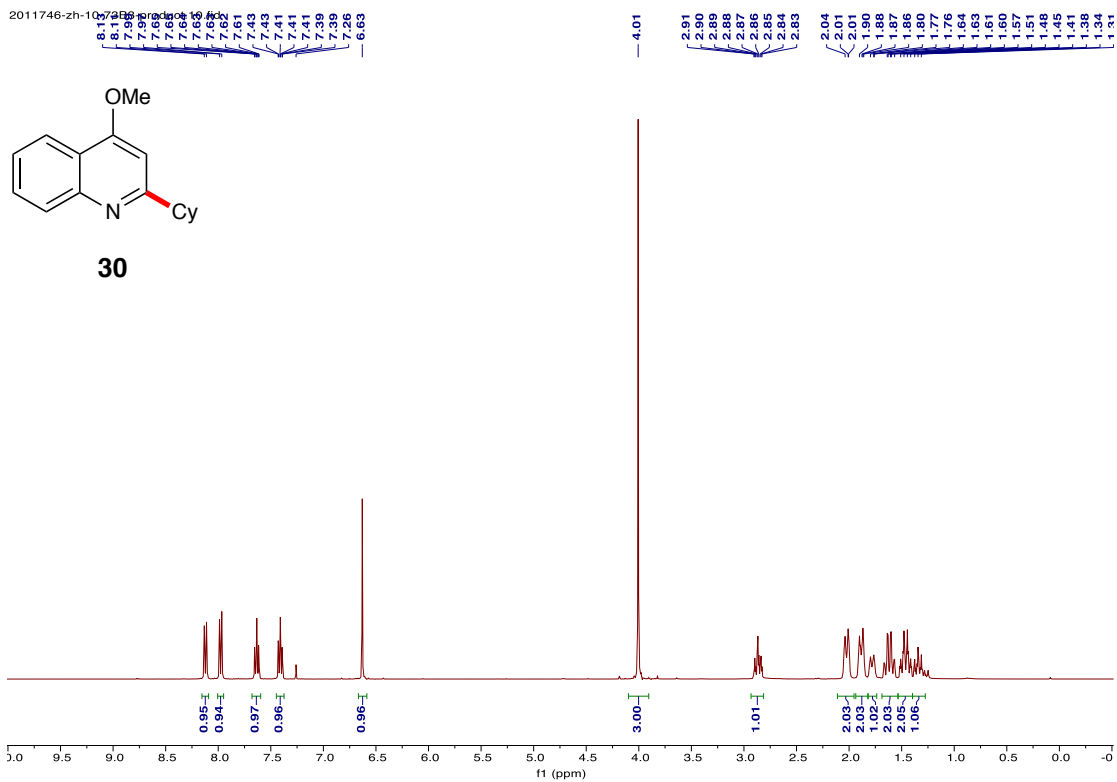

zh-10-73b3

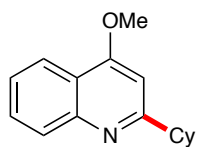

30

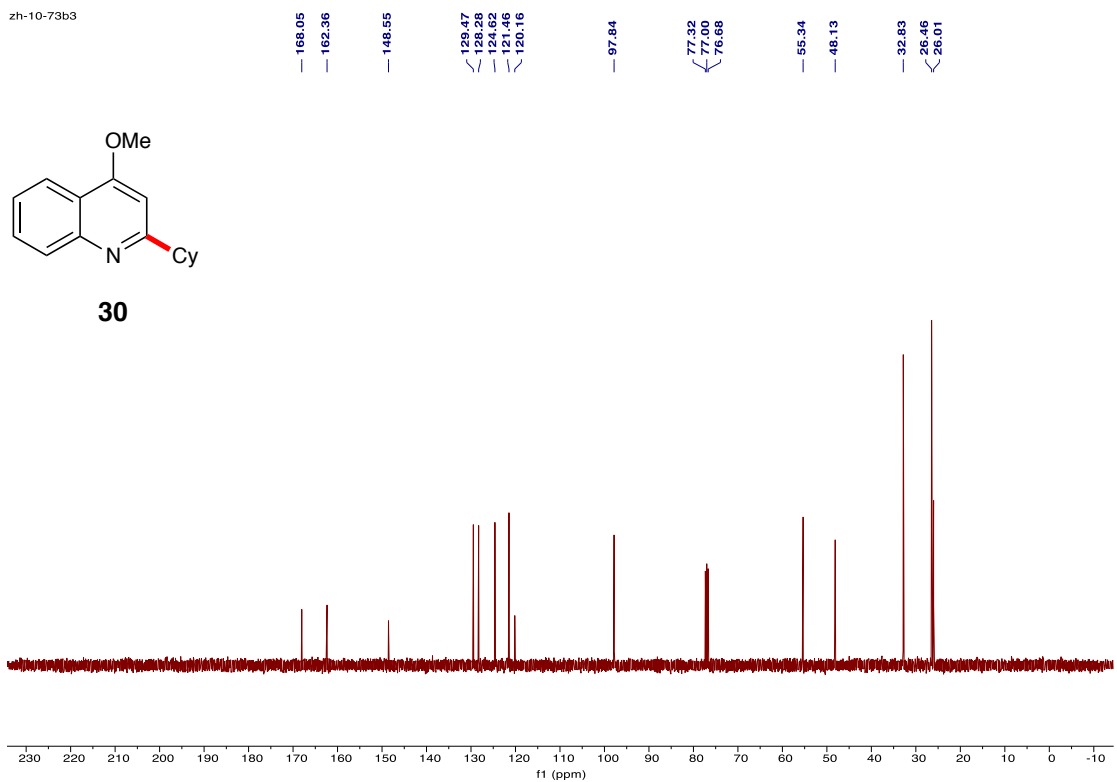

2011746-zh-10-80A1

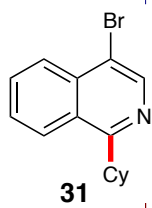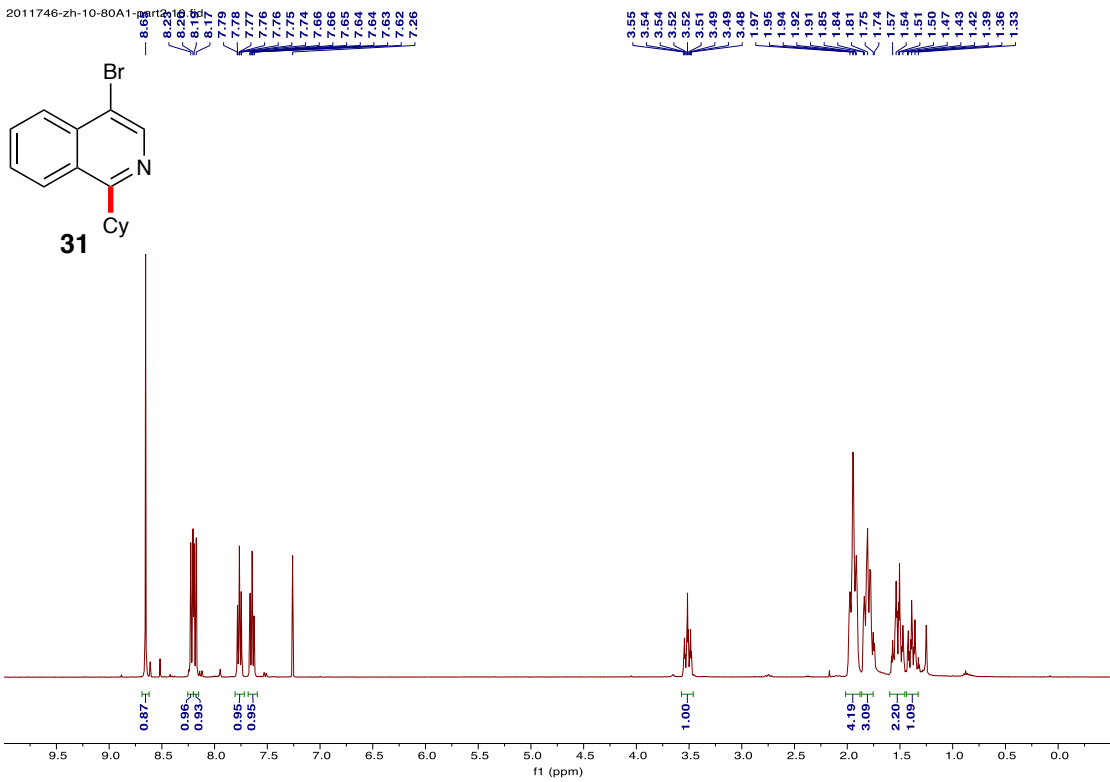

zh10-80A1

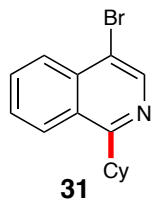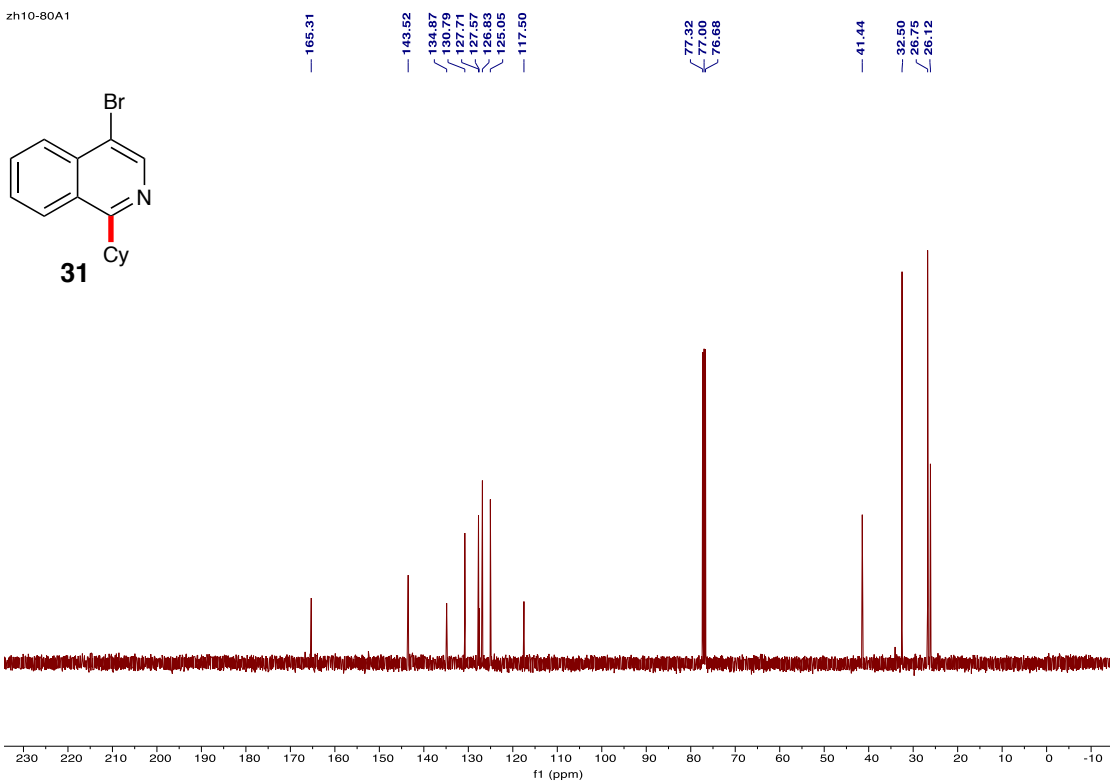

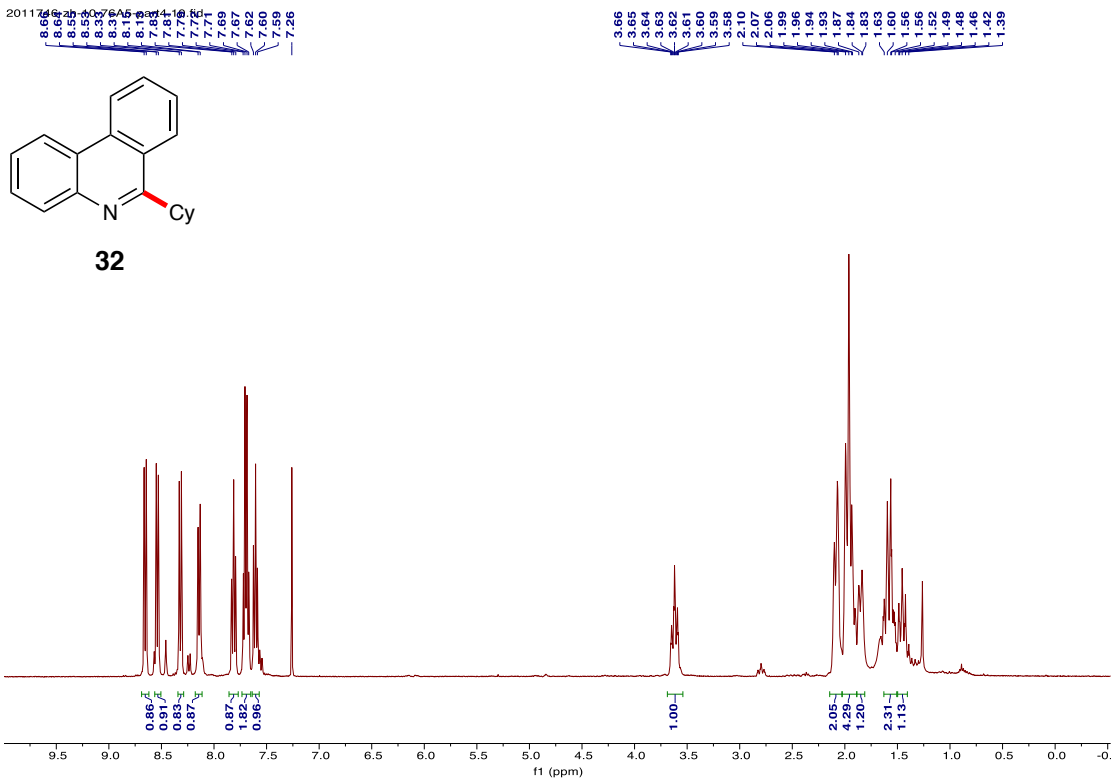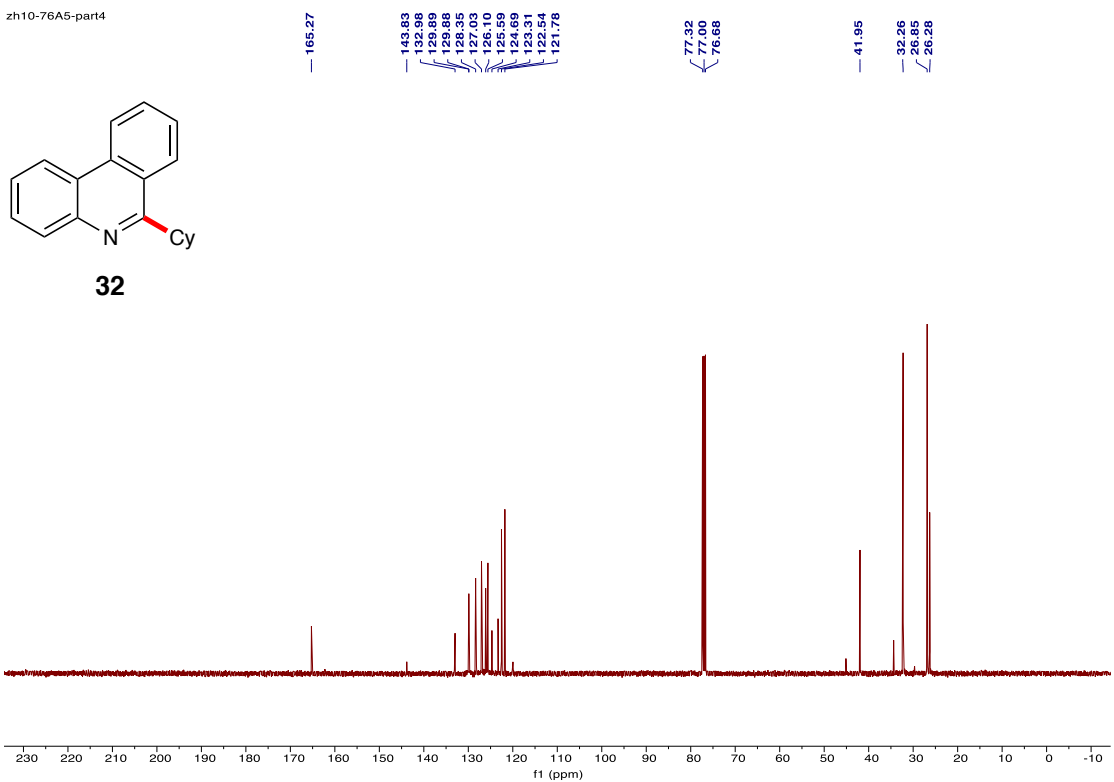



2011746-zh-10-73A3

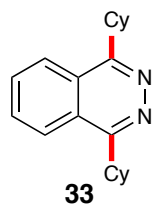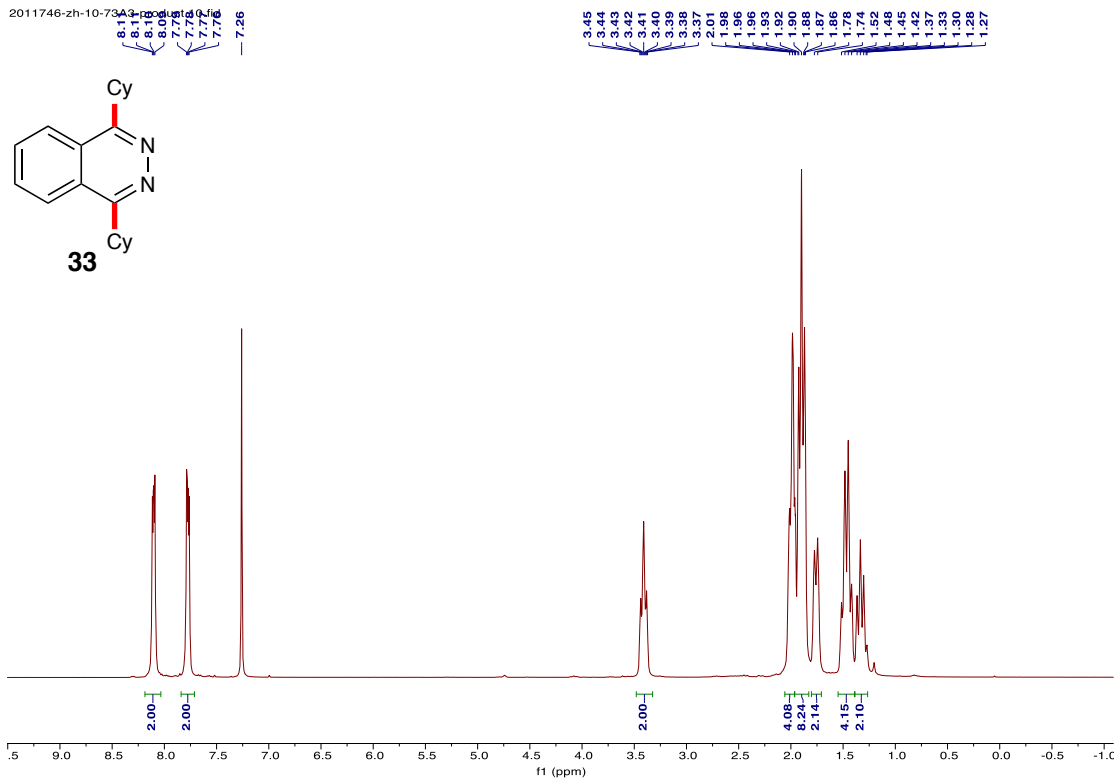

zh-10-73A3

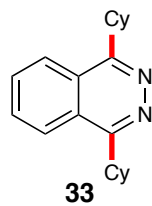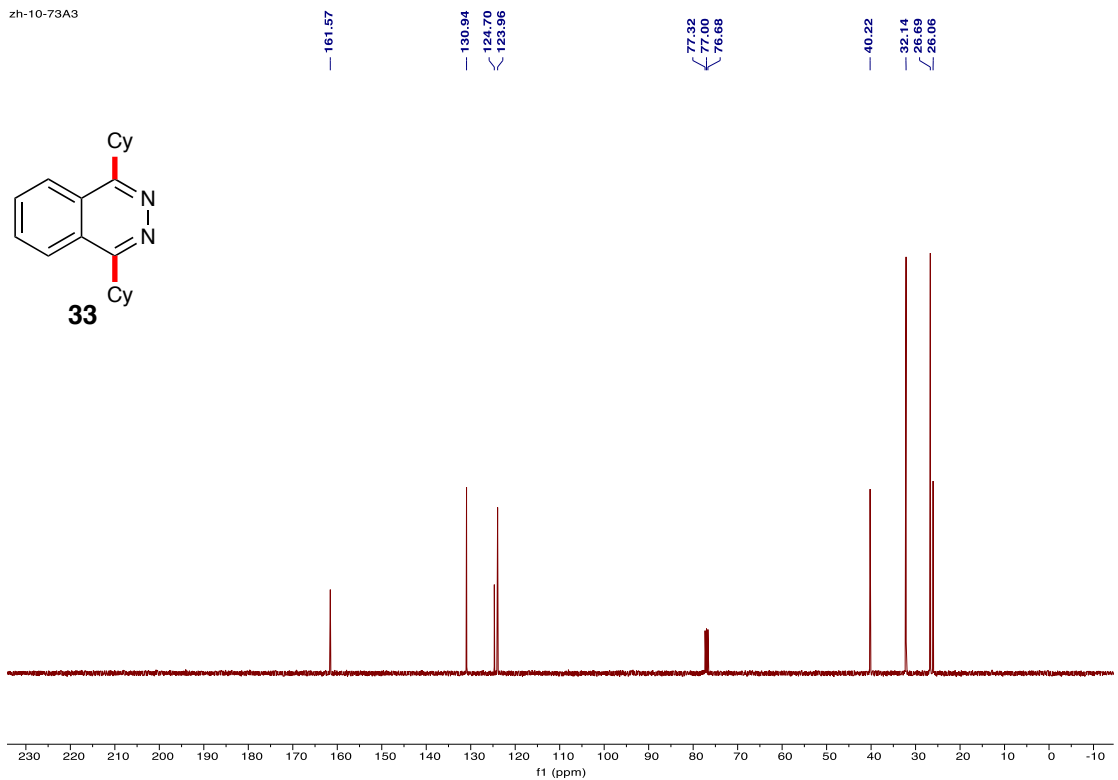

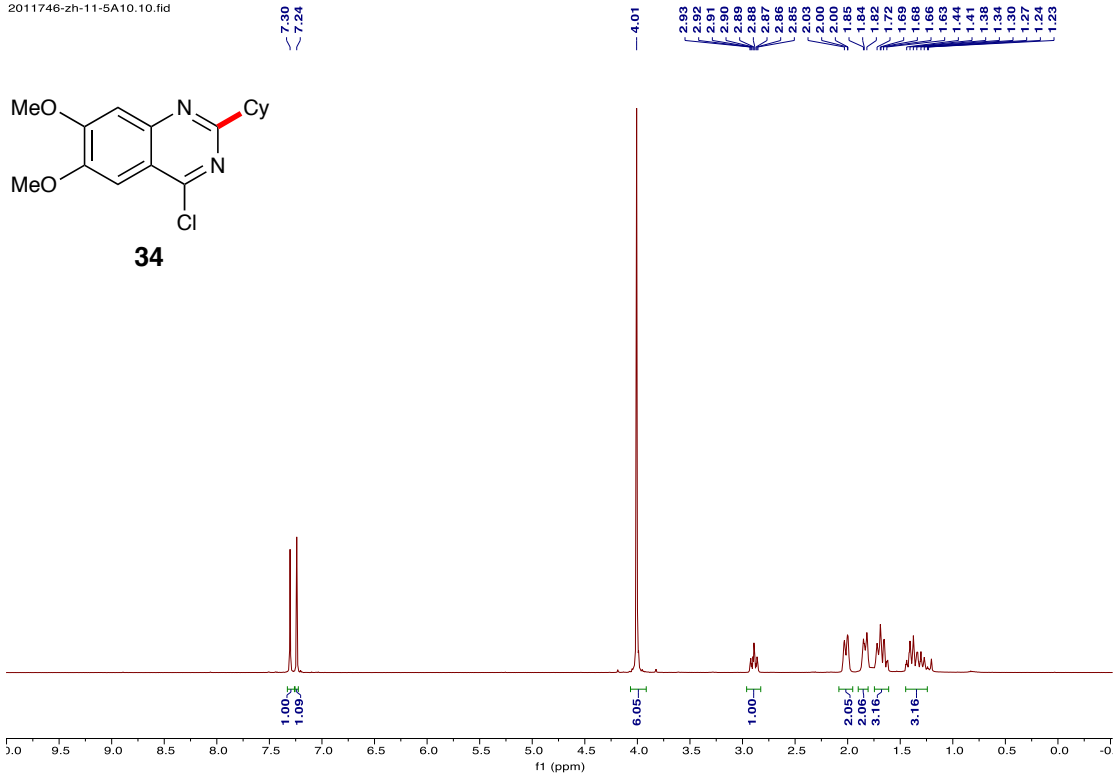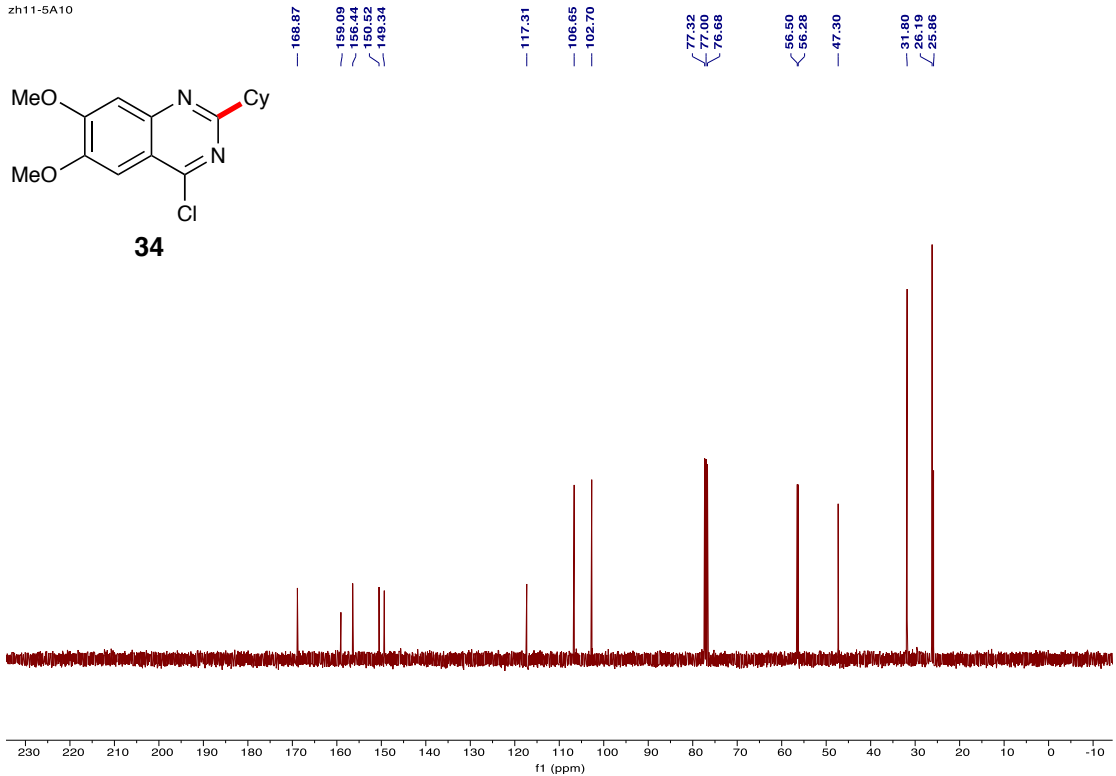

2011746-zh-10-76A8

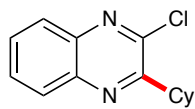

35

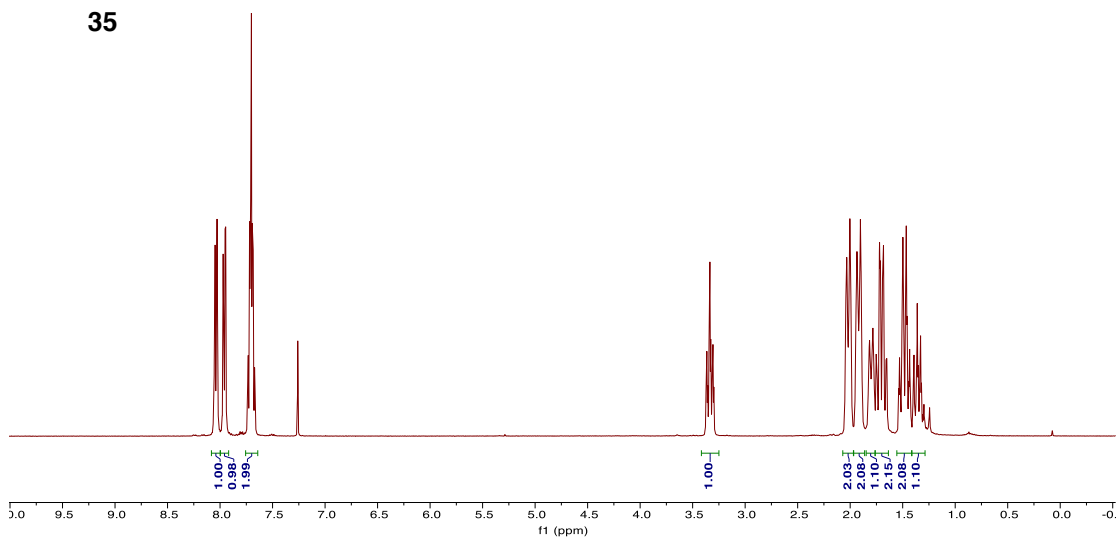

-zh-76A8

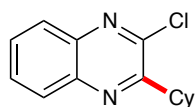

35

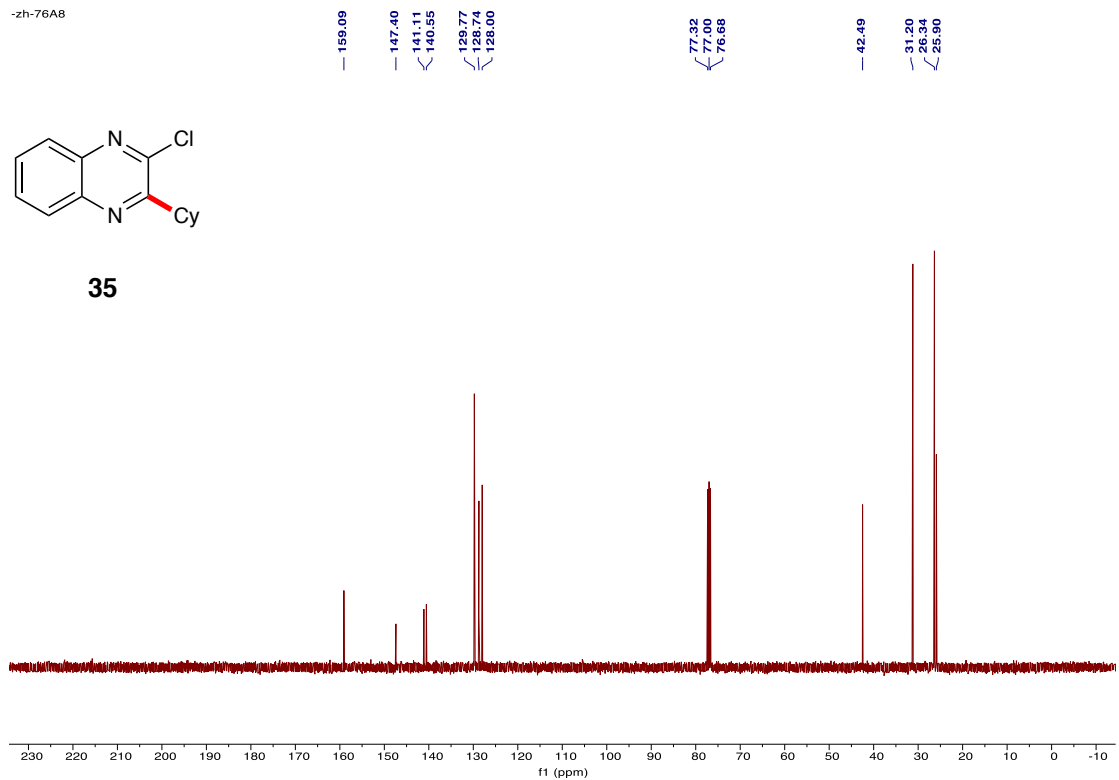

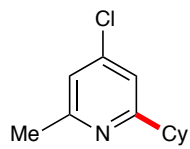

**36**

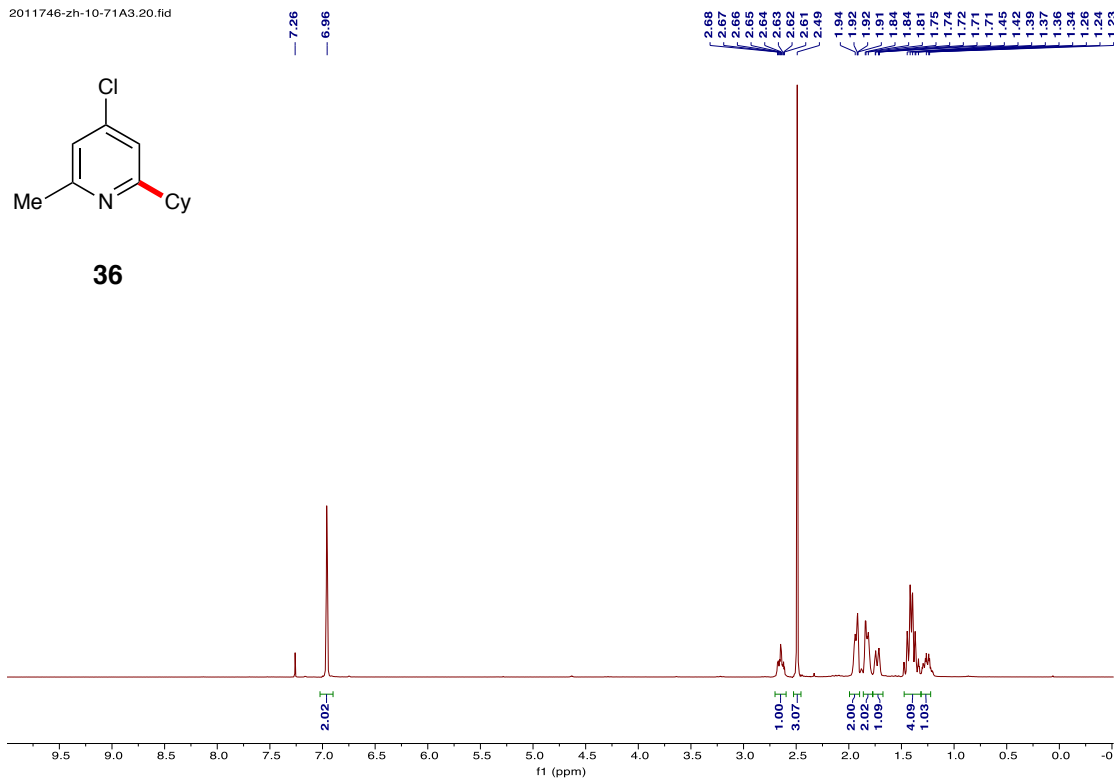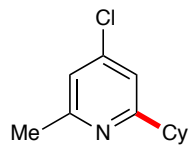

**36**

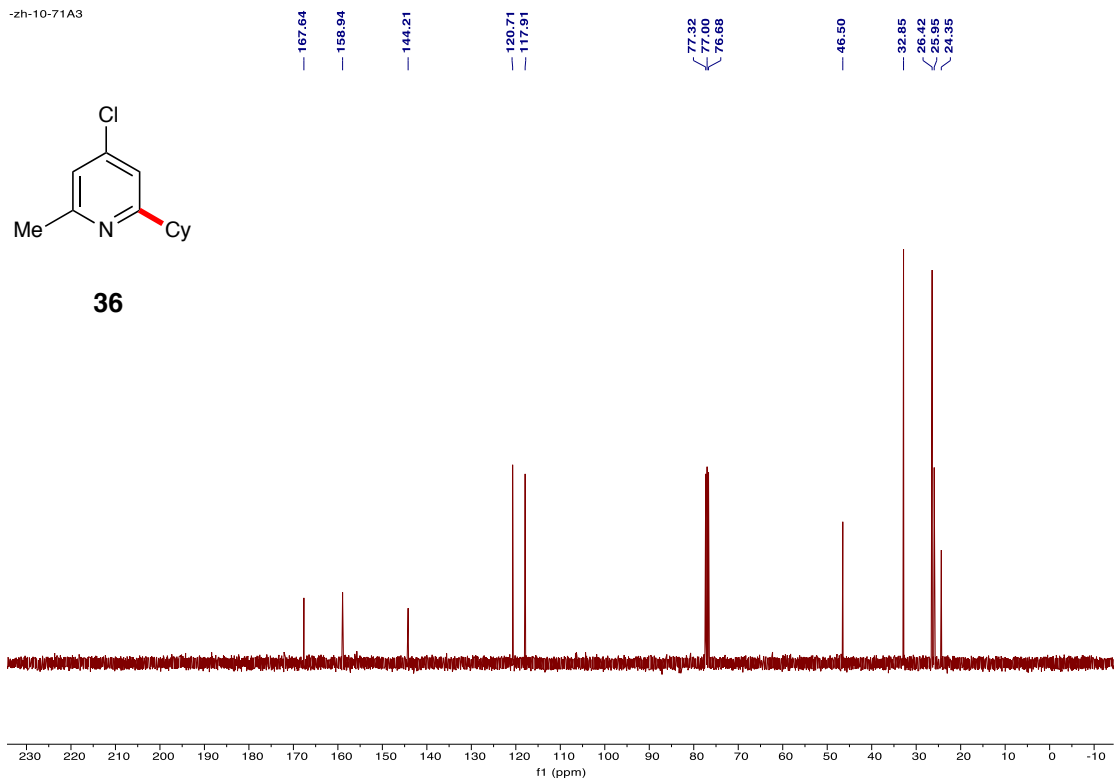

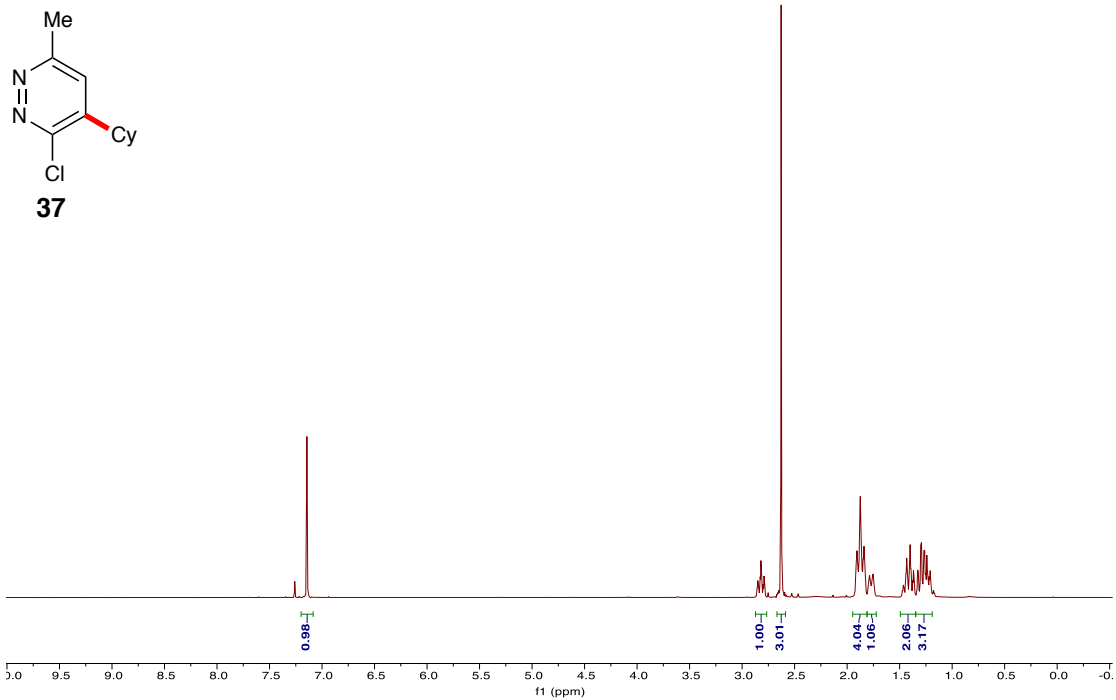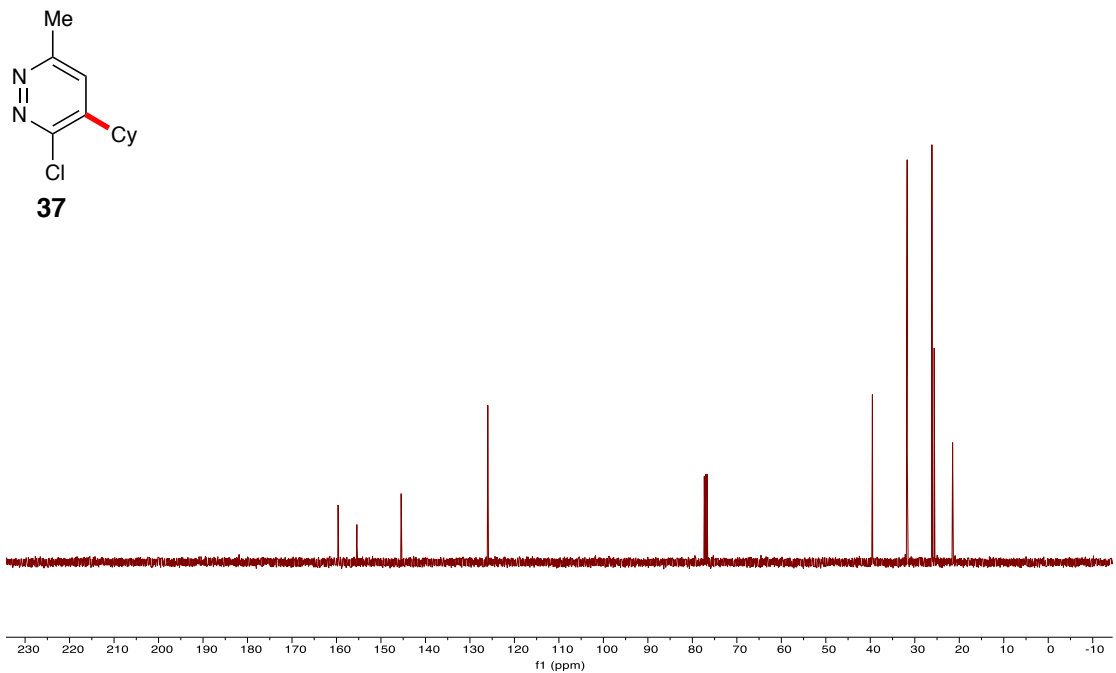

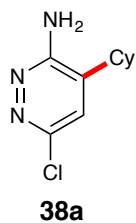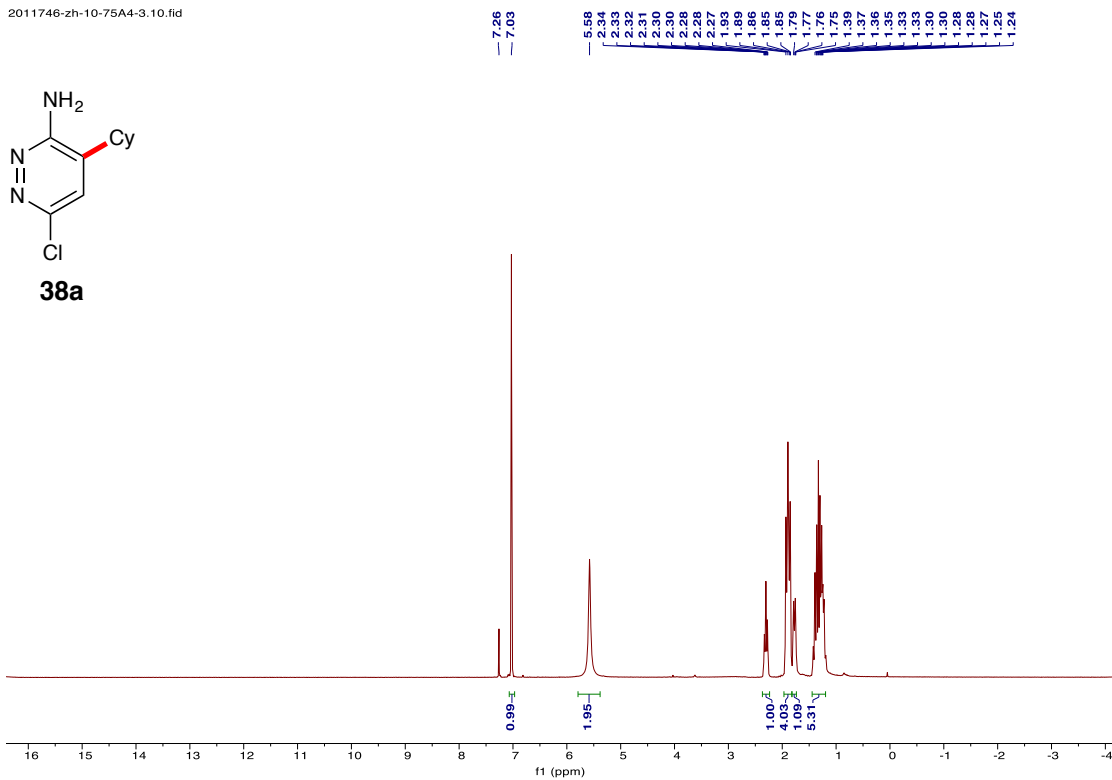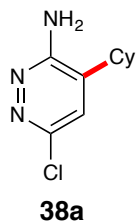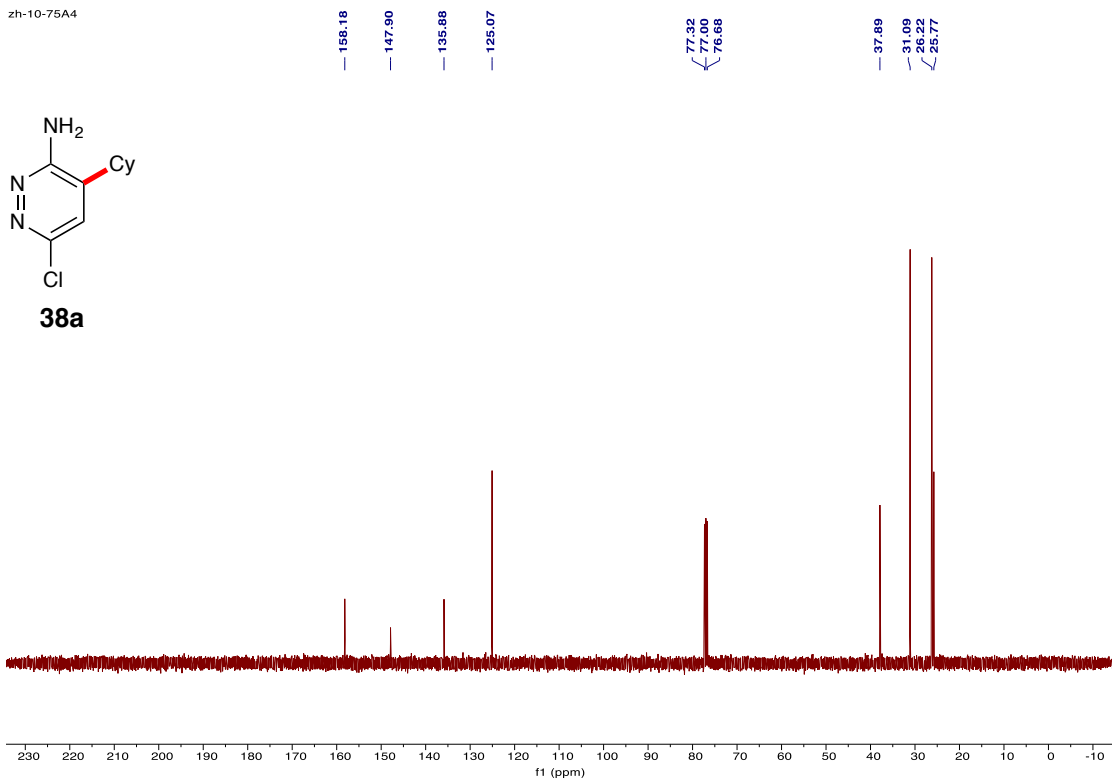

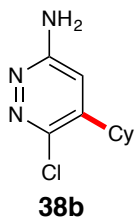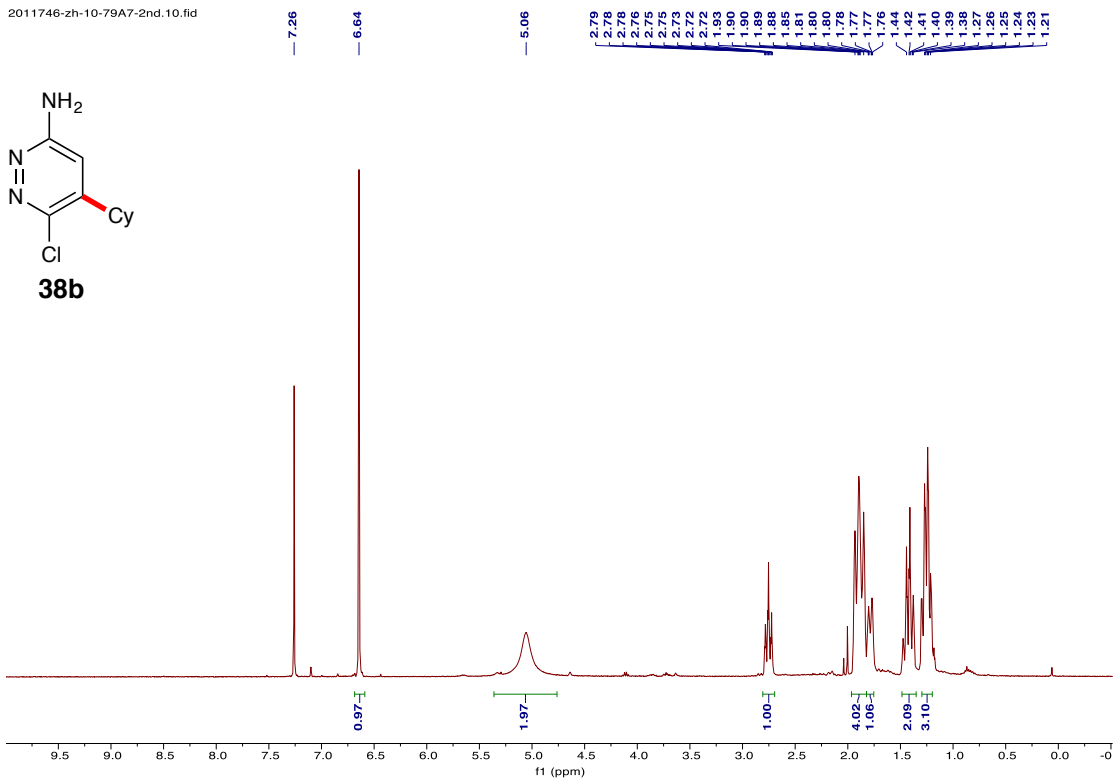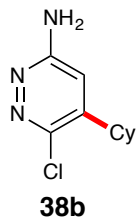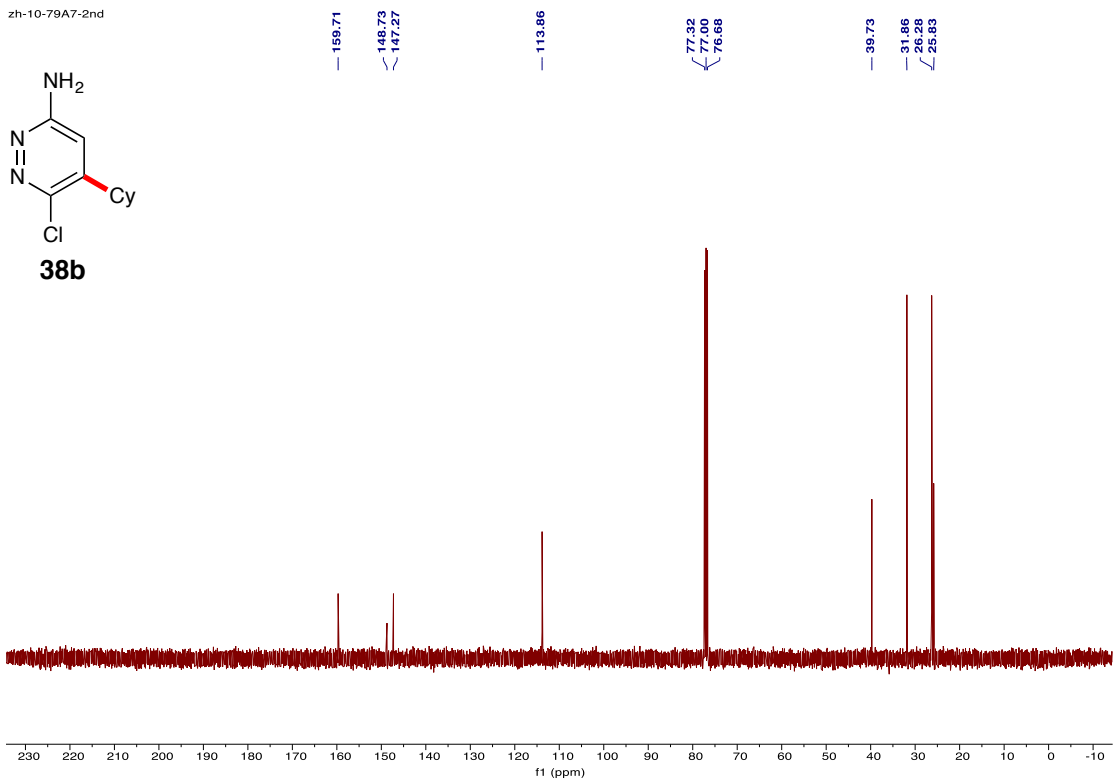

2011746-zh-10-75A22-2nd-10.fid

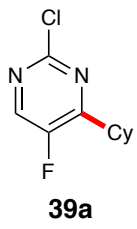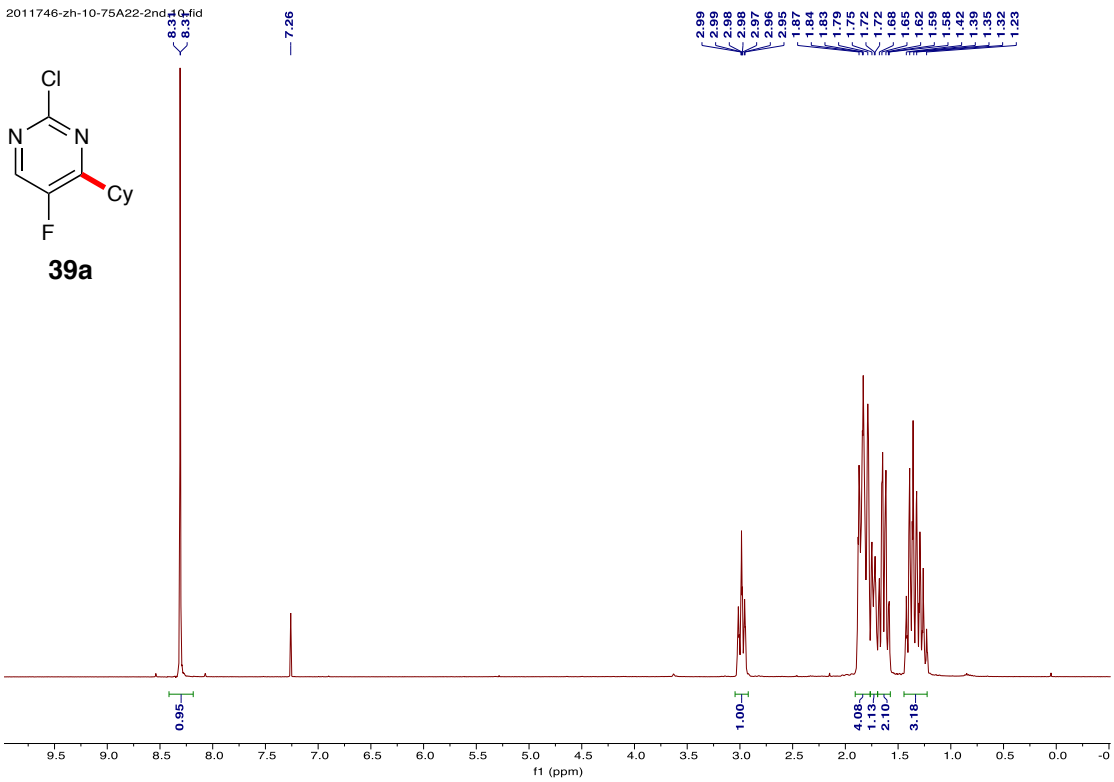

zh-10-75A22-2nd

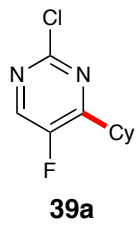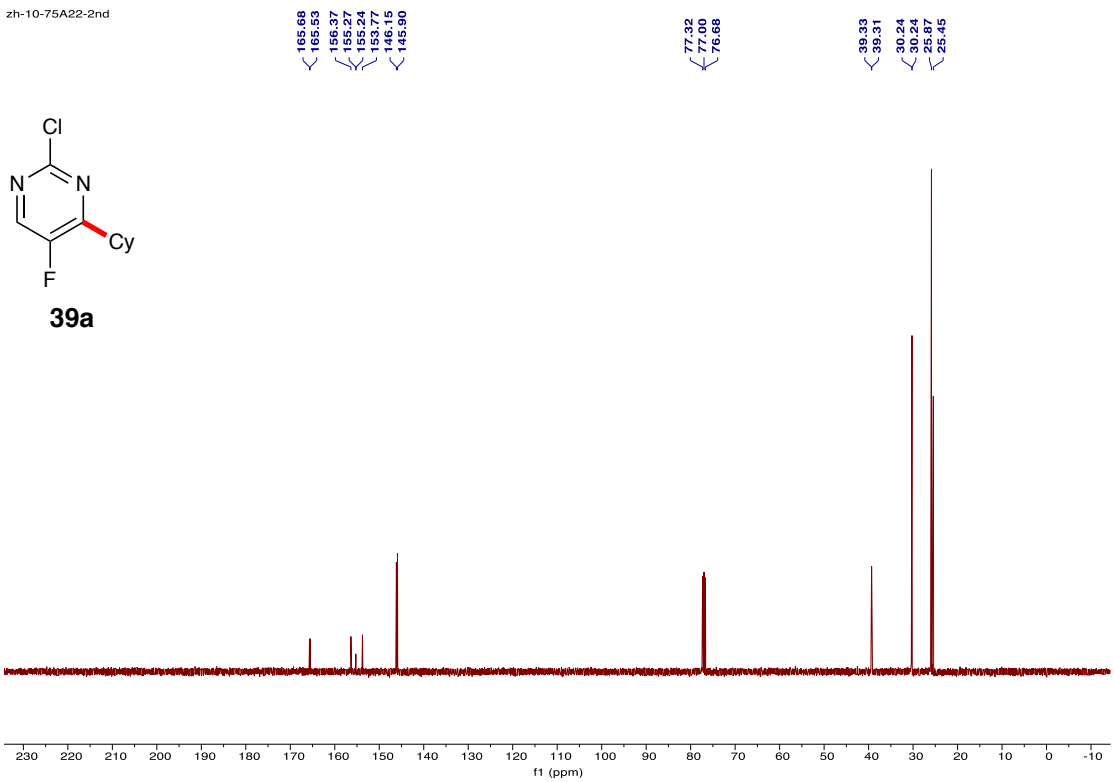



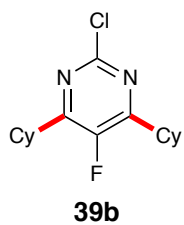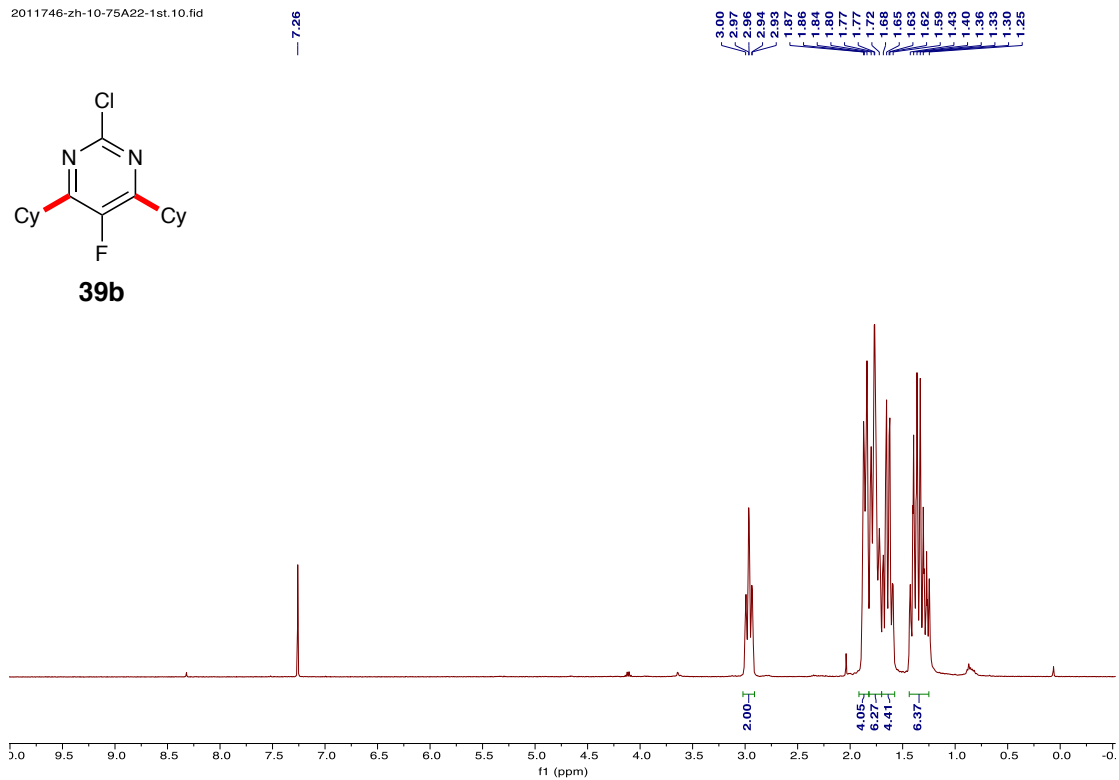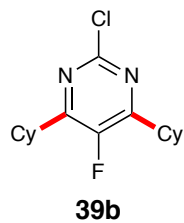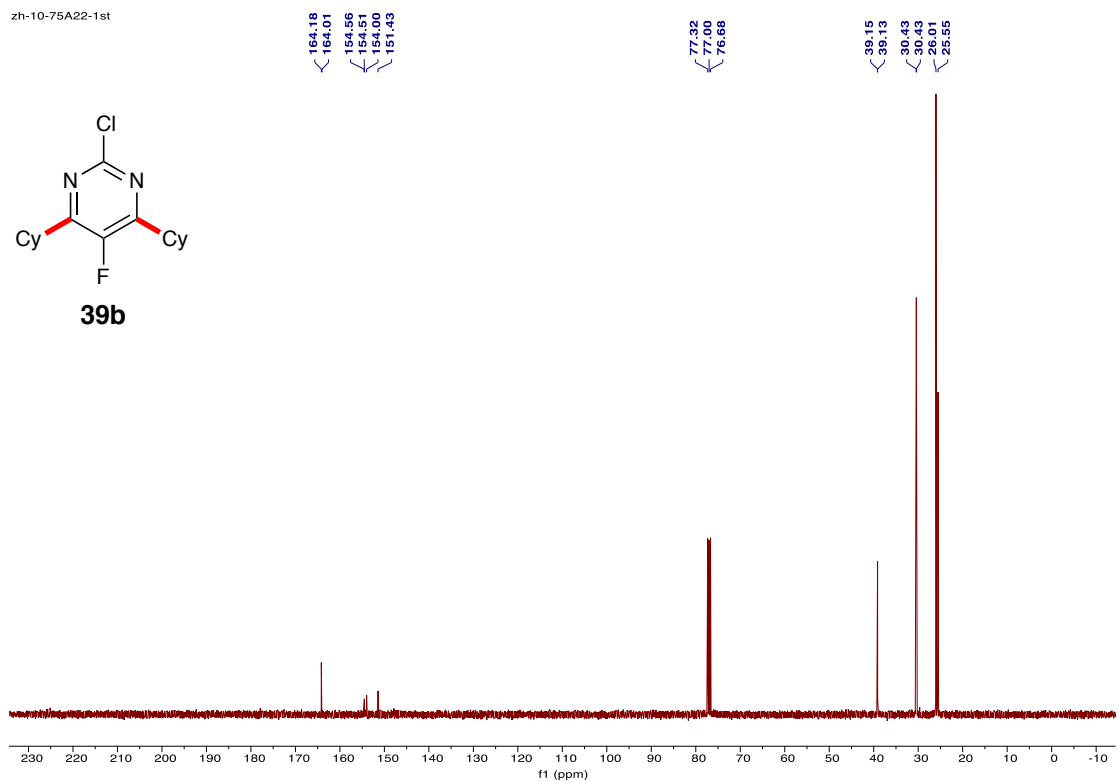

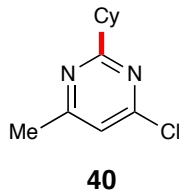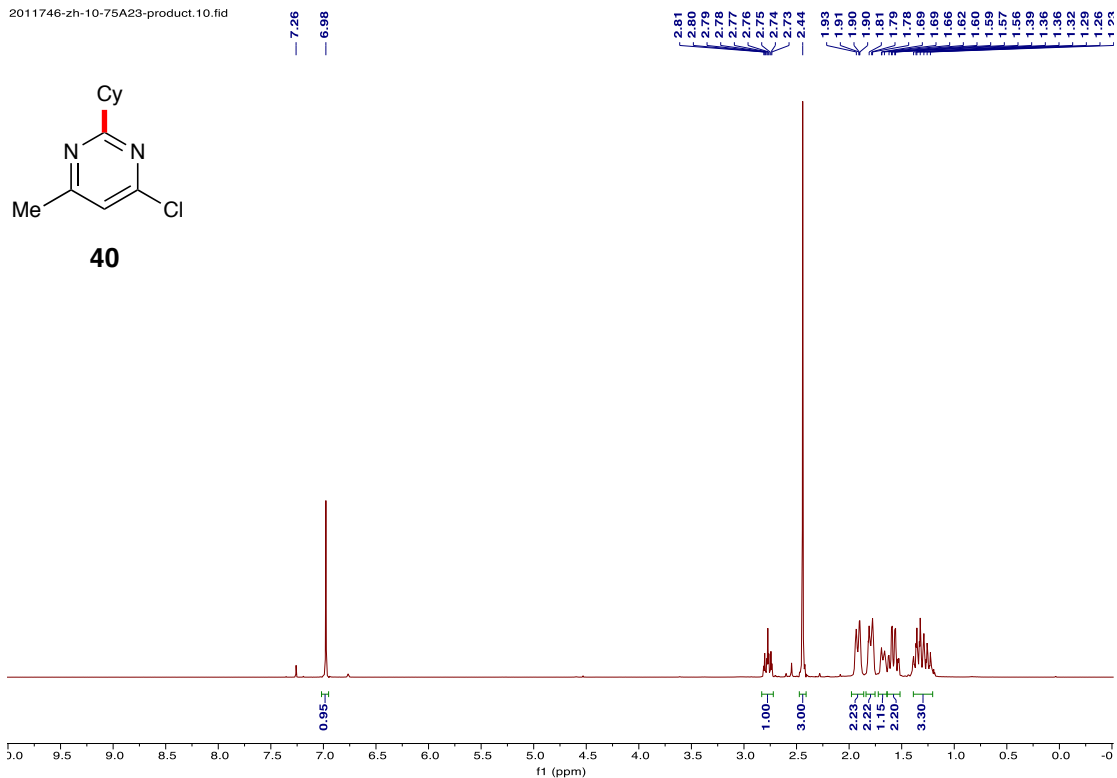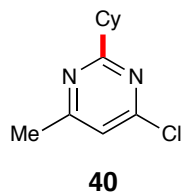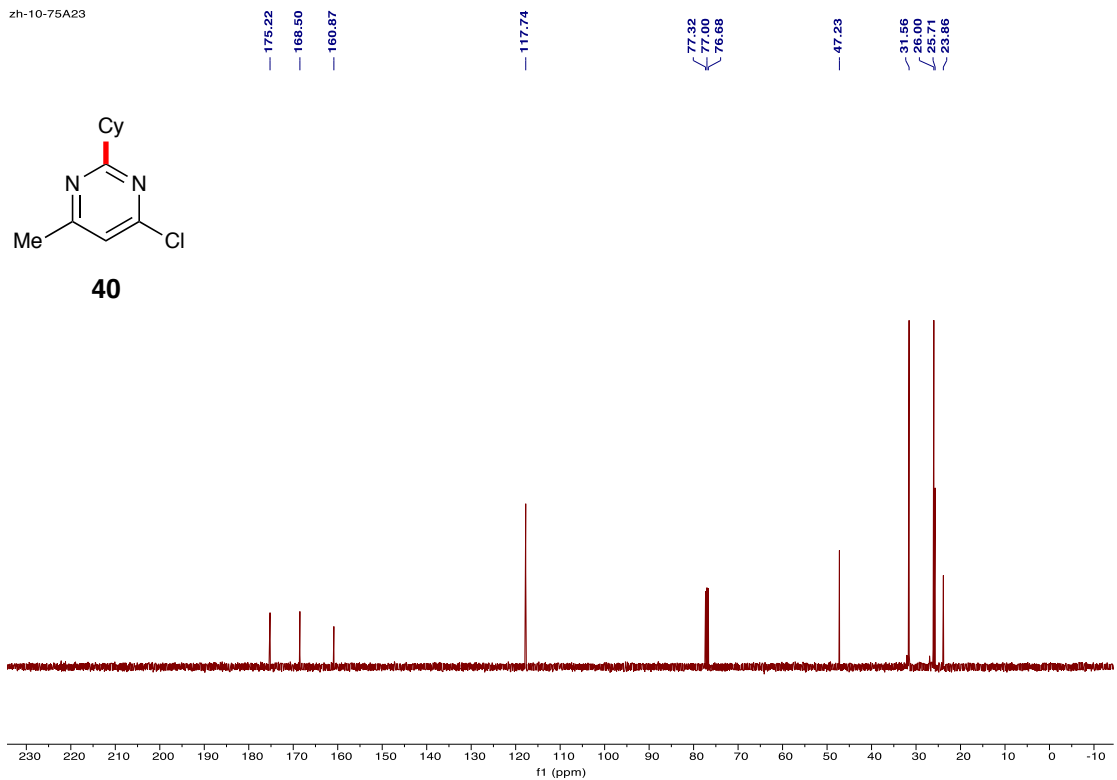

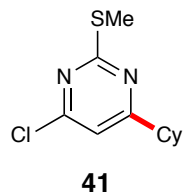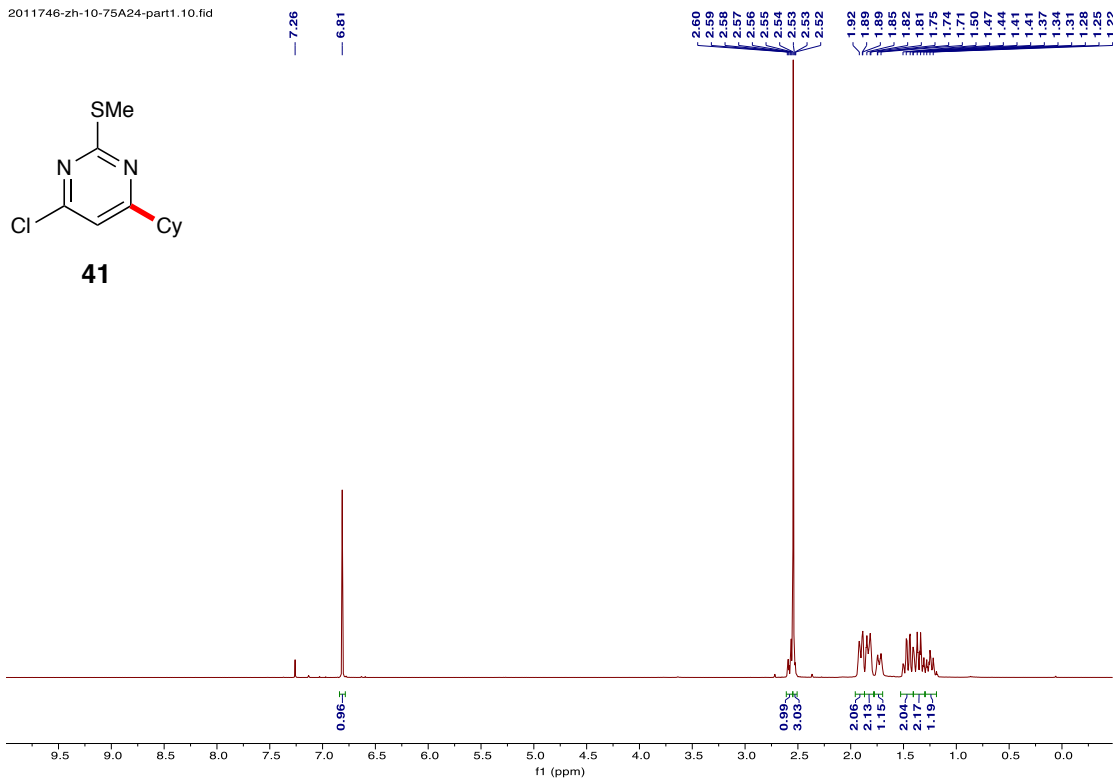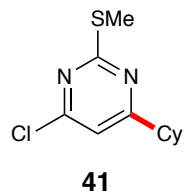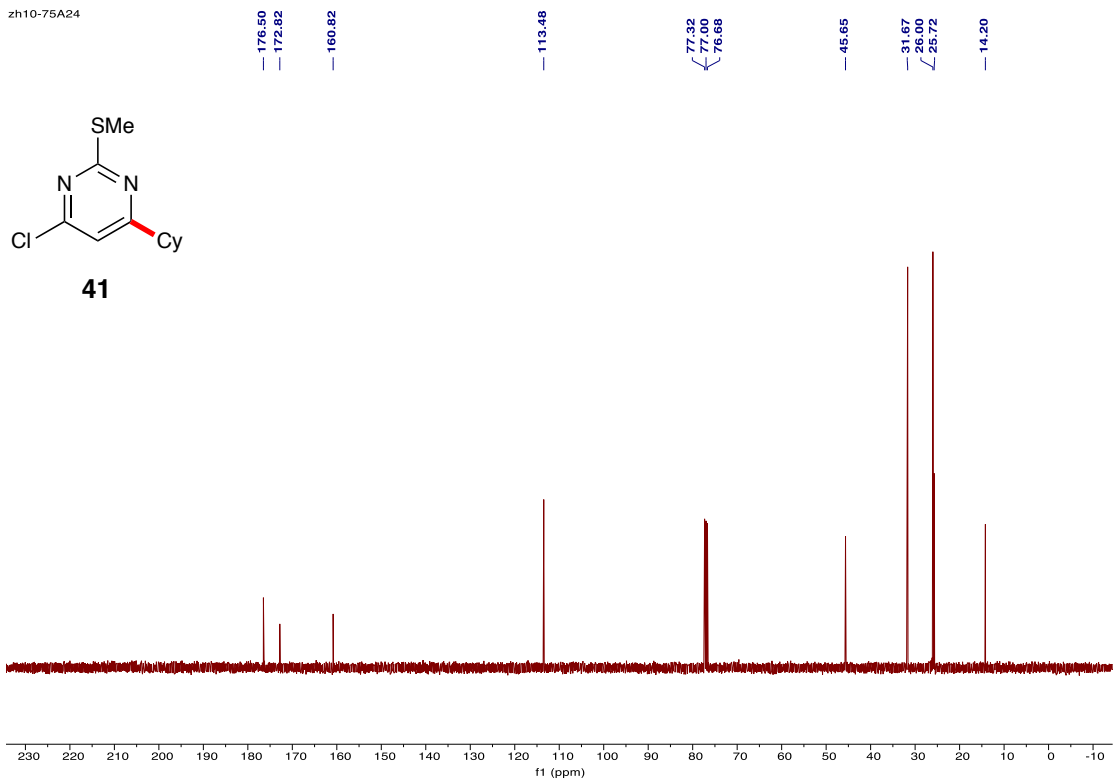

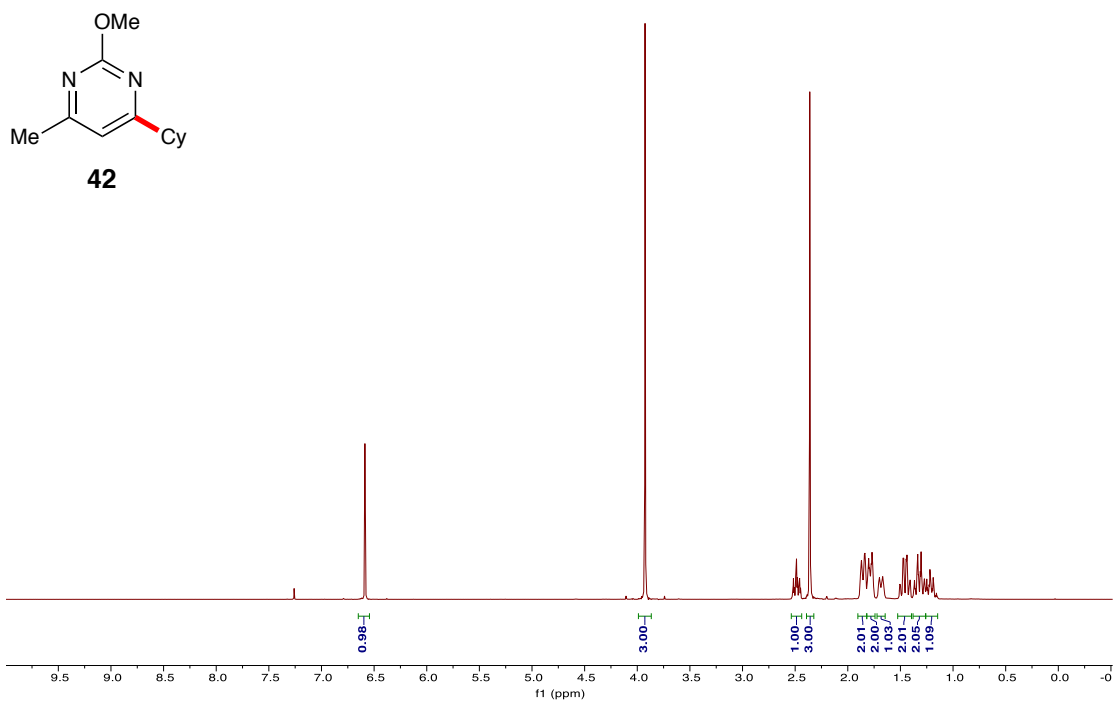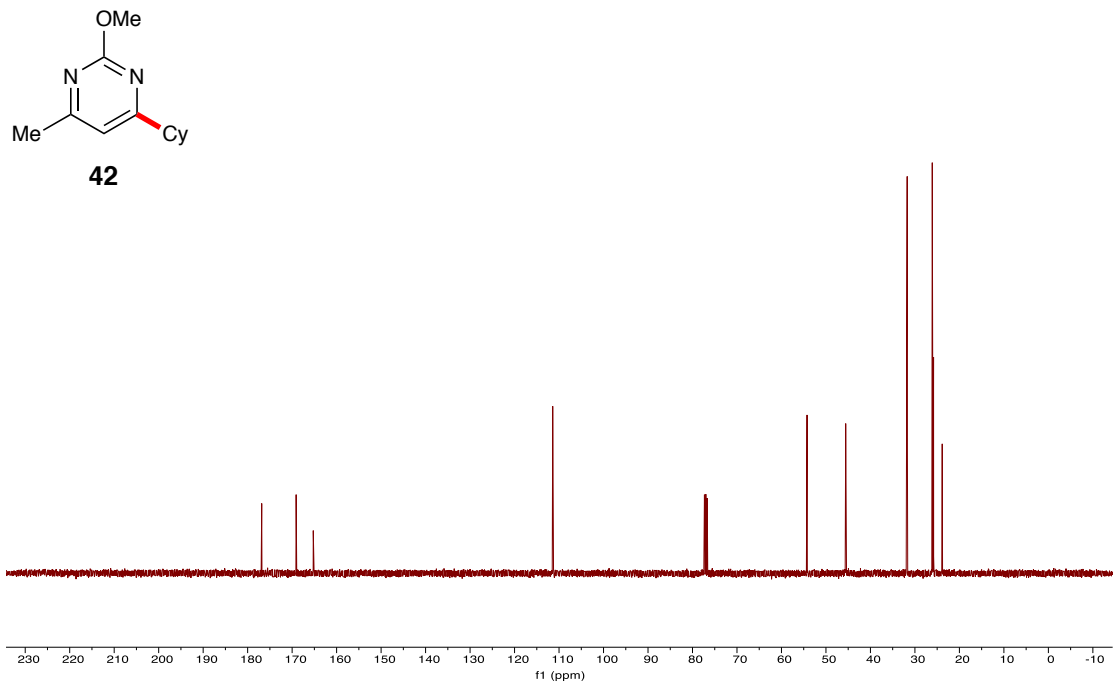

20111746-zh-10-75A9-2nd-3.10.fid

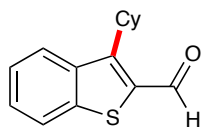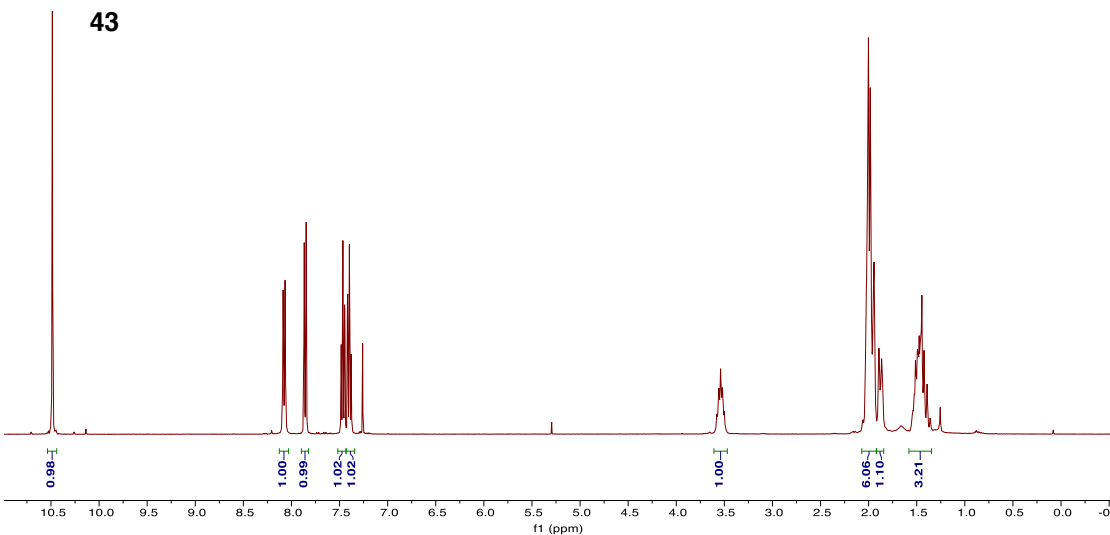

zh-10-75A9-2nd

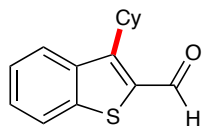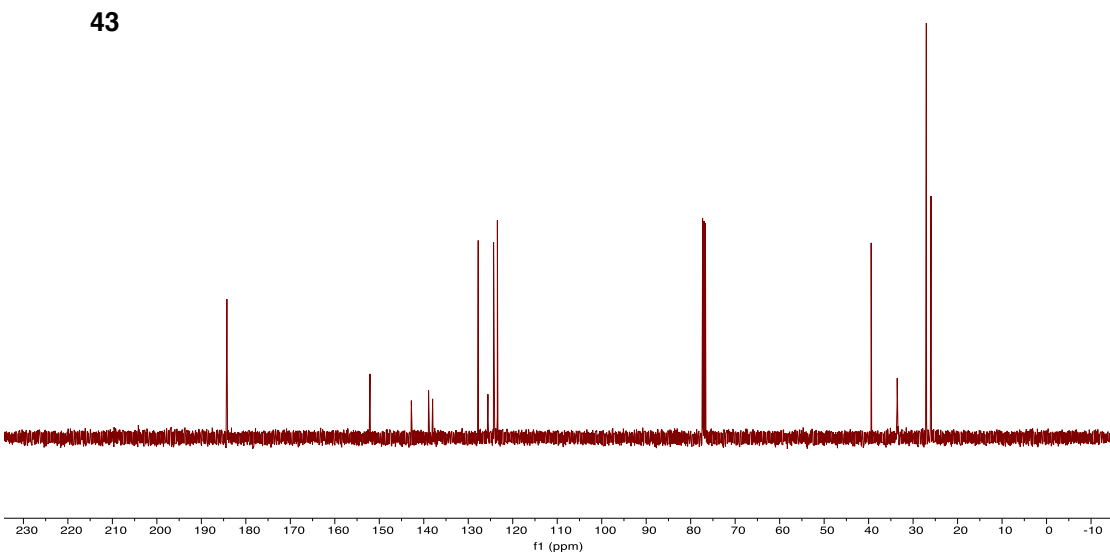

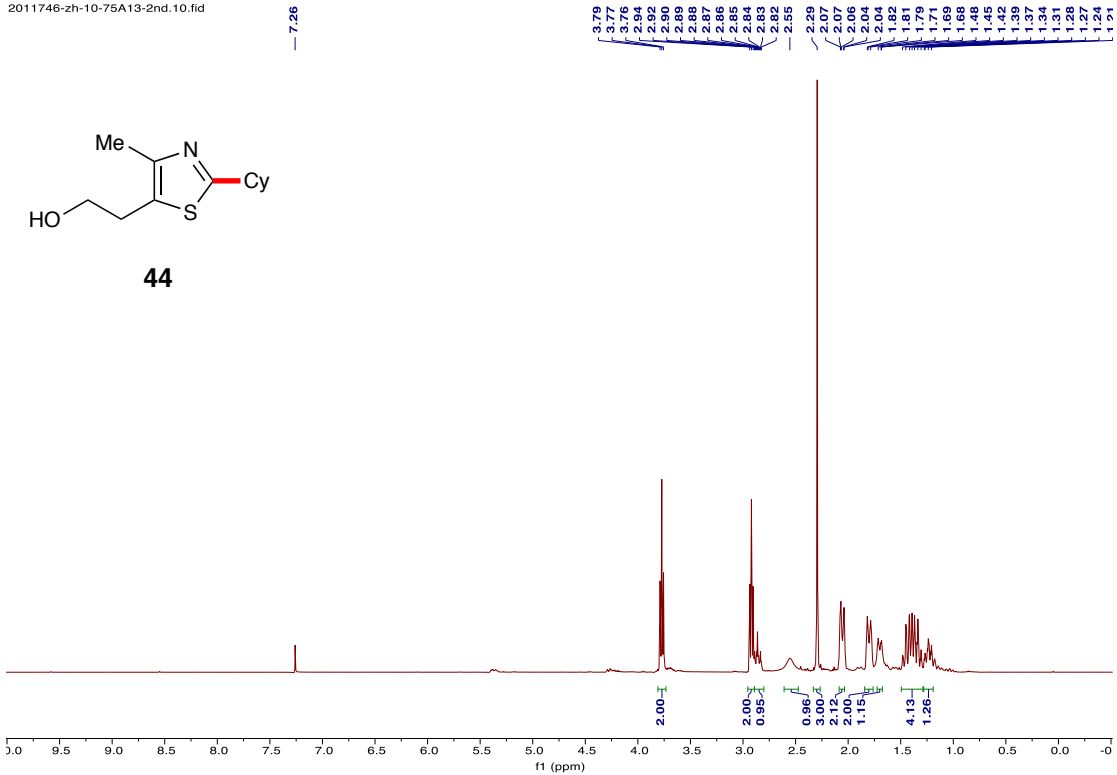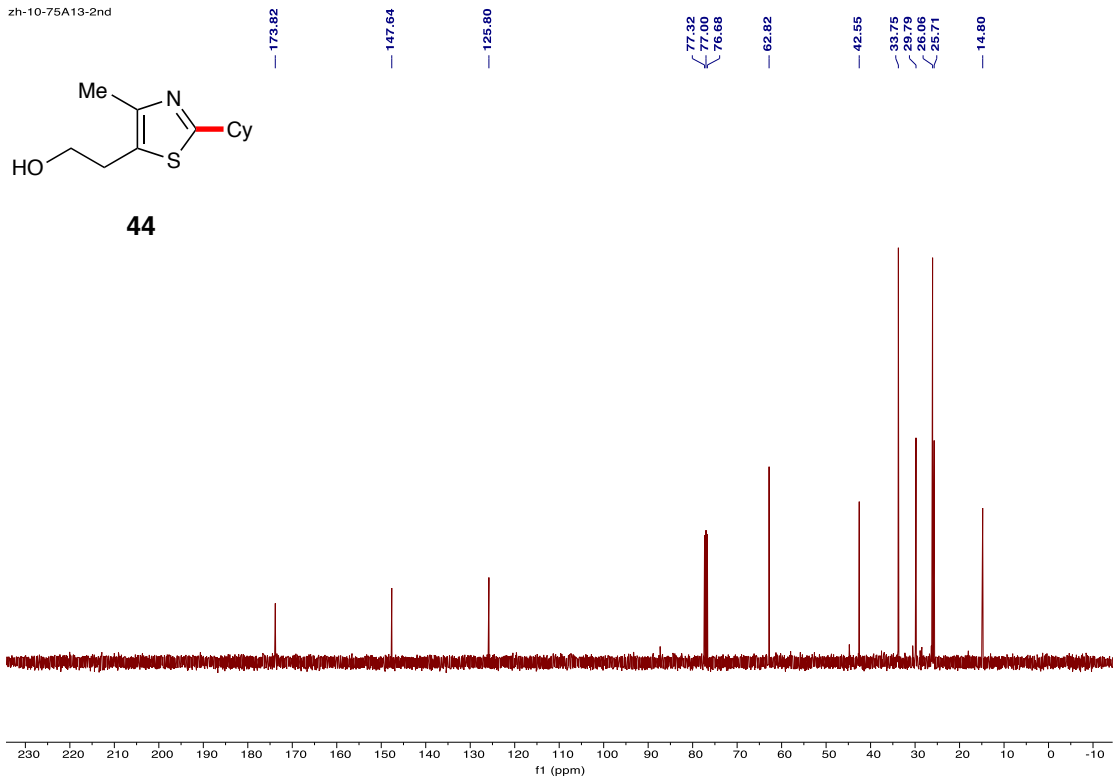

2011746-zh-10-75A7-1st-product

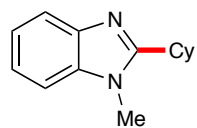

45

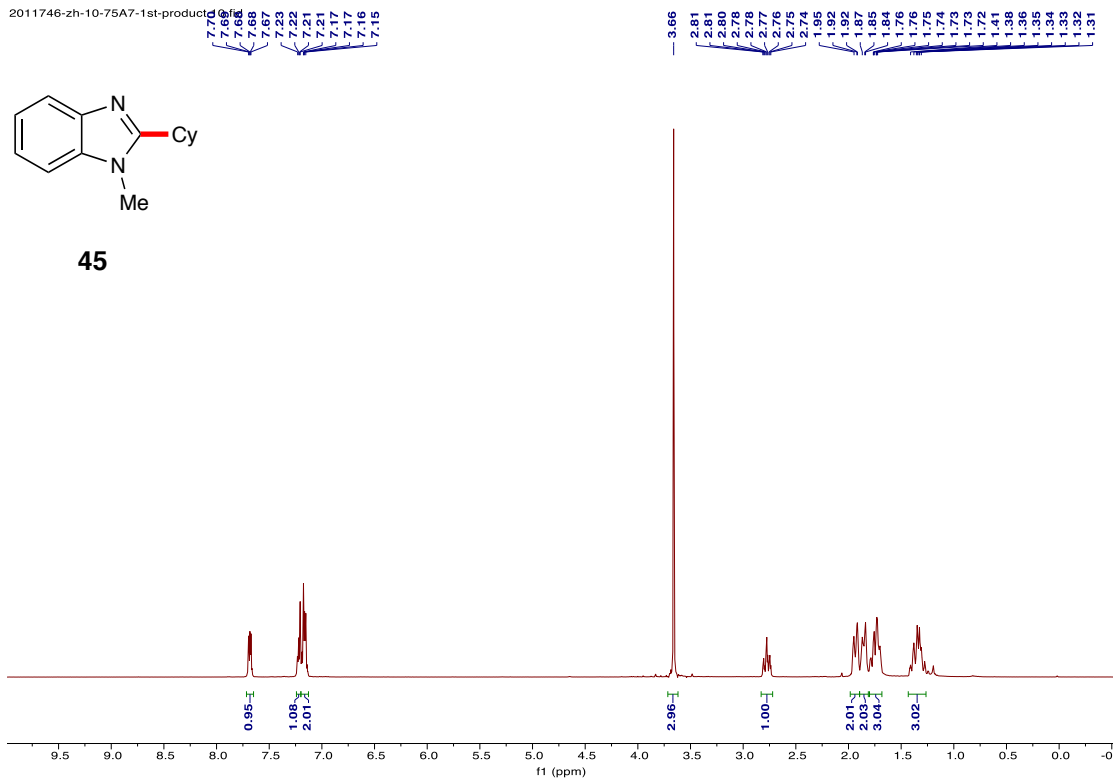

-zh-8-87A1

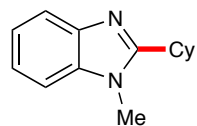

45

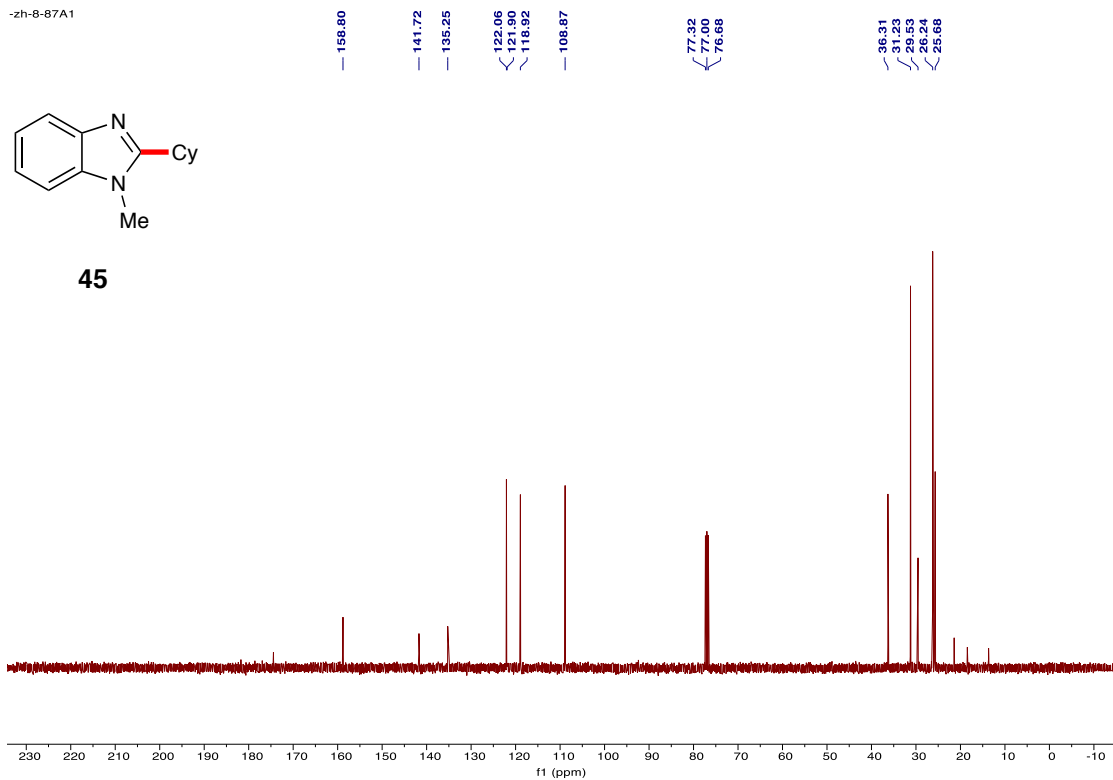

2011746-zh-10-79A5-2nd-1.10.fid

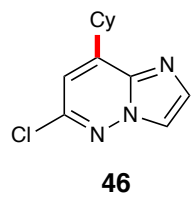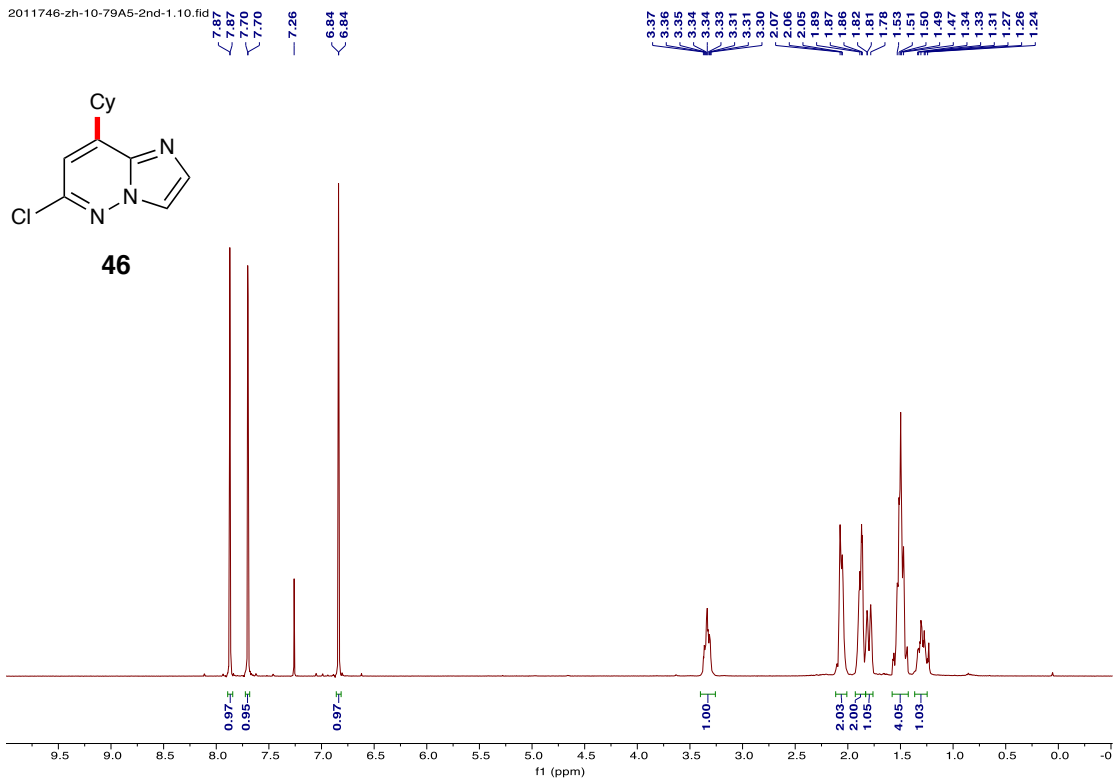

zh-10-79A5-2nd

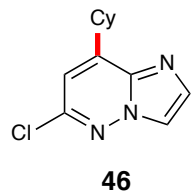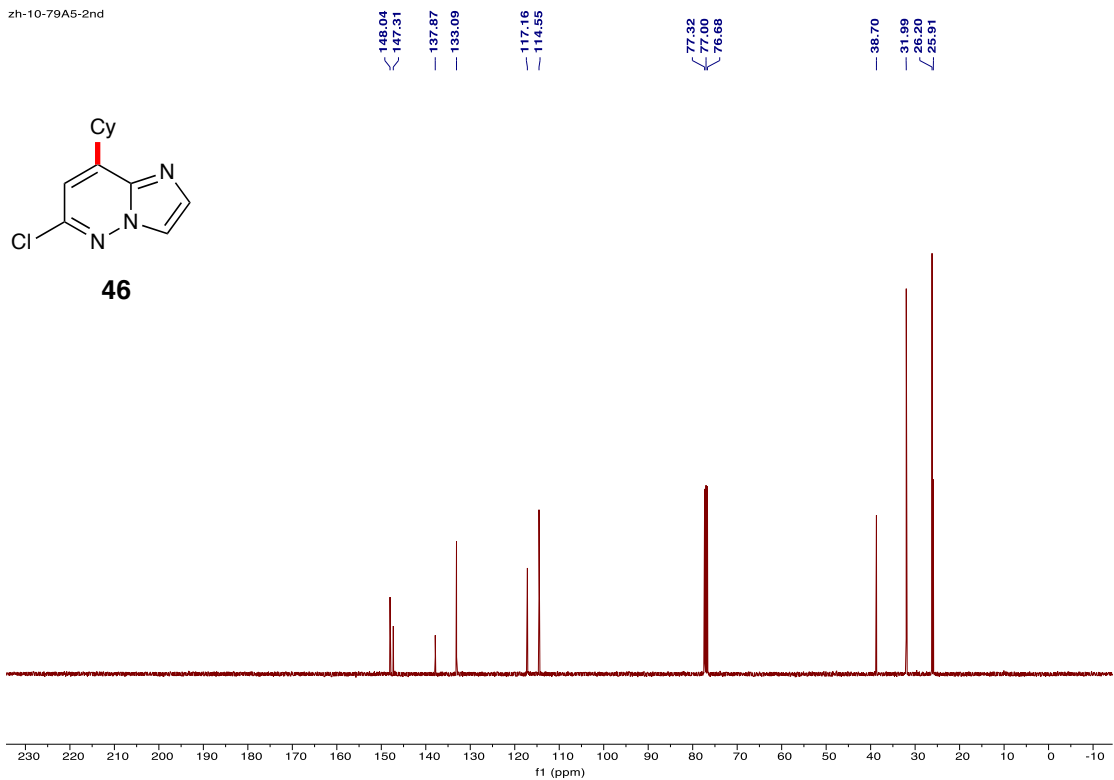



2011746-zh-10-75A10-2nd-3.10.fid

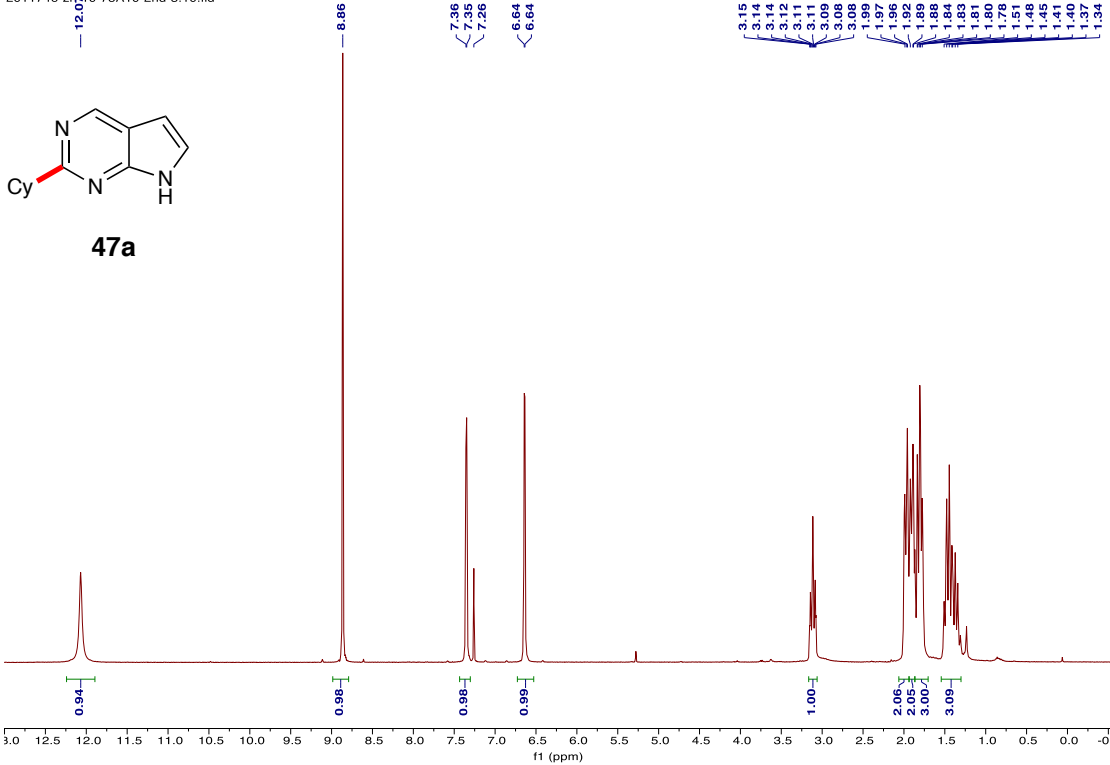

zh-10-75A10-2nd

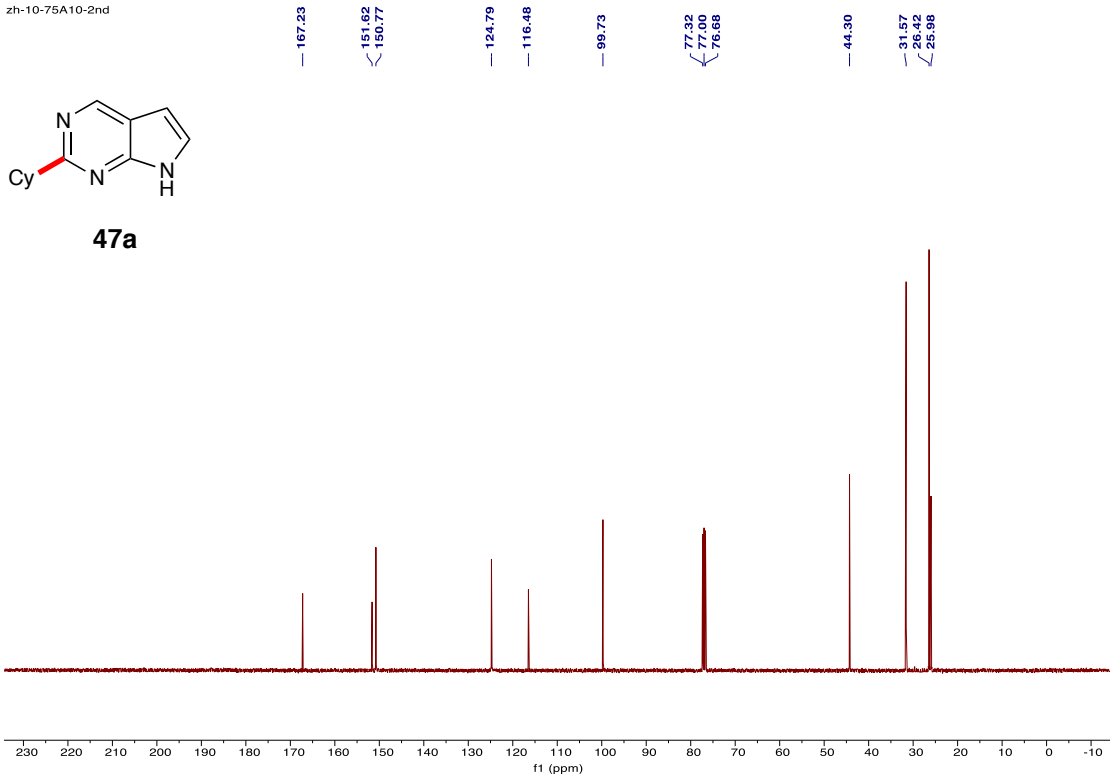

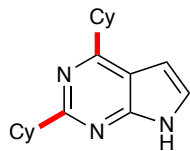

**47b**

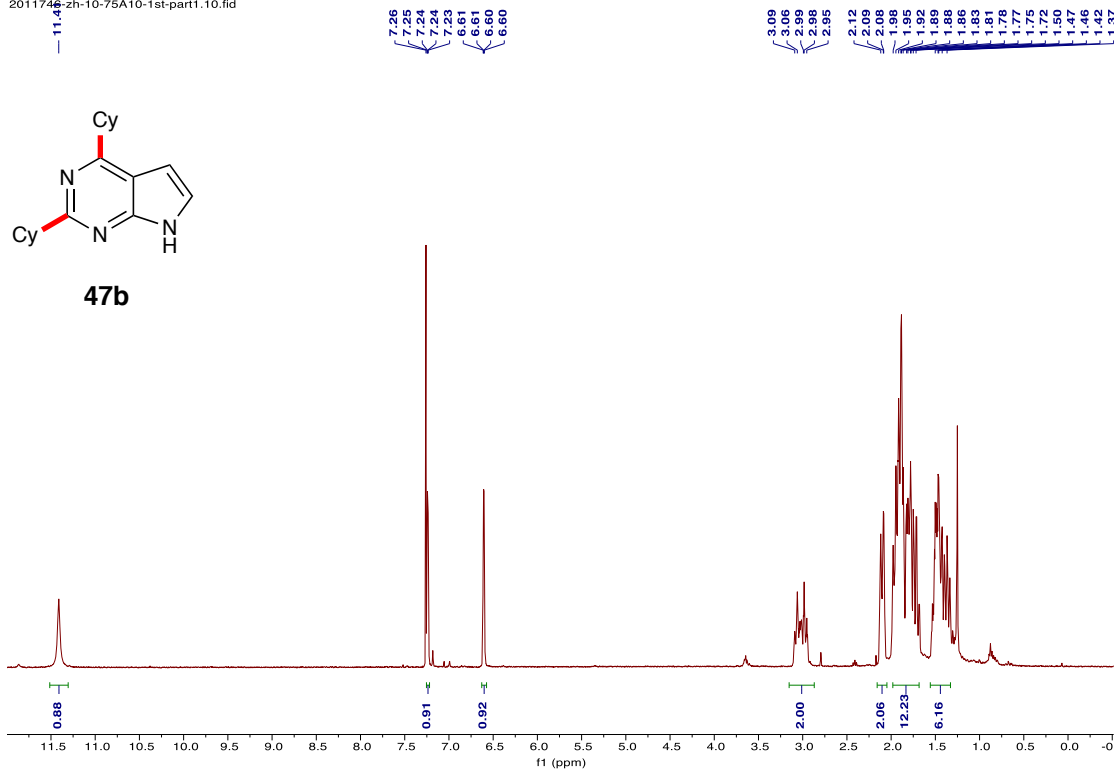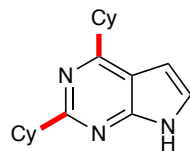

**47b**

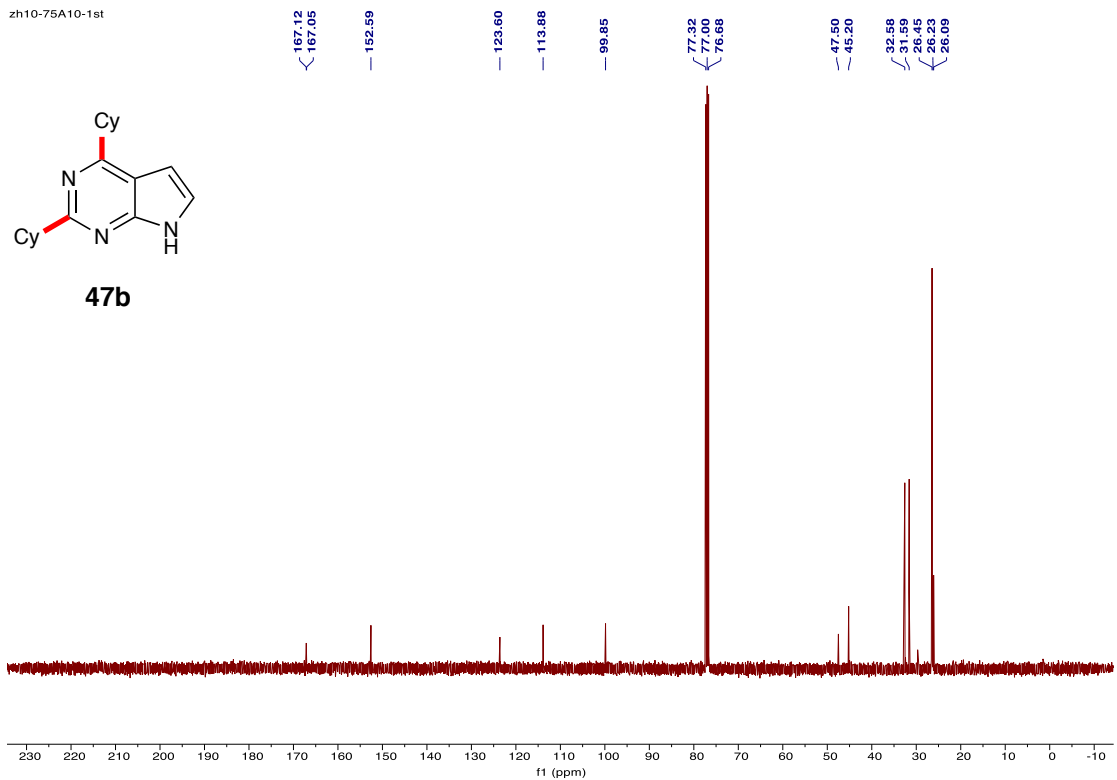

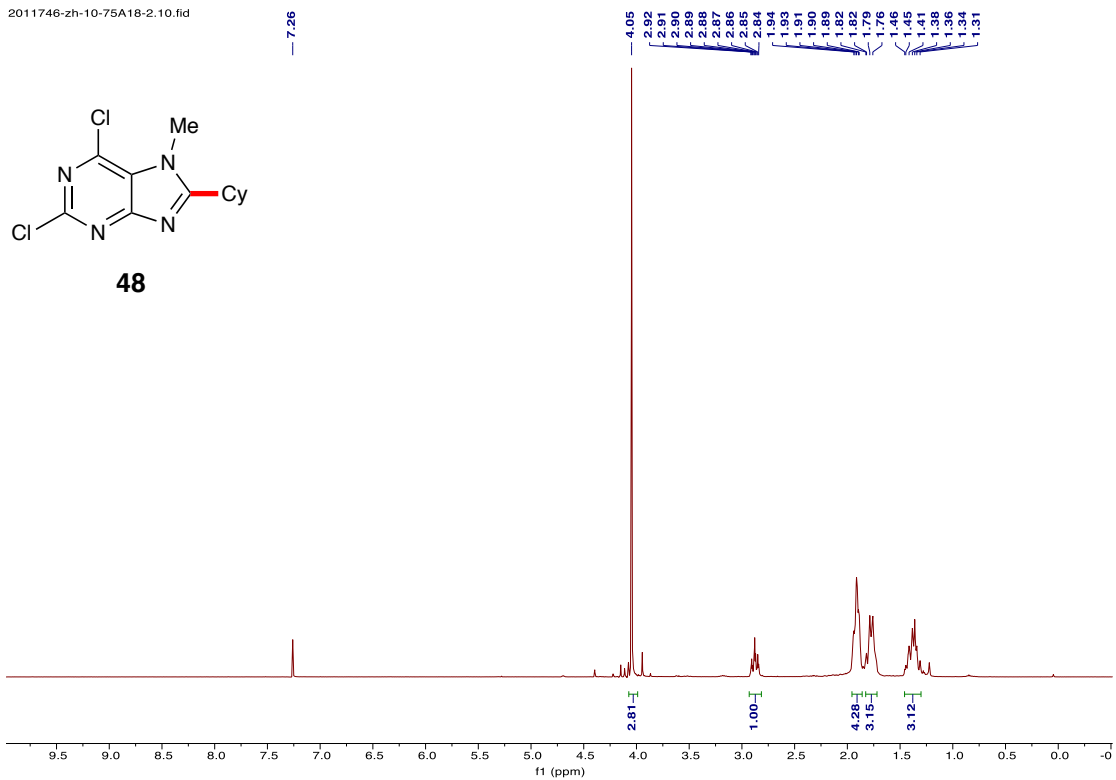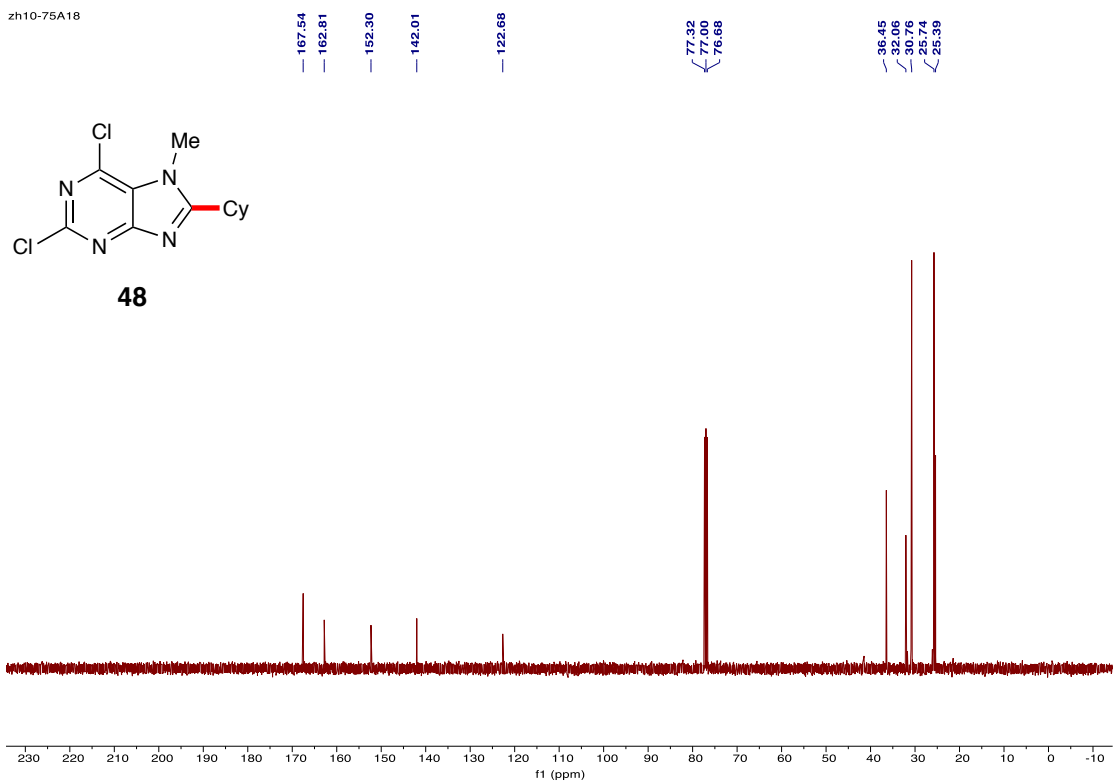

2011746-zh-10-76A22.10.fid

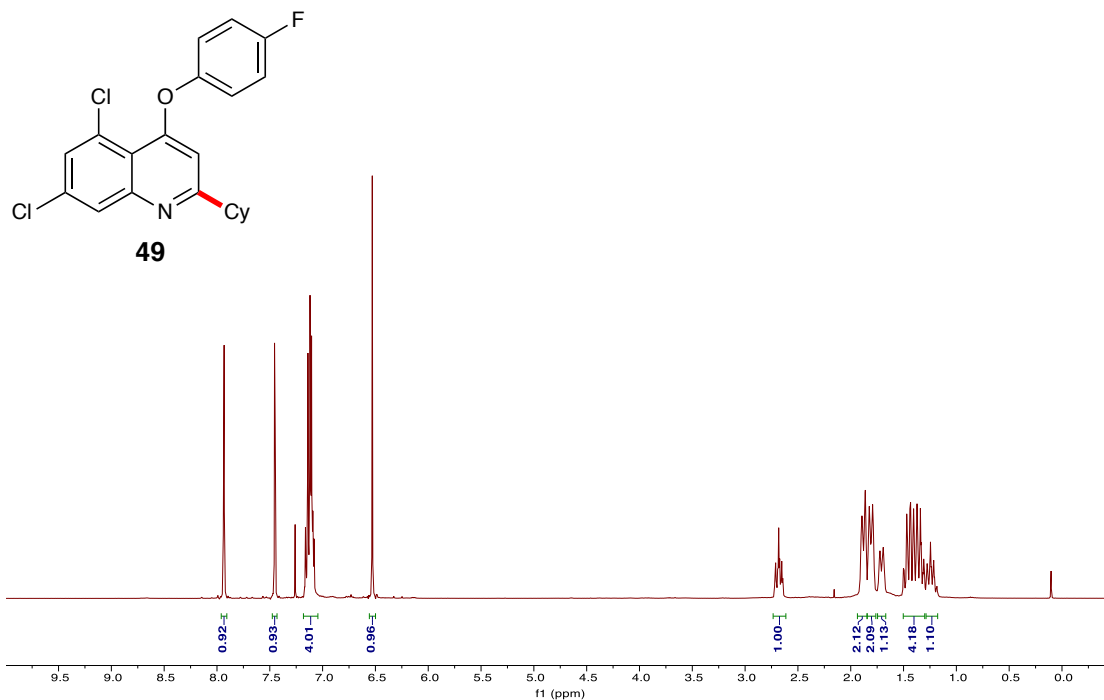

zh-10-76A22

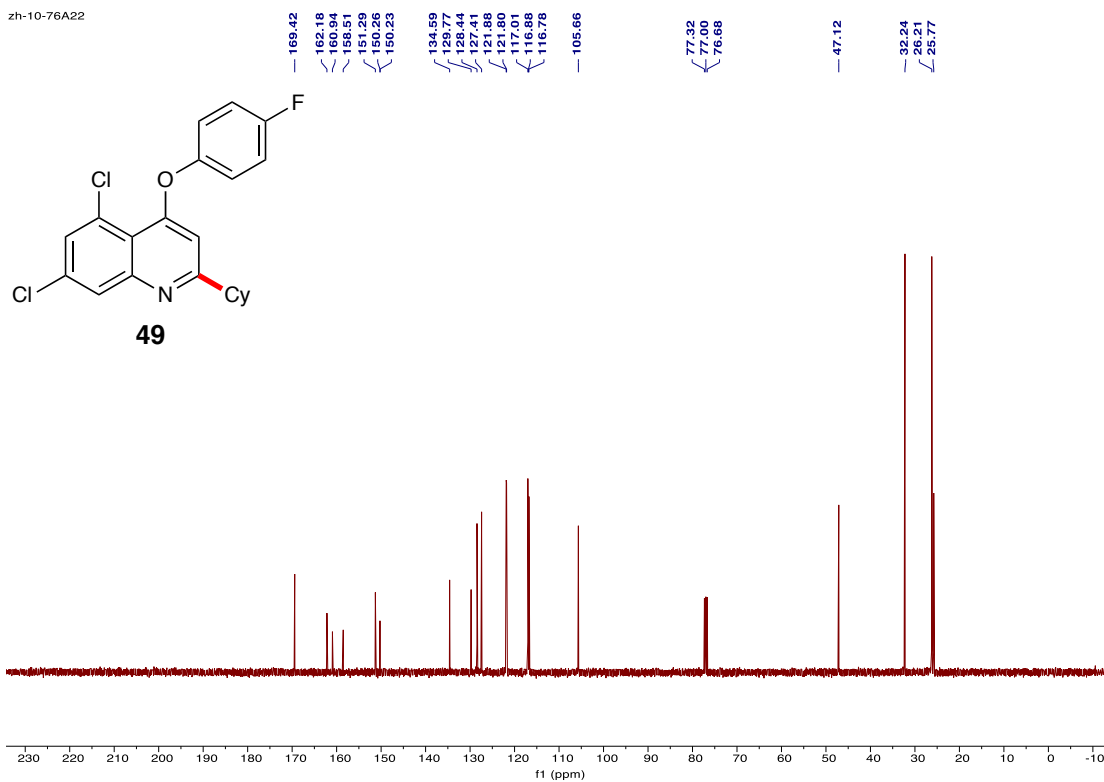

2011746-zh-10-79A3-2nd.10.tif

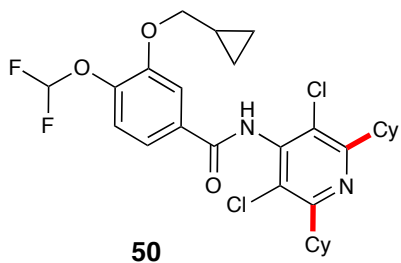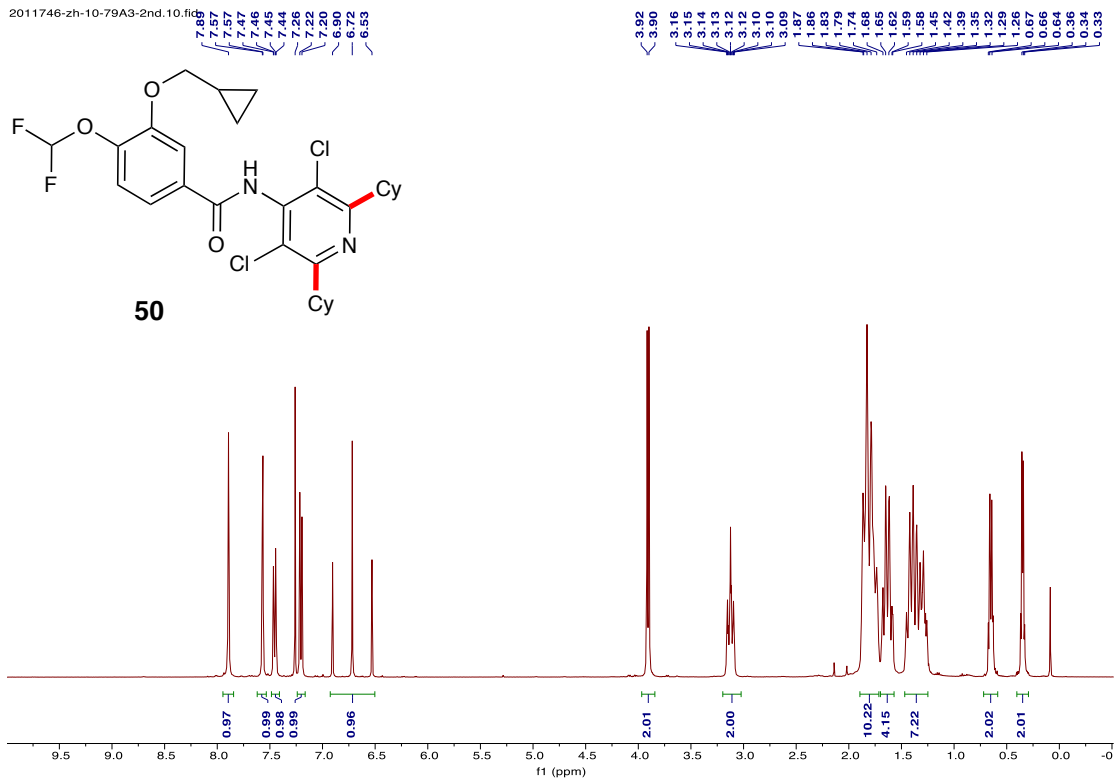

zh10-79A3

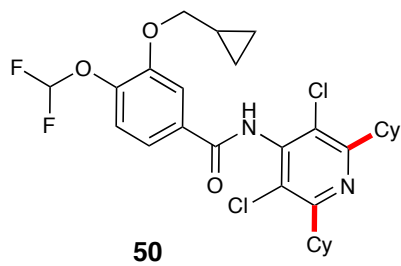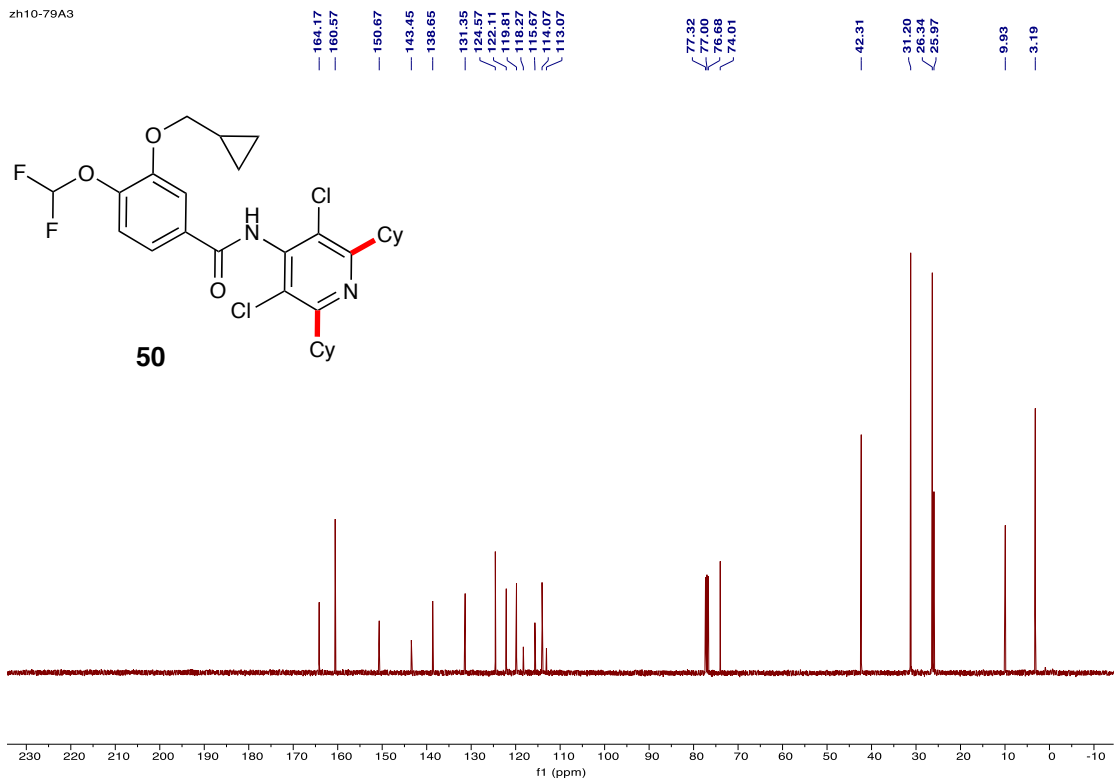

2011746-zh-10-7960 at-2.10.tif

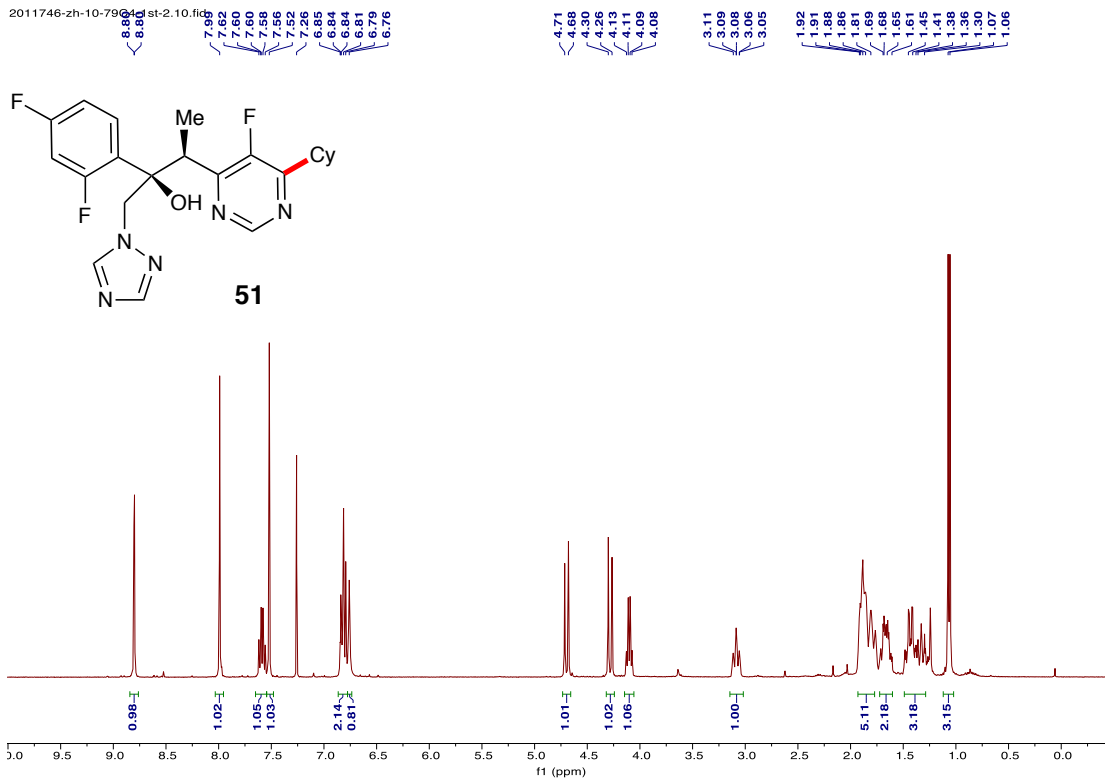

zh10-80b4

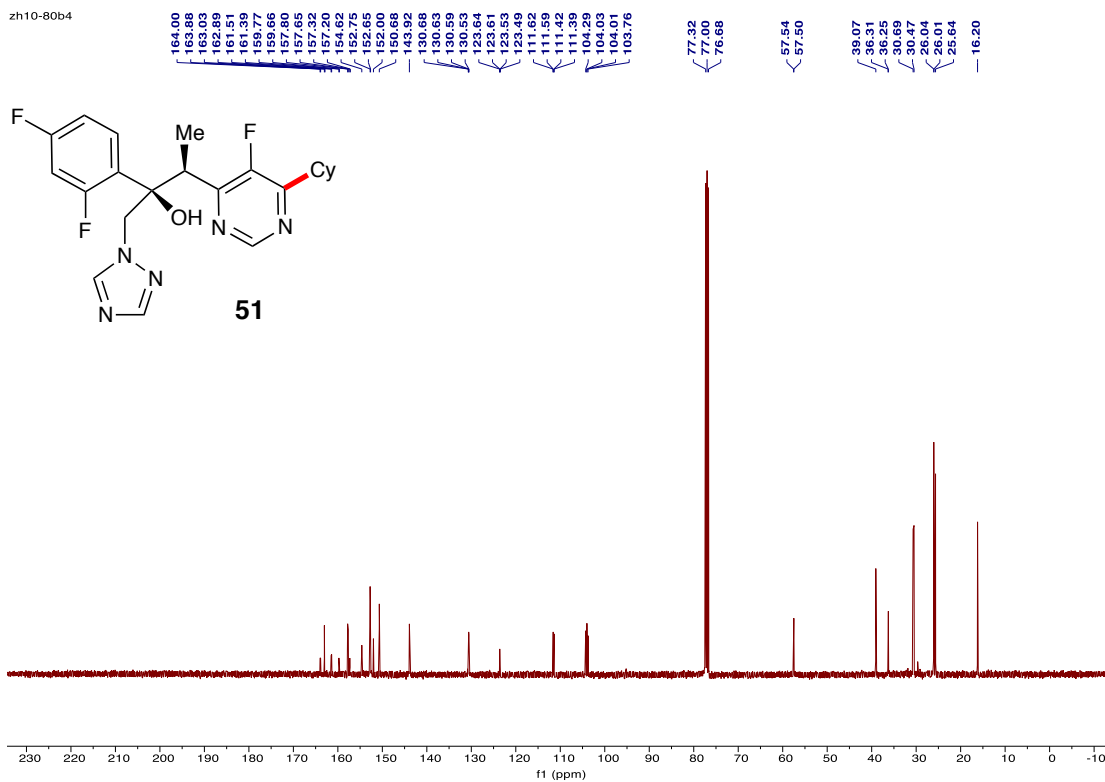

Supplement: c9nj03106e1.pdf [file c9nj03106e1.pdf]
